# Supplementary material for: The Epc-N domain: a predicted protein-protein interaction domain found in select chromatin associated proteins
Source: PubMed Central journal article supplement (PMC1388200; doi:10.1186/1471-2164-7-6), 2006-01-16
Supplement: 1471-2164-7-6-S1.pdf [file 1471-2164-7-6-S1.pdf]

## Epc-N SUBFAMILY I

>OsativaNP\_914427

MRSPCFLNHGGSRDTGTEVCFVLLRFLFHCAPFALRIVEIPSLGYGLSPLRLYGVFSTDLHTSRSTDRPW  
EGAFDADRFYPRRRIDSAAQFGADPRVGRIIRRTIQSSCVFSCEICGVVRDWRSEVVCVIRIFSAAGGGSG  
LDSVVGSTLLLSGSDRPSATDATESVQGLDGEETLSERASVAGQGPSSQNGGGKEEPSSSSSAGSKRKR  
TSLSSDRVELNGLDAAGTSSGDSTWSEDSFNHRHGRSLPRNKDGHLEHSVNSGEVAVIROPRGVLRLRKL  
AQNVSIKSGTGGRKVLRSNGITKATQVQRKRKRKSOQLKENRVGSNDPINCCLKVENGTCDQDNSTNFCSE  
NDVSVEKQPNLSGEPKSHVHPTKESSVHVQEEEDNVNLEENAARMLCSLSDNMCASSLRKSAKSLNRSSKA  
YFVQHSEHFKDCSNCKDKGMAGPARLLRNRDGGKASSKRRRPRRHFEVSPHDVDPFCIVKERIRVFWPLDE  
IWYFGLVKEYDPMTRLHHVRYDDKDEEWINLQNERIKLLLLPSEARHKSNNRRNPRSIFKPKYEVDREDI  
DRNSTGSSSESGPIISLLSRSNHARSATSSNTNKQNHTHSDISPVMFDQKQSMLCSDDRPGGSPANAGEEI  
PEDRTTLKDSRFRFVYSRKRRCRRKNGFLNTSEQSDSLKYRKVTGALFASVAGWGSVTENVTSRRHGILV  
LSQPLKSIYKIMSEACHVWLLNALVLLHRGAMVSLWPAVHLEILLVDDTLGLKHLLETSLSRAVSLFCL  
LVGCFNSYSKASTRNEKMLCTSVRVRISGLHGRSQVFLMFSFVGVKYPKWKHLQGLQHHHIKRGLSK  
VNCACADIKQLTNGTDQRVCTSTEHFSGKLSLDAQDSLFFTESKYSNVDPIIFCLDERSKSVQNHLDVAA  
APSLFFHHLKLRSESNLTSKSLPEFMPITILEEDQQSLPQHTSDLVHLAASASEVCSVYVSPSNTGSLDM  
GTAGCINHSGSASSKLNATKRTVSLDCNSRGIGGANITSRSPDQIMDGSLSAVCPPQYQKRCSSISIP  
GDNISDPPDDKLLNKEEKAMQPTSDLVQELNEYPIGRVTPPTAPRTPYHRNRFTLSRSTFGDGSKLWQEDI  
MVTGFAGGSKKPRTOVLVSVSPRSDEPGSKKHGHRFKIQSHSSAKRLPDNSRSEQSSPELACVANVLVT  
VGDRGWREYDQITIDSDGQSERICVLAEGTKYAHKVLQVLOPGATNRYTHAMIWKGGEWACLEFPDR  
SOWLIFKQMHDECYSHNIRAASVKNIPIGVCFAEAHDDHDAVSVFVRSQDYIGHIGTSDVEMALDESRIY  
DMDSDDVEVSRWRKLGKDSVTDLDFERIMDKFEKLDLAYSHNCNELTIDQMKELSDNINPLDTIKVIHD  
YWQDKRKKKGMPLIRHFQSAMWKIHEQQLQEWESTALRIQSSNGYQVKLPPKALFAFCLRPRGLQPQI  
PYKGPQRSHKMLSSGFSFSREQDGFYRPGYSPRFSVKTESPRAFGLERCSTPRFLRTNSVKRTASFAF  
SEDHQPSPSFRHQRVKRGAPDHWNAVIHEWQSSKHLPLGASQSPRVDIEELKQORDASSAAQHAVAMAKLK  
REKAHLLMHKADLALHKATVALMMADAIKASSRDSRDGRRDRDD

Agenet variant  
Epc-N  
Coiled coil

>AthalianaCAB79979

MQVAFMENRLGNSNGVGISSKRSRLDLKTLTKYKSSISKDSVNKSFKRKHRSIDGDQLKQDKKSRKVVSL  
SFKKVGSQNESILDKACNGTTILHNLEDSKEVGLDEKLCDSNGLQVISVGLASSTIYVPRRRRDFVGRSR  
FENGLAQKSAGESDSQEELVNIIPKVTAEESSVQDQPSKVEEKDSKDIDKESNSAAPLQLENGHSNQSPV  
KDDQLVVVKQRNSNSRKRKSSASNRRVGKEAKSSGDASGRISKVSREDDEENLEANAAIMLSSRFDPNCT  
QFSPNSVTPGSPASRLHPLPSGKNSVDPRSELLSSKCVSDDTDDRMLRPRRHNDGKGVKRRRHFYEI  
LFSDDVSHWLLNKKIKVFWPLDERWYHGFVDGFDGDKNLHHVKYDDRDEEWINLQGERFKILLFPSEVPG  
KNQRKRRCSESKSTQKVKGNDTSSKDEEKQKEKLEDDSCMESEPIITWLARSRHRDKSSTLKAVQKRKKT  
DVMTSNESVKMNGDVTDRSASSLASCGLPGPSKNELESSGFRNGSIFPIVYCRRLHTAKKDIYKESGYN  
SVEFLKQFLVSKSPDPGVEFLPIEDSGDLELCCPWNESEQFELSLSLQGVSLMSYFLMADVDWLSRAALL  
LRHGTLVTLWPRVLEMIIFLNNQDGLRYLIFEGCLMEVVQLIFRILMVVDHSNKQGAQGADADLQLPVFS  
IGLQVSCIPGFQRQLGFQIYSFHEVKHKSWSYLEQNVRRHSLLVKQVSI AECTHNNMKVLQKVMQKRSRH  
GISSGLVSRGSSSAEAWPTSVCYKKQNTSPFALLFTARPPTLLLSLHLNMIRELGHDSADFLGIERDLVT  
HRGCDMAFTNEHSELKSKSQTDEPIITSSRAQESKDLHTPSQSQQLGSDSENWMSYSSSVVRHKHET  
RSNVSVNGISIQVPI SDDCEDGTPOSSNLALNIQSSNSSPKATAPRSMWNRKSSSLNGLSHGWSDSKG  
DFLNTNLANGPKRRRTQVSYSLPSGGSDSRNKGSLKGMPPNKRI RRSTADVTKGIQKDLESSLCDANVLV  
TLGDRGWREYGAQIFLEPFNDNEWRLAVKISGTTKYSHRAHQFLQPGSVNRFTHAMMWWGGKDWTLFEPD  
RGQWFLFKEMHEECYNRNTAALVRNIPIPGIRMIERDNFDGTETEFIRSSSKYFRQTTEDVEMALDPSR  
VYMDMSDDEQCLLRIREC SSAENSGSCEITEDMFEKAMDMFEKASFVKQRDNFTLIEIQELTAGVGSLE  
AMETIYELWRTKRQRKGMPLIRHLQPLWEKYQRELKDWELVMSKANTPNSCGSQKKQSPTEKPFAMFAFC  
FKPRGLEVKHRGTHRSQKLSVYAQHSSALGDYDGCNSSGRRPVGFVSGDERFLYSNQSYEHSNEFSVH  
PGTYSRDLGMGYFSSGGNGYHRNHQNKSQRINGKRNTSERWDAGYSECPSSNLVCYSNGSQRPDVEGIR  
NSTDIDEYKLRDAAGAARRACALAKLRERAESLRYKADLAIQKAAAALMCAEAVKASSEDLGNNNGVES  
SSEG

Agenet variant  
Epc-N  
Coiled coil

>AthalianaCAB86009

MPSVGMRRRTTRVFGVVKAAADGARVLRSGRRIWPNVGEPEKVRRAHDVVDRDCDSVLKNQNKSKGNKVSSGK  
SNSQPCSPKQVSSEKEDKVDDFPVTKRRKVRNEGVEGDEKTVDKMFGIVYSRKRKRLCEPSSSDRSEEPLR  
SLKFYRRRRKLSQRVSSVLTTLTVDWSCEDCWFLTVFGLAMRYIRREELRLSSLASFFLSQPINQVFADHG  
VRFLVRSPLSSRGVCKFFGAMSCLPLFSADFAVIPRWFMDFHFTLVFVRVLP RSFFFVEKSLYLLNNPIEE  
SDSESELALPEPCTPRNGVVVGLHPSVRASKLTGGNAQYRGNLGSFSFQKRSSLRRRRRARNLSHNAHKL  
NNGTPVFDISGRKNRTAAVSSKKLRSSVLSNSSPVSNGISIIPMTKTKEELDSICCSANILMIHSDRCT  
REEGFSVMLEASSKEWFLVIKKGAI RYSHMAQRTMRPFSSNRITHTATVWMGGDNWKLEFCDRQDWLGF  
KDIYKECYERNLLEQSVKVIPIPGVREVCGYAEYIDNFPSFSRPPVSYISVNEDEVSRAMARSIALYDMD  
SEDEEWLERQNKMLNEEDDQYLQLOREAFELMIDGFKEYHFHSPADLLDEKAATIGSISYLGRQEVVE  
AVHDYWLKKRKRQKAPLLRIFQGHQVKKTQLLSKPVFRKRSFKRQGSOLHGKAKQTSPPMVAVKAAEPE  
EEDDILRMEEAKVLADKTMETAIAKRRRAQILAENADLAVYKAMRALRIAEAIAKEAESREVDTTVV

Epc-N  
Coiled coil

>OsativaXP\_463767

MRKRTASDRIRVPSSNPAPSPSPPPPPPPPEEPAVPMPHVGARRSTRVFPKTPRPPQPSDPAVLRSGK  
RLAFSESPADAHWFQCKPNNCFHVHDHQQLHDDPKPPPPPLPRTRSFQIVYSRKRRRRLPEPKEDTRFA  
IVFTRKRPKVAPFQHAPNDLATIPCSSSREFASRTGFFDSHFLTLVDCIPTNKADAAMLIVLDSSCSG  
SSQHFLRLLLSVLRWMRSCRRGKVRNLASFLSSDAVATALALRGLHFVQLQCRDCALSQRALVQCGWCE  
LRGAKDSEPLLSVNFLAVPSYFQILHLLIALESMYLPAVIRTRMHLVGGAEIYPRTLLEEDSESLSTGD  
TDPAVDLCSNKLC SVAQDYVPLEE IAGVVVHGLRLKKHQRKRSSMRHPLSRQRLAARFPDKVVATNQT DV  
ARQTEADAPPSVSPLEPLEPVKPKAALEISLDLLENMDDSDVSTPIGSNGKQKRSSLKSPIERMNERLAL  
AEVRQNI DSVHCRANLLIIQPDRCWREEGAEMLEPSESNEWCI AVKIHGVNRI SLKPSEORFYVVRNFT  
HAYILAVDDGLKIEFSDKWDWLLFKELQIEGRERNSQGMIPIPGVNEVSDDMGVIGTYPFSRPPV **PDYIR**  
**MADDEVGRALS RDSVYDL DSEDEQWLTQLNHSDSDRKS AHLNHISYEDFEKMITTFEKDAFNNPEGTSDL**  
**DQILSRYPTLEKDHNVLAVHEYWINKRYKKGVPLLRILQGATLRRGQLSQRSIKKRFSFKRQRSQAGRK**  
**PDICLQDANGAEFEALRRVVEAERAATQAGETA VRLRSRAQRLMAKAELVAYKSIMALRIAEAARISDSS**  
RDLVLTTLTLD

Epc-N  
Coiled coil

## Epc-N SUBFAMILY II

>RnorvegicusXP\_342433  
MVI PVPEAESNVNYYNRLYKGEFKQP **KQFIHIQPFNL DNEQPDYDMDSEDETLLNRLNRKMEIKPLQFEI**  
**MIDRLEKASSNQLVTLQEAKLLLNEDDYLIKAVYDYWVRKRKNCRGPSLIPQIKQEKRDGSTNNDPYVAF**  
RRRTEKMQRTRKNRKNDEASYEKMLKLRREFSRAITILEMIKRREKTKRELLHLTLEVVEKRYHLGDYGG  
ILNEVKVNRSEKELYASPATLHNGNHHKVQECKTKHPHLSLKEEASDVVRQKKKHPKPKAEAVLAPPQ  
PTPETVPVINKSDIKQYDFQSSDEDEFQVPS PASEPEEENDPDGPCAFRRRAGCQYYAPRLDQANNHPC  
ESSELADLDKLRKHLTTLTVPRRCIGFARRRIGRGGRVIMDRISTEHDPVLKQIDPEMLNGLSSSSQT  
IDFSSNFRTNASSKPCENRSLSEILSNIRSCRLQCFQPRLLNVQDIDSEECTSRKPGQTVSSKRVSA  
SVALLNTSKNGISVTGGITEEQFQTHQQLAQ **MQRQQLAQ LQKQSQHSSQO THPKAQSSTSDCMSKT**  
**LDSASAHFAASAVVSAPVPSRSEGSKEQNTGHNNMNGVVQPSGSKTLYSTNMALSSSPGISAVQLVRTV**  
**GHTTTNHLIPALCTSSPQTLPMNNSCLTNAVHLNNSVSVVSPVNVHINTRTSAPSPTALKLATVAASMDRV**  
**PKVTPSSAIISSIARENHEPERLGLNGIAETTVAAMEVT**

Epc-N  
EpcC 7.5e-160

>MmusculusAAH48785  
NVNYYNRLYKGEFKQP **KQFIHIQPFNL DNEQPDYDMDSEDETLLNRLNRKMEIKPLQFEIMIDRLEKASS**  
**NQLVTLQEAKLLLNEDDYLIKAVYDYWVRKRKNCRGPSLIPQIKQEKRDGSTNNDPYVAFRRRTEKMQR**  
KNRKNDEASYEKMLKLRREFSRAITILEMIKRREKTKRELLHLTLEVVEKRYHLGDYGG  
EKELYASPATLHNGNHHKVQECKTKHPHLSLKEEASDVVRQKKKYPKPKAEAGIAPQOQTPETLPVIN  
KSDIKQYDFQSSDEDEFQVPS PASEAE EENDPDGSCAFRRRAGCQYYAPRLDQANNHMCENSELADLDK  
LRYKHCLTTLTVPRRCIGFARRRIGRGGRVIMDRISTEHDPVLKQIDPEMLNGFSSSSQTIDFSSNFRT  
NASSKPCENRSLSEILSNIRSCRLQCFQPRLLNVQDIDSEECTSRKPGQTVSSKRVSAASVALLNTSKN  
GISVTGGITEEQFQTHQQLVQ **MQRQQLAQ LHQKQSQHSSQO THPKAQSSTSDCMSKTLDSASAHFAA**  
**SAVVSAPVPSRSEGSKEQNTGHNNMNGVVQPSGSKTLYSTNMALSSSPGISAVQLVRTVGHHTTTNHLIP**  
**ALCTSSPQTLPMNNSCLTNAVHLNNSVSVVSPVNVHINTRTSAPSPTALKLATVAASMDRVPKVTPSSAIS**  
**SIARENHEPERLGLNGLAETTVAAMEVT**

Epc-N  
EpcC 3.8e-157

>CfamiliarisXP\_533350  
MVI PVPEAESNVNYYNRLYKGEFKQP **KQFIHIQPFNL DNEQPDYDMDSEDETLLNRLNRKMEIKPLQFEI**  
**MIDRLEKASSNQLVTLQEAKLLLNEDDYLIKAVYDYWVRKRKNCRGPSLIPQIKQEKRDGSTNNDPYVAF**  
RRRTEKMQRTRKNRKNDEASYEKMLKLRREFSRAITILEMIKRREKTKRELLHLTLEVVEKRYHLGDYGG  
ILNEVKINRSDKELYATPATLHNGNHHKVQECKTKVNILWGEAHMHPHLSLKEEASDVVRQKKKYPKPK  
KAEALITSQOQTPETLPVINKSDIKQYDFHSSDEDEFQVPS PVSEPEEENDPDGPCAFRRRAGCQYYAP  
RLDQANHSFENSELADLDKLRHRCLTTLTVPRRCIGFARRRIGRGGRVIMDRISTEHDPVLKQIDPEML  
NGFSSSSQTIDFSSNFTRTNASNKHCENRSLSEILSNIRSCRLQCFQPRLLNLQDSSEECTSRKSGQT  
VNNKRVSAASVALLNTSKNGISVTGGITEEQFQTHQQLVQ **MQRQQLAQ LQKQSQHSSQO THPKAQS**  
**STSDCMSKTLDSASAHFAASAVVSAPVPSRGEVAKEQNTGHNNINGVVQPSGTSKTLYSTNMALSSSPGI**  
**SAVQLVRTVGHHTTTNHLIPALCTSSPQTLPMNNSCLTNAVHLNNSVSVVSPVNVHINTRTSAPSPTALKLA**  
**TVAASMDRVPKVTPSSAIISSIARENHEPERLGLNGIAETTVAAMEVT**

Epc-N  
EpcC 3.1e-163

>AmelliferaXP\_397232  
MSKLSFRARALDASKPMPIYMAEELPDL PDYSAINRSLPQMPSGMEKEEECEHHLQRAICTGLI IPTPEV  
TDLTDVEAYDKIYPADY **KLPRQLIHMOPFAMEQDIPDYDMDSEDEKQWVAIQSRKMDLTPLOFEEMDRLE**  
**KSSGQTVVTLNEAKALLKEDDDLI IAVFDYWLNRKRLKTQHPLLLTVKTEHRFGSAANNPYLAFRRKTEKM**  
QTRKNRKNDETSY EKMLKLRDLRAVTLFEMVKRREKTKREHLHLTIEVYEKRYQAQDFNGQILA EVSA  
LKT PRPAFAPLFTNQFGVHQNWANKVCSKDEVVPRKEKRQYKRRKHKTD SRGGSLEDNGVRS GTSGGGGR  
GSRPSVLGGGLDPLISSDEDEGPLPSHSHSQSPVPSDRDDEDIAD EGQFAFRNRNSTYLPPVSGGFGNWP  
WCDKNEGGMADKKYRFALTSISKVPRCIGFARRRIGRGGRVILDR CSTDMDDMWSLDFTIHQPKREP  
DSDTTAMSTTSVKKEWLHFRPKTPPVSVHSPSEESSD TSDIEPILTQSKPLPYFPPEATSICVEVEPD  
RAGDEPPFTSEFN IADYFSPDTLSDFDLAVASITSSACISGSDNNSNDTRTDELGSSHVVTPLPSSLFA

QPATQQSRPQCSGSGFSVVTSTSSIVPSSFSCTINQPTTSTNAVSTQCANAAIETQSNQSKOQOHRQLPN  
NSSPVSILSKSLTSPNTNRNGSSGSGSAGVRVFSASTTTSGTITNFGNGHQNGPLSHINNSNLSNSTH  
VVNNQSTIVLPQKHPPSNLLPGLIAQSKLASLARQQOQTQSASTQQIPTSGEITLNSNSENMDMKVDGV  
ESATCDGKPPQQQLVRANKTNSLAMEVT

Epc-N

>PtroglyodytesXP\_526096

MTEVITAFKEFLPLTAFNLDNEQPDYDMDSEDETLNRLNRKMEIKPLQFEIMIDRLEKASSNQLVTLQE  
AKLLLNEDDYLIKAVYDYWVRKRKRCRGP SLIPQIKQEKR DGSTNNDPYVAFRRRTEKMQTRKRNKND  
EASYEKMLKLRREFSRAITILEMIKRREKTKRELLHLLTLEVVEKRYHLGDYGG EILNEVKINRSEKELYATP  
ATLHNGNHHKVVQECKTKVNIWEEACMDEEASDVVRQKKKYPKPKAEALITSQQPTPETLPVINKSDIK  
QYDFHSSDEDEFPOVLSPVSEPEEENDPDGPCAFRRRAGCQYYAPRLDQANHSCENSELADLDKLRHRHC  
LTTLTVPRRCIGFARRRIGRGRVIMDRISTEHDVPLKQIDPEMLNSFSSSSQTIDFSSNFSRTNASSKH  
CENRLSLSEILSNIRSCRLQCFQPRLLNLQSDSSEECTSRKPGQTVNNKRVSAASVALLNTSKNGISVTG  
GITEEQFQTHQQQLVQMQRQQLAQLQKQSQSHSSQQTHPKAQGSSTSDCMSKTLDSASAHFAASAVVSA  
PVPSRSEVTKEQNTGHNNINGVVQPSGTSKTLYSTNMALSSSPGISAVQLVRTVGHTTTNHLIPALCTSS  
PQTLPMNNSCLTNAVHLNNSVSVVSPVNVHINTRTSAPSPTALKLATVAASMDRVPKVTSSAIISSIAREN  
HEPERLGLNGIAETTVAEMEVT

Epc-N

EpcC 2.7e-163

>HsapiensAAK60500

MEKEE ESEHHLQRAISAQOVFREKKESMVIPVPEAESNVNRYNRLYKGEFKQPKQFIHIQPFNLDNEQPD  
YDMDSEDETLNRLNRKMEIKPLQFEIMIDRLEKASSNQLVTLQEAKLLLNEDDYLIKAVYDYWVRKRKN  
CRGP SLIPQIKQEKR DGSTNNDPYVAFRRRTEKMQTRKRNKND EASYEKMLKLRREFSRAITILEMIKR  
EKTRELLHLLTLEVVEKRYHLGDYGG EILNEVKISRSEKELYATPATLHNGNHHKVVQECKTKPHHLSLK  
EEASDVVRQKKKYPKPKAEALITSQQPTPETLPVINKSDIKQYDFHSSDEDEFPOVLSPVSEPEEENDP  
DGPCAFRRRAGCQYYAPRLDQANHSCENSELADLDKLRHRCLTTLTVPRRCIGFARRRIGRGRVIMDR  
ISTEHDVPLKQIDPEMLNSFSSSSQTIDFSSNFSRTNASSKH CENRLSLSEILSNIRSCRLQCFQPRLLN  
LQSDSSEECTSRKPGQTVNNKRVSAASVALLNTSKNGISVTGGITEEQFQTHQQQLVQMQRQQLAQLQK  
QSQSHSSQQTHPKAQGSSTSDCMSKTLDSASAHFAASAVVSAPVPSRSEVAKEQNTGHNNINGVVQPSGT  
SKTLYSTNMALSSSPGISAVQLVRTVGHTTTNHLIPALCTSSPQTLPMNNSCLTNAVHLNNSVSVVSPVNV  
HINTRTSAPSPTALKLATVAASMDRVPKVTSSAIISSIARENHEPERLGLNGIAETTVAEMEVT

Epc-N

EpcC 5.6e-164

>DmelanogasterCAH70455

MEHHLQRAISAQOVYGEKRDNMVIPVPEAESNIAYYESIYPGEFKMPKQLIHIQPFSLDAEQPDYDL DSE  
DEVFVNKLKKKMDICPLQFEEMIDRLEKSGSQPVSLQEAKLLLKEDDELIREVYEWIKRKRKRCRGP SL  
IPSVKQEKR DGSS TNDPYVAFRRRTEKMQTRKRNKND EASYEKMLKLRRLDSRAVTILEMIKRREKSKRE  
LLHLLTLEIMEKRYNLGDYNGEIMSEVMAQRQPMKPTYAIP IIPITNSSQFKHQEAMDVKEFKV NKQDKAD  
LIRPKRKYEKKPKVLPSSAAATPQOTSPAALPVFNADLNQYDFPSSDEEPLSQVLSGSSEAEEDNDPDG  
PFAFRRKAGCQYYAPHL DQGTGNWPWTSPKDGGLGDVRYRYCLTTLTVPQRCIGFARRRVGRGGRVLLDRA  
HSDYDSVFHHL DLEMLSSPQHSPVNFANTSETNTSDKFSKDL SQILVNIKSCRWRHFRPRTPSLHSD  
NDELSCKLYRSINRTGTAQPGTQTCSTSTQSKSSSGSAHFAFTAEOYQQHQQLALMQKQQLAQIQQQQ  
ANSNSSTNTSQGFVSKTLDSASAQFAASALVTSEQLMGFKMKDDVVLGIGVNGVLPASGVYKGLHLSSTT  
PTALVHTSPSTAGSALLQPSNITQTSSSHSALSHQVTAANSATTQVLIGNNIRLTVPSSVATVNSIAPIN  
ARHIPRTL SAVPSSALKLAAAANCQVSKVPSSSSVDSVPRENHESEK PALNNIADNTVAEMEVT

Epc-N

EpcC 1.1e-159

>DmelanogasterAAC64271

MSKLSFRARHLDP SKQMPIYLA EELPDLPEYSAINRAVPQMPSGMEKEE ESEHHLQRAICTGLI IPTPEV  
LQTDQPFYDAYYPDYKMP RQMIHMQLGLDTEVPDYDMDSADEDWLSQQORLELTELKFEQMMDRLEKS

SGQTVVTLNEAKSLLNQDDETSISVYDYWLNKRLKMQHPLILTVKTESRPGASSNNPYLAFRRRTEKMOT  
RKNRKNDEASYEKMLKLRDLQRATTILEMVRREETKRDHLKMTVNI FEKRVEMRDFNGAVYSELNSQY  
KNTRPAYNPLYTNQYSQGA AVGTAGAILAALPTGLLPGGAGAAGNANVFGSASQYLNSSNLTMDAISGS  
GNGSSRKEKRPYKRRKHKLPRDKQQHQQQQTQQHQQQQYLPASGGAGVSPAHHLP HHLHLSRQQSASP  
AANDSIADSEEDYFYGAGA QNGNKLGESEEEETPFAFRRRSSCVYLPTRQRDGRYPWDSADEDMAPSGAC  
SDAKYRYTTLTSLNYPRPRCIGFARRRLGRGGRILLDRATTNFDDFWSQLDYTVMESVTVNKC RDKIKPGD  
PDQLCKPSSPPTVVDLVPAGKPV DGEHPVPELIKEEPS SDTEKPVAAATESGRESKERELEEK FENDVDDE  
FVASDDENVSR LGIYSSAVTLPQSCADLRQKRRRLRRKKQQLRELNAAKRLKRSSEAVATAEDVQLEDED  
TKPDLRPLPRAYLQRLALILGQKLV EEDDNTVESENVAPELLEMNDPEQLQPPRANHQQHRSNNHNNN  
NTVLNNNNSSSSNV MNKDVSISEKINVIKQEA EELVGGKCEDQP VASTSAAAAAARAAEAAAAEAASST  
TTLAAPNPGPSLEEVAKTIKREMIDADD SNEPLSSIRTAAVMLSTQTSVSELMDDEAEDDVNLAQLSSII  
RHTAVKKELEAQHQHQVQHEQMQAARKMEEDEAAPCLNQLPDVIRLRNIRNSQVHARPKDLFVQAPVDE  
EFNADYMGGLSPTSSQRLDICNELLSEIRRDWLHFRPKTPTDELSDSODCEVGKTCDSHAVDWTQGTPI S  
VELNRLGKREAEESDSSSYFLSSGFKYRDLESDAQLLQTVQAQDYARGSSKSPNC SSGSGS SALEFNLSG  
GDSLNDINNLLGCDEDDNHEHMLDNILQECAMDDPKALNQATNFWNGILDGEEAVDEVEMADQLLDCID  
EKKSKVGAADTSKRAGRNRKARLIQAPVGS SAFTVCPTAETLKERELFFSQAPPVEVPPKEKTPAEVELP  
EVVVKETANLPVKVEAVEK PQSEVL PVAPQPQQLQPAITLPTTQLINIPAQISTQKQHQPQVTQLLNQ  
FANAGPQIIARTEYGGGA AVGDIVTITPHTGSSPLPTLTAQQQLQHQLAQAQLRNVTVQORQATPQNPQ  
NQNPQQQLLFQMQRDP SRSLTPLQAAGAGATGNHLIYTTSCGEIVTAGAAASASQKVTYA IQKAGVSSGG  
ATTASIGPNTVITLSNVKVQND DISSGGSGNSSSVNI INTASGQQLAVHSIAGMQQQGQQVQVTTST  
PLL VATPTRN NVQQQQVQQQPIVWRQVSGTNTAVATTAVLSTTVDS SPKAVTNQILWTSRATQKRQL  
NGPENTDINKLLLNKRLPRKQQIQQQHQQIQLT KQQLQQLVQHEELDDL VATSTGNSGDQMETGDGLQQQ  
QQQQQQQQQLQKLSKVIKMSQFPLLVS DVS LQQQSVSGQAQQQQLKPN SAAAIAANHNYSLHPASTAI I  
TAQATPQOANKIFLTSSNSGGGSAGNF TIATASELQAAAAGQKLHYKELPNSNLKLN FVSSAGTGEQTQ  
QVGATTVLLNKSQQQQQQQHQKLT LATTGNSQTGQDKRVLYTSLLNVKPLQKNNSGOMQMLGPGGL  
QQVLRGLNNSAIITRTLPLGTTVNSTGGAVGPTTTTTIRQLVTTNANNVSSQDGNLLSAKEV GKALTVEQ  
VIASANNGGVVLP TSNNNNNNNGSGAGGNGGPLNSGVNATGAGGGG STGAGVGGAGVTSTINR

Epc-N

>XtropicalisAAH75105

MSKLSFRARALDAAKPLPIYRGKMPDLNDCV SINRAVPQMPTGMEKEE ESEHHLQRAISAQOVFREKKE  
SMVIPVPEAESNVHYYSRLYKGEFKQPKQFIHIQPFNL DYEQPDYDMDSEDETLLNRLNRKMEIKPLQFE  
IMIDRLEKASSNQLVTLQEA KLLLNEDDYLIKSVYDYVWRKRKNCRGPSLIPQVKQEKRDGSTNNDPYVA  
FRRRTEKMQTRKNRKNDEVS YEKMLKLRREFSRAITILEMIKRREKTKRELLHLTLEVVEKRYNLGDFGG  
EILNEIKIPKVEKEIHVIPP SLHNGNHKVKPECKVKNTHHPSVKDEVLEIVRLK KYPKPKPAETLVTPQ  
PQATSEPLAVINKSDIKQYDFQSSDDDEFQVPSPLSELEEENDPDGSYAFRRRTGCQY YAPRLDQMNNDT  
PETTDL SGLARHRYRHCLTTLTVPRRCIGFARKRLGRGGRVIMDRLSTEHDSILKQIDPEMLSGFSSSSH  
VAQPPSSPRTNASDRHCENRSLPEILSNIKSCR LQCFQPRLLHTQDS DREETSRLGQAVNVKRVSA  
LLNTSKNGITVTGGITEEQFQTHQQQLVQMQRQQLAQLQKQSSQSLQQSHPKAQGS AKSDCMSKTLDS  
ASALFAASAVVNSPTPGRSEVNKDQ NAGHSNLNGVVQPSGTAKTLYSTNMALSSSPGI STVQLVRTVGHF  
TTNHLIPTLCTSNPQTLTMGNSCLANTVHLN NVSVVSPVNVHINTRTSAPSPTALKLATVAASMDRVPKV  
TPSSAIISSIARENHEPERLGLNGIADTTVAMEVT

Epc-N

EpcC 4.3e-142

>GgallusXP\_418573

MDIAGAVAVMAGLWLGVPWAACVLLQPVALLSAERWFP SAAVSI GVVGR TADTVMFKHRTRLLHPGFLLG  
NRIRFSCESANDKILKFPLQK GALCVLLEVPDVSTGKAVREDAQDCESGGCSAAFIMSGDCMKQSCFLTA  
PLGERSCCSPSALELSDLMEHHLQRAISAQOVYGEKRD NMVIVPPEAESNIAYYESIYPGEFKMPKQLIH  
IQPFLDAEQPDYDMDSEDEVFNK LKKRMDISPLQFEEMIDRLEKSGSQQPVS LQEA KLLLKEDDELIR  
EVYEWIKRKRKNCRGPSLIPAVKQEKRDGSS TNDPYVAFRRRTEKMQTRKNRKNDEASYEKMLKLRDLS  
RAVTILEMIKRREKSKRELLHLTLEIIEKRYNLGDYSGEIVSEVMAQRQPMKPTYAIP IIPVTNSSPFKH  
QETMELKEYKVNKQDKSDVIRPKRYEKKPKVLPSSAAATPQQTSPAALPVFN AKDLNQYDFPSSDEEPL  
SQVLSGSSEAEENDPDGPFARFRKAGCQY YAPHLDQPGNWPWSSPKEGRLGDVRYRYCLTTLTVPQRCI  
GFARRRVGRGGRVLLDRAHSDYDNTFHQLDLEMLSSSQHSSISQFANTSETNTSDKSF SKDLSQILVNIK  
SCRWRHFRPRTPSLHSDNDEL S LFFFQALQGYEMLCLRRLQLRVFVCLCELSLLRESETSLGLVHQT LN

HSNGSKSLQYSEFTVLPEYHIRLCLEEMLTIMQSKDVIEWLNWRKKMICNYILDDMCLSHFNDDRKNMLL  
TDDDQLMITNENDIQSPYCCSPLSFDRSERFSVVPWLSQKEDEKASQPAGGLLGSSGLCLQVHTGSTALV  
PSAVLGISPD PATAVCYGKLVKGLCVGYHCFSCIWKQEMVFSFDRNSFSEAF TA EQYQHQHQQALALMOK  
QQLAQIHQQQANSNSANTSQGGFVSKTLDVSAQFAASALVTSEQLMGFKMKDDVVLGIGVNGILQASGV  
YKGLHLSSTTPTALVHTSSSSAAGSALLQPSNITQTSSSHLSALSHQASAANSATTQVLIIGNNIRLTVPSS  
VATVNSITTLNARHIPR TL SAVPSSALKLAAATNCQVPKVPASSSVDAVPRENHETEKPALNNIADNTVA  
MEVT

Epc-N  
EpcC 3.7e-142

>XlaevisAAH80994  
MSKLSFRARALDATKPLPIFRGNMDDLNDCVSINRAVPQMPTGMEKEEESEHHLQRAISAQOVFREKKE  
CMVIPVPEAESNVHYYSRLYKGEFKQPKQFIHIITPFNL DYE QPDYDMDSEDETLLNRLNRKMEIKPLQFE  
IMIDRLEKASSNQLVSLQEAKLLLNEDDYLIKSVYDYWVRKRKNCRGPC LIPQVKQEKRDGSTNNDPYVA  
FRRRTEKMQTRKRNKNDEASYEKMLKLRREFSRAITILEMIKRREKTKRELLHLTLEVVEKRYNLGDFGG  
EILNEIKIPKADKEIYAIPPSLHNGNHKVPCKVKNTHHLNVKDEVLEIVRLKPKYKPKPKADILVTPPL  
PQANSEPLAVINRSDIKQYDFQSSDDDEFQVPSPLSELEEENDPDGSYAFRRRAGCQYYAPHLDOMNDT  
PETTDL SGLARHRNRHCLTTLTVPRRCIGFARKRLGRGGRVIMDRLSTEHDSVLKQIDPEMLSGFSSSSH  
IAQPPSSPGRITNADRHCENRSLPEILSNIKSCRLOCFQPRLLHTQDS DREECTSRLGQAVNLKRVSS  
LLNTSFKNGITVTGGITEEQFQTHQQQLVQMOKQQLAQLOKQSQSLQOSHPKAQSGSSDCMSKTLDS  
ASALFAASAVVNSPAPVRSEVNKDQ NAGHSNLNGVVQPSGTAKTLYSTNMALSSSPGISTVQLVRTVGHF  
TTNHLIPTLCTSNPQTLTMGNSCLANTVHLNNSVSPVNVHLNTRTSAPSPTALKLATVAASMDRVPKV  
TPSSAMSSIARENHEPERLGLNGITDTTVAMEVT

Epc-N  
EpcC 1.6e-138

>DrerioAAH48890  
MSKLSFRARALDAKPLPIYRNKDL PDLTDCVSINRAVPQMPTGMEKEEESEHHLQRAISAQOVFREKKE  
SMVIPVPEAESNITYYDRLYKGEFRI PKQLIHIQPLGLDNELPDYDMDSEDETLLNRLNRKMEIKPVQFE  
TMMDRLEKASTNQLVTLQEAKLLLNEDDYLLKSVYDYWVRKRKNCRGPSLIPQIKQEKRDGSTNSDAYVA  
FRRRTEKMQTRKRNKNDEASYEKMLKLRREFSRTISILEMIKRREKSKRELLHLTLEVFEKRYQIGDFTG  
EILNEKVTPLAEKTVYPAPISLPISSRHKTENKIKSHKIGPKHLHPFPVKPEPHFDFVRSHKKNRKPCL  
DTFRQTGWPERIQ TINKADIKQYDFHSSGEEDYPLSPASEPDEENDPDGVFAFRRKAGCSYHAPVVDQSC  
SPHWQQTGDQLWQRNCLTALSVP RR CIAVACRRVGRGGRVVLDR TSSDL D HSLGHLDPDMLYPSAGSCV  
PDLPVHTNTNSHVSQRSLTQLLGDIQACRWKFFRPRPLQDN SRAEDKKGTPPVEKGGGTLSNSVSGGFT  
EEQFQSHQQQLVHMHKQLQQQLQONSTAAEAHLHLHTLDSAGAHFAASAVINTPNNENRPOIASVNGVL  
PNSGFRQVKVNRSAPSGGGGAGGESGSLVRSPLAVPQSLPHGHGHLSTVSAVSPAHTHTARLCAPSP  
SALKLASVASSLDRVPKVTPTSAIDIARENHEPERLALNGLSETTVAMEVT

Epc-N  
EpcC 1.3e-25

>CfamiliarisXP\_535156  
MGTEQGARQRPASLDVKIIAVKVRPKWHPAPT VSGEVSAAPEMSKLSFRARALDASKPLPVFRCELDL  
DLHEYASINRAVPQMPTGMEKEEESGKKRPDLRRYRPRFREGVLPGRYRTKEHHLQRAISAQOVYGEKRD  
NMVIPVPEAESNIAYYESIYPGEFKMPKQLIHIQPFSLDAEQPDYDL DSEDEVFNKLLKKKMDICPLQFE  
EMIDRLEKSGSQPVSLQEAKLLLKEDDELIREVYEWIKKRKNCRGPSLIPSVKQEKRDGSSSTNDPYVA  
FRRRTEKMQTRKRNKNDEASYEKMLKLRRLDSRAVTILEMIKRREKSKRELLHLTLEIMEKRYNLGDYNG  
EIVSEVMAQRQPMKPTYAIP IIPITNSSQFKHQEAMDVKEFKANKQDKADLIRPKRYEKKPKVLPSSAA  
ATPQOTSPAALPVFNADLNQYDFPSSDEEPLSQVLSGSSEAEENDPDGPF AFRRKAGCQYYAPHLDQT  
GNWPWTS PKDGLDVR YRYCLTTLTVPQRCIGFTRRRVGRGGRVLLDRAHSDYDSMFRHL DLEMLSSPQ  
HSPVNQFANTSETNTSDKFSKDL SQILVNIKSCRWRHFRPRTPTLHSDNDELSCRKLYRSINRTGTAQ  
PGTQTCSTSTQSKSSSGSAHFAFTA EQYQHQHQQALALMOKQQLAQIQQQQANSNSSTTTAQN LASNQKS  
GFRLNLHSHSIOGLERALQGFVSKTLD SASAQFAASALVTSEQLMGFKMKDDVVLGIGVNGVLPASGVY  
KGLHLSSTTPTALVHTSPSTAGSTLLQPSNMTQTS GSHSALSHQVTAANSATAQVLIIGNNIRLTVPSSVA  
TVNSIAPINARHIPR TL SAVPSSALKLAAAANCQVSKVASSSAVDSVPRENHESEKPALNNIADNTVAME



VT

Epc-N  
EpcC 3.2e-177

>HsapiensBAC03857  
MVIPVPEAESNIAYYESIYPGEFKMPKQLIHIQPFSLDAEQPDYDLSEDEVFNKLLKKKMDICPLQFEE  
MIDRLEKGGSGQPVSLSQEAKLLKEDDELIREVYEWIKKRKNCRGPSLIPSVKQEKRDGSSSTNDPYVAF  
RRRTEKMQTRKNRKNDEASYEKMLKLRRDLSRAVTILEMIKRREKSKRELLHLLTLEIMEKRYNLGDYNGE  
IMSEVMAQRQPMKPTYAIP IIPITNSSQFKHQEAMDVKEFKVKNQDKADLIRPKRKYEKPKVLPSSAAA  
TPQQTSPAALPVFNAKDLNQYDFPSSDEEPLSQVLSGSSEAEEDNDPDGPFARFRKAGCQYYAPHLDQTG  
NWPWTSPKDGGLGDVRYRYCLTTLTVPQRCIGFARRRVGRGGRVLLDRAHSDYDSVFHHLDEMLSSPQH  
SPVNQFANTSETNTSDKFSKDLSQLVNIKSCRWRHFRPRTPSLHSDNDELSCRKLYRSINRTGTAQP  
GTQTCSTSTQSKSSSGSAHFAFTAEOYQOHOQOALMOKQOLAQIQOQOANSNSSTNTSQGFVSKTLDSA  
SAQFAASALVTSEQLMGFKMKDDVVLGIGVNGVLPASGVYKGLHLSSTTPTALVHTSPSTAGSALLQPSN  
ITQTSSSHSALSHQVTAANSATTQVLIIGNNIRLTPSSVATVNSIAPINARHIPRTL SAVPSSALKLAAA  
ANCQVSKVPSSSSVDSVPRENHESEKPALNSIADNTVAMEVT

Epc-N  
EpcC 1.1e-159

>HsapiensAAH36529  
MSKLSFRARALDASKPLPVFRCELDLHEYASINRAVPQMPTGMEKEEESSEHHLQRAISAOQVYGEKRD  
NMVIPVPEAESNIAYYESIYPGEFKMPKQLIHIQPFSLDAEQPDYDLSEDEVFNKLLKKKMDICPLQFEE  
EMIDRLEKGGSGQPVSLSQEAKLLKEDDELIREVYEWIKKRKNCRGPSLIPSVKQEKRDGSSSTNDPYVAF  
FRRTEKMQTRKNRKNDEASYEKMLKLRRDLSRAVTILEMIKRREKSKRELLHLLTLEIMEKRYNLGDYNG  
EIMSEVMAQRQPMKPTYAIP IIPITNSSQFKHQEAMDVKEFKVKNQDKADLIRPKRKYEKPKVLPSSAA  
ATPQQTSPAALPVFNAKDLNQYDFPSSDEEPLSQVLSGSSEAEEDNDPDGPFARFRKAGCQYYAPHLDQT  
GNWPWTSPKDGGLGDVRYRYCLTTLTVPQRCIGFARRRVGRGGRVLLDRAHSDYDSVFHHLDEMLSSPQ  
HSPVNQFANTSETNTSDKFSKDLSQLVNIKSCRWRHFRPRTPSLHSDNDELSCRKLYRSINRTGTAQ  
PGTQTCSTSTQSKSSSGSAHFAFTAEOYQOHOQOALMOKQOLAQIQOQOANSNSSTNTSQGFVSKTLDS  
ASAQFAASALVTSEQLMGFKMKDDVVLGIGVNGVLPASGVYKGLHLSSTTPTALVHTSPSTAGSALLQPS  
NITQTSSSHSALSHQVTAANSATTQVLIIGNNIRLTPSSVATVNSIAPINARHIPRTL SAVPSSALKLAAA  
AANCQVSKVPSSSSVDSVPRENHESEKPALNSIADNTVAMEVT

Epc-N  
EpcC 1.9e-159

>TnigroviridisCAG05437  
MAVRIRKIPFDLVPVQEHHLQRAISAOQVYGEKRENMVIPVPEAESNITYYESLYPGEFKMPKQLIHIQPF  
SLDTELDPDYDLSEDETFVFNKLLKKKMEISALQFEEMIDRLEKGGSGQQLVSLQEAKLLKEDDELIVKQF  
DYWSRKRKICKSSLLIPVVKQEKRDGSSSTSDPYVAFRRRTEKMQTRKNRKNDEVSYEKMLKLRRDLSRAV  
TILEMIKRREKSKRELLHLLTLEIVEKRNTMPDYGCEVIAEALAQALVQPVYTFPIIPLSNSNQYRHQDH  
LDMKDYKKPEKTEAIRTKRKYEKPKIPLSAPQHSGPSIFSLKDLNQYDFPSSDEEPPFSQIHSGSSEAE  
EENDPDGCFYAFRRKAGCQYYASRQDQDGNWPVWVAPSDGGLGDVRFYRYCLTSLNVPRRCIGLARRRVGRG  
RILLDRAHADVDGVCQLNSDIESAPLASPLPSSLLYGPNTSTSETNTSDPTTCSHHSSLLFTRSPFSKT  
PLDLSQILLNIKSIRWRHFRPRTITHHPLGEGGLSLRGFRDFRSTVSGLTRTLSSGGTNTVNRTGPAPT  
HVLTAEOYQOHOQEQLVLMOKQLEQSOLQANNPTTTITTPNNTQVSGDDDDDDDDQVVRPAIVSKMLDQA  
SAQFAASALVTTDQLLTFKSKEDLVVTGGLNGVVTGAGAYKSLHLLSTPTTHHQNQSTNTTTSVPTFL  
QPSSNSTSPSPAMVVPSSLSSTPSAHAALGILGCGTTNNSTPSSTQVLIIGNNICLSVPTATSLAGRHI  
PRTLGSVPSSALKLSATANLQMPKVSASSVDLGSRDNDHDEKPALNSIADNTVAMEVT

Epc-N  
EpcC 2.8e-45

>RnorvegicusXP\_225457  
MSKLSFRARALDASKPLPVFRCELDLHEYASINRAVPQMPTGMEKEEESSEHHLQRAISAOQVYGEKRD  
NMVIPVPEAESNIAYYESIYPGEFKMPKQLIHIQPFSLDAEQPDYDLSEDEVFNKLLKKKMDICPVQFEE

EMIDRLEKSGSQQPVSLQEAKLLKEDDELIREVYEWIKKRKTCRGPSLIPSVKQEKRDGSSSTNDPYVA  
FRRRTEKMQTRKRNKNDEASYEKMLKLRRDLSRAVTILEMIKRREKSKRELLHLEIMEKRYNLGDYSG  
EIMSEVMAQRQPVKPTYAIP IIPITNSSQFKHQDVTDAKEFKVKNQDKADLIRPKRKYEKPKVLPSSAA  
APQQPSPAALPGFSKADLNQYDFPSSDEEPLSQVLSGSSEAEENDPDGPFARFRKAGCQYYAPHLDQTG  
NWPWTSPKDGGLGDVRYRYCLTTLTVPQRCLGFARRRVGRGRRVLLDRAHSDYDSMFHHLDDLMLSSPQP  
SPVNOFANTSETNTSDRPSKDLSQLVLDIKSCRWRHFRPRTPSLPDSDSGELSSRKLHRSISRAGPAQP  
GAHTCSASTQSRSSSGSTHCAFTAEOYQHQOQLALMQOQOLAQTQOQOANSSSSTAAPQNLASNOQTRG  
SGLNVQGLERTLQGFVSKTLDASAQFAASALMTSEQLMGFKMKDDVVLGIGVNGVLPASGVYKGLHLS  
TTPTALVHTSPSTAGSTLLQPSNITQTSGSHSALSHQVTAANSATTQVLFGNNIRLTPVSSVPTVNSIAP  
INARHIPRTL SAVPPSALKLAAAANCQVSKVPSSSSVDSVPRENHESEKPALNNIADNTVAMEVT

Epc-N  
EpcC 8.7e-171

>HsapiensAAK60501  
MEHHLQRAISAQOVYGEKRDNMVIPVPEAESNIAYYESIYPGEFKMPKQLIHIQPFSLDAEQPDYDL DSE  
DEVFVNKLKKKMDICPLQFEEMIDRLEKSGSQQPVGLQEAKLLKEDDELIREVYEWIKKRKNCRGPSL  
IPSVKQEKRDGSSSTNDPYVAFRRRTEKMQTRKRNKNDEASYEKMLKLRRDLSRAVTILEMIKRREKSKRE  
LLHLEIMEKRYNLGDYNGEIMSEVMAQRQPMKPTYAIP IIPITNSSQFKHQEAMDVKEFKVKNQDKAD  
LIRPKRKYEKPKVLPSSAAATPQOTSPAALPVFNADLNQYDFPSSDEEPLSQVLSGSSEAEENDPDG  
PFAFRKAGCQYYAPHLDQTGNWPWTSPKDGGLGDVRYRYCLTTLTVPQRCIGFARRRVGRGRRVLLDRA  
HSDYDSVFHHLDLMLSSPQHSPVNOFANTSETNTSDKFSKDLSQLVLDIKSCRWRHFRPRTPSLHSD  
NDELSCRKLYRSINRTGTAQPGTQTCSTSTQSKSSSGSAHFAFTAEOYQHQOQLALMQOQOLAQIQOQO  
ANSNSSTNTSQGFVSKTLDASAQFAASALVTSEQLMGFKMKDDVVLGIGVNGVLPASGVYKGLHLSSTT  
PTALVHTSPSTAGSALLQPSNITQTSSSHSSALSHQVTAANSATTQVLIGNNIRLTPVSSVATVNSIAPIN  
ARHIPRTL SAVPSSALKLAAAANCQVSKVPSSSSVDSVPRENHESEKPALNNIADNTVAMEVT

Epc-N  
EpcC 8e-161

>MmusculusAAC64272  
MEHHLQRAISAQOVYGEKRDNMVIPVPEAESNIAYYESIYPGEFRMPKQLIHIQPFSLDAEQPDYDL DSE  
DEVFVNKLKKKMDICPLQFEEMIDRLEKSGSQQPVSLQEAKLLKEDDELIREVYEWIKKRKTCRGSSL  
IPLVKQEKRDGSSSTNDPYVAFRRRTEKMQTRKRNKNDEASYEKMLKLRRDLSRAVTILEMIKRREKSKRE  
LLHLEIMEKRYNLGDYSGEIMSEVMAQRQPVKPTYAIP IIPITNSSQFKHQDATDSKEFKVKNQDKAD  
LIRPKRKYEKPKVLPSSAAAPQOQSPAALPGFSKADLNQYDFPSSDEEPLSQVLSGSSEAEENDPDGP  
FAFRKAGCQYYAPHLDQTGNWPWTSPKDGGLGDVRYRYCLTTLTVPQRCLGFARRRVGRGRRVLLDRAH  
SDYDSMFHHLDDLMLSSPQSPVNOFANTSEPNTSDRSSSKDLSQLVLDIKSCRWRHFRPRTPSLPDSDS  
GELSSRKLHRSISRAGAAQPGAHTCSTSTQNRSSSGSAHCAFTAEOYQHQOQLALMQOQOLAQTQOQOQ  
ANSSSSAAAQOQGFVSKTLDASAQFAASALMTSEQLLGFVKVDDVVLGLGVNGVLPASGVYKGLHLSSTT  
PTALVHTSPSTAGSTLLQPSNITQTSGSHSSLSHQVTAASSATTQVLFGNNIRLTPVSSVPTVNSVTPIN  
ARHIPRTL SAVPSSALKLAAAANCQVSKVPSSSSVDSVPRENHESEKPALNNIADNTVAMEVT

Epc-N  
EpcC 2.4e-144

>MmusculusNP\_081773  
MSKLSFRARALDASKPLPVFRCELDPLHEYASINRAVPMPTGMEKEEESHHLQRAISAQOVYGEKRD  
NMVIPVPEAESNIAYYESIYPGEFRMPKQLIHIQPFSLDAEQPDYDL DSEDEVFVNKLKKKMDICPLQFE  
EMIDRLEKSGSQQPVSLQEAKLLKEDDELIREVYEWIKKRKTCRGSSLIPLVKQEKRDGSSSTNDPYVA  
FRRRTEKMQTRKRNKNDEASYEKMLKLRRDLSRAVTILEMIKRREKSKRELLHLEIMEKRYNLGDYSG  
EIMSEVMAQRQPVKPTYAIP IIPITNSSQFKHQDATDSKEFKVKNQDKADLIRPKRKYEKPKVLPSSAA  
APQOQSPAALPGFSKADLNQYDFPSSDEEPLSQVLSGSSEAEENDPDGPFARFRKAGCQYYAPHLDQTG  
NWPWTSPKDGGLGDVRYRYCLTTLTVPQRCLGFARRRVGRGRRVLLDRAHSDYDSMFHHLDDLMLSSPQP  
SPVNOFANTSEPNTSDRSSSKDLSQLVLDIKSCRWRHFRPRTPSLPDSDSGELSSRKLHRSISRAGAAQ  
GAHTCSTSTQNRSSSGSAHCAFTAEOYQHQOQLALMQOQOLAQTQOQOQANSSSSAAAQOQGFVSKTLD  
ASAQFAASALMTSEQLLGFVKVDDVVLGLGVNGVLPASGVYKGLHLSSTTPTALVHTSPSTAGSTLLQPS  
NITQTSGSHSSLSHQVTAASSATTQVLFGNNIRLTPVSSVPTVNSVTPINARHIPRTL SAVPPSALKLAA

AANCQVSKVPSSSSVDSVPRENHESEKPALNNIADNTVAMEVT

Epc-N  
EpcC 2.4e-144

>ZmaysAAM13423  
MSRLSFRPRPLDIHKKLPILKSVREFEDEEPIAPLSSARAGVLLRHSGADFTASGANNATEGEGNQALS  
KKNQAEIPTPQFDGVDTYERDYTRTFQAQPTSYIRGRGARAEIGEFVEYDLNEDWLEEFNSERKNINP  
EKLEALLFKLEVLDRARERAGAITPTFIGPVPVLLQLDAAMEALQYLSVRNAVFOAVYNYWKS KRERWQ  
KPILRRLQPPPPVNDTNPYNVFRPREKAHRLHTRRMQRRENNIQSFEKLRVRRNLEQAKALMDALIKRE  
ETKREAMECQVNLQORVQMKYKHEAQLVEDGTTLSGFQQTSSRFESSDDDDVSDDDTATEQTYIRPAVFHPR  
FSANKLSVIPPLRIKRERELKRRPQONGCVFKRDPEEPVFLFTRPLDPEKLVAAAGIKPPDPPIENGATS  
PPFRRCRGRIGGGRIIFDRWNPLLRTPIDQETYYVVPYGHRPPSPEG

Epc-N

>OsativaBAD03206  
MSRLSFRPRPLDIHKKLPIVKSARELEDETTLALRAAPPVLRHSQPEPAADGEAHTSSKKNVQEIPTP  
QYDDVDTYERDYTRTFQAQPTSYIRARGARAEIGEFVEYDLNEDWLEDYNNERKNLNPEKLEVLFLFKL  
ETLDHKARERAGIITPTFLGPIPVILQLDSAMEALQYLSVRYAVFOAVYNYWKS KRERWQKPILRRLQPP  
PPVNDTNPYNVFRPREKAYRLHTRRMQRRENSVQFDKLRVRRNLEQAKALMGALIKREERKRETMCE  
VHLRRIQMRYKHEAQLIDDGIALSGLQQAGSSEDDYADSDDTANEQPYVRSVAFHPRFPDNKLSAVPPLR  
LKRERELKRRPHQNGWLFKRVPEMRDPEEPVMLFTRPIDPKLKMAGIRPPLDPPIDSGTTAPPFRWQAR  
IGRGGRIIFDRWNPFLOVPVQETNHRPSMPEG

Epc-N

>DpseudoobscuraEAL25124  
MSKLSFRARHLDPKQMPIYLAEEPLDPEYSAINRAVPQMPSGMEKEEESHHLQRAICTGLIIPTEV  
LQTDQPFYDYTYPPDYKMPROMIHMQLGLDTEVPDYDMDKADMEWLSQERLELTELKFEQLMDLLEKS  
SGQTVVTLNEAKSLLNQDDETSISLYDYWLNKRLKMQHPLILTVKTESRPGASSNNPYLAFRRRTEKMOT  
RKNRKNDEASYEKMLKLRDLQRATTILEMVRREETKREQLKTTVNI FEKRVELRDFNGAVYSELNAQY  
KSTRPAYNSLYTNYSQGAAA AVGTAGAILAALPPGLLASGGAAGNTNVYASPSQYLNTSTMDTIHSGSG  
NGNGNGSSSRKEKRPYKRRKHLPRDRSGSAPHLPHHLHNL SRQOSASPAANDSILDSEDDDYLNGLL  
NGNLGSESEDEAPFAFRKPCSIYLPTRHRNWRPYDSADEETETSRSSTGPYSDPKYRYTLTSINYPSP  
RCIGFARRRVGRGRILLDRATTNFDDVWSQLDYTMESVVKSNNAQRRNNQLSKPELLPLAKPCSPPTV  
VDLVVPTSKHIDSVDATSLPPDAIVKSEPTSHSVDKPIAGGSAGDSLPLPLDKEVDAEVL DLDGEEDDL  
VTDDENVSRLSFYSSAVTSLQSSHDMRLKRRRLRHKKQOMRELNAAKRLKRSDDAAATGGTGGEPAAAGGE  
EGPFTAPLCPLPRAYLQRLVLALGQKLQEEAMEVCENLAPQEEKSSAAEELQOPAPPRANNQHHRSSS  
SNMNKDVSISEKINVIKLEAEGNEDVGREQP VASTLSMLGSPMEDVAKTIKRELIDADDSNEPLSII RTA  
TVAATVLQASPDPELMDDEAEDDVNLAQLSSII RHTAVKKELEAGYGPQELKEETVCLNQLPDVIRLQN  
LRNAQTC SKPRDLYIDATAEDMDVDYLGGLSPTSSQRLDICNELLSEIRRDLHFRPKTPTDELSDSNDG  
EGKPCGDSGVHAVDWTQDTPISVELNRLGKQEEIESDTSYFLSNAFKYTDLSDAQLIQ TAYAQDYARG  
TSKSPNC SSGSGSGSALEFNLSAGDSLNDINLLGDDEDDNHEHMLDNILQECGMDDPKALNQATSFWN  
GILDGEEAAVDEVEIADQLLDCIDEKKPKVGGEASKRAGRRLKRPVNVVPGSSSLFTVCPTQESLKNREVF  
FSQEVVTPKEEPQPATETETAPIINIPAQIIPQKQMAQIQ TQTQQLQLOQSQTAQVQAQTAPQOVTQLL  
NQFANASQIIARTEYGGGA AVGDIVTITPHTGSSPLPTLSAQOQLQHQLAQAQLRNVTVQORQGTPOQV  
QVQQQQOQPTQQLLFQMQRDGIGSPVITTSIVTSSRSLTPLNAAGAGAAGNHMIYTTGSGEII TAAAAA  
AAQKVTYAIQKSSSGGGGATTTSIGPNTVITLSNVKLSDDNCSAGGAGSGSSVNIINTASGOQLAVHSI  
AGSTTTTPLIVTTPTRNNVVQOHSQOQLVQOQPIVWRQVSGTNTAVATTAVLSTTADTSPA AVGNKILWT  
SRGTQKRQLNGPENTDINKLLNRKFSQRKVI GQHPGGGQOIQOQAQOQIQ LTKOQLQOLVQHEDDLVTA  
TTTINSGDQMDTGESLQOQH HQQLQKLSKVIKMSPFLLVSDLNL PNSAAAIAANHNYSLQPATAIIS  
SQAAPQOANKIFLTSSNSGGGNFTNFTASELQAAAAVAASNAGGQKLHYKELTNSNLKLNFSSTGEA  
LASQAPQOQV GATTVVLNKAQQOQVHHQKLTVAANAQQVQOQGDKRVLYTSLLNKPLQKNNSGQMOMQL  
GPGGLQOQLRGRVNSSIITRTLPLGTTVNSSAGGGAGGAPATIRQLVTTNTNNVGS SDGALLSAKDVGKS  
LTVEQVMVSANNGGVMMPTSNNNNNNGSG

Epc-N

>OsativaBAD29358

MSRLSFRPRPLDIHKKLPILKSAREFEDDDPTAAAVAVARAGVLLRQSAPELTAATTATEGEGNPTPTKK  
NIQEIPTPQFDAVDTYERDYTRTFAQPTCYIRGRGARAEIGEFVEYDLNEDWLEDFNNERKNLNPEK  
LEVLLFKLEILDHKARERAGAITPTFIGPVPVLLQLDAAMEALQYLSVRYGVFQAVYSYWKDKRERWQKP  
ILRRLQPPPPVNDTNPYNVFRPREKAHRLHTRRMQRRENNIQSFEKLRMVRRLDQAKALMDALVKREET  
KREAMECEVNLRRIQMKYKHEAQLVDEGTALSGFQOVSSRFGSSEDDYADSDDTTTEQPYIRPPVFRPRF  
ADHKLSVIPTLRIKRERELKRRPQONGWVFKRDPEEPVLLFTRPLDPEKLLAAGIKPPPDPPIENGATMP  
PFRCRGRIGRGGRIIFDRWNPLLQTPIGQETSYYVPYSRRPPSPES

Epc-N

>AthalianaBAC42110

MSRLSFRPRPLDIHKKLPILKSFKDFEDDETPTSTTRNSQLLRIASVEVDNEVAPVPSKKPASEIPTPQF  
VIVDTYERDYSPTFGQPASYLRARGARSELGEFVEYDLNEDWLYEFDKDKKELPPEKLEIIIFKLEV  
LDHKTRERAGVITPTLGSVPVLLQFDAASDVLQVLSINYGTFOAIFNYWKEKRKRWQKPIILRRLQPPPP  
VNDTNPYNVFRPREKVHRLHTRRMQRRENNVQSFEKLRQVRRNLGQAQSILEALIKREEKRDVMDSEVS  
LQRIQLQYRHETELLEDLAMPGFQPTTTSYKFGSSDDELMDSDDHSTSTRVTRPAVIPSSRFNLNLNA  
SHPGGIKQEVRRRQSQHGLHRLDPNEPVMFLFTKPLVPDKLAAAGIVPPTPDSSPGQPPSRFQGRIGRGG  
RIIFDRWNPLMQSHINCGNSYYIAPNHRSTNFD

Epc-N

>NcrassaEAA31357

MATRKVRYKKLSVKTQLAVLREDQIEASEYESLTSENOIATGVEQAEENEYHLQAVLKGAGVAADQEI  
PPPQOSELDYDQFYPOKVAKTSTYIRFSQTVEECISCLYDMTEDETFLLKSYNMKLTSPARLSEDDFERI  
MDVYEDMAANITPFSaidQTVPSYQEMLRGLEPLDSTKVMVHAKQIYEYKSRREISKNRPLNPTLKFET  
HAESDELDPYVCFRRREIRQTRKTRARDVQSADKLRKELEEGRQLILAAHNRELLKADMLKVERAIF  
DQRAI I KEQKRLRLGIRTGEDLVNQPKQKRKAPEAPSAQRPPPPQIRMPVRPDGRPAESDLVQLSDRLA  
EKNAELIIEIEKKIQNHIDWNKNYVDLTGKPLSPVQGRQDLGFRPAKTQYLMTPPASASSGSMDEPTM  
DLDKPKPNPPPPVKFRGVAQDEQSLAHPPSYRRRIGRLNRLWIDRRGLPSPARDLSEEQSDRWKYDQSSD  
DEDDAPVYMLDPFDTKALRYRASIPLOTVTRPPPPVINRQFIPPGAVPQOLAQSSFAPGQPOQPOQPN  
QSQSLPLPQOPQVPAQOPQOPQOPQOPVVS

Epc-N

>PyoeliiyoeliiEAA22977

MQSLENSSELKDEKKKKRRDIAIPRFKICENDDYKLTTFEKPHTHYIRYELYRDQVTGIRLSDGCI IHYD  
LLKEDEIFLESLSYMNIIHVSNDDFCKLMDKFEKLTGYSENKEEINLKDALNAASELKINYKSNI IKDIH  
TYWKAKRKKLGRPLLRMFWNNAQNILSHYSVFRSRVKEKMTLRKHKKKNGEVIVKMQELIEDFKRLDRIL  
RKMKQRDEKLLLLQLNSILFDQRKNEIKDKTYVCPMWDYFKDYKIDKIYKKFKKDKHYKNLHANNNHVH  
HHNHNHNSIHSRKINKKNDTIKSSSEHMYSSRKINPNEYKNVVLIKRRGRNNRLWIDRKYINNEMD  
NVNDLNYCDLSYVINDHNDPPSNLKKNYNDNMDNDPASTKKHPIKLDIKSTDLKYLDSNFFSNTNKN  
TLTTSYGDKIINGVDGENQGINMIEKINETKKEKRRKRKKENNNEDMSFDNKTTFPPLETYKNSLGL  
VKRENMPIFVDEFKDMGQTRRDNRDGYICNIQNNGNDYGVSDMIENNEITLDNNYVYEKNKLDENINEN  
KRAEAIIRGGSQNIIGGLYDEYYDNNVEMGNKIKKVPTSVNNINSVNEGSNINEVEKNNNLFYPNMRHNNK  
TIFQFDDI INPHINRNDYLFCLIKKEMILLKTLRKILHKILK

Epc-N

>PbergheiCAH98686

MTKSAGNHGKAAKGKGLDINKKFLI IKSSEDIKLIKNDNPTNEEISEMQSLENSSELKDEKKKKRRDI  
AIPRFKICENDEYKLTTFEKPHTHYIRYELYRDQVTGIKLNDGCI IHYDLLKEDEIFLESLSYMNIIHVS  
DDFCKLMDKFEKLTGYSNKEEINLKDALNAASELKINYKSNI IKDI XAYWKAKRKKLGRPLLRMFWNNA  
QNILSHYSVFRSRVKEKMTLRKHKKKNGEVIVKMQELIEDFKRLDRILRKMKQRDEKLLLLQLNSILFD  
QRKNEIKDKTYVCPMWDYFKDYKIDKIYKKFKKDKHYKNLHTNHNHMHNNHHYHSIHSRKINKKNDTLN  
NFSFSEHMYNPRMTPNEYQNVVLIKRRGRNNRLWIDRKYINNEMNNVNNLNYCDLSYVINDHIDSS  
NLKKNYNGMGNPDSSTKKHPIKLDIKSTDLKYLDSNFFSNSNKNTITTTYADKISNGVDGENQGINM

IEKINETKKEKKRRKRKKKENNEDTFSGNKTTNFPPLETYKDSSGLVKRENLPILIDEFKDVQSHHDN  
RDEYICNIQNNNGNDYAVSDMIKNEITLDNNYVYEKNKLDENINENKRAMEAIRGGPQSIGGLYEEYDN  
NVEMGSKIKKVPTSVNNINSVNEGSNINEVEKNNHLFYPNMRHNNKTIQFDDIINPHLNRNDYLFCLSK  
YASVQKRILFYLENILNFDTFNFKSKKGDDSAQNPSKNTSQNSQINIPPANNDIVKNAGETKCD

Epc-N

>ChominiseEAL37343

MSQTSTRNARPKTLDPQKKLQVVFSSISOLEKALEEGNDKLEPDEVNRIIDEEKQRIQEVINQMRAKEKEK  
SSQKQSTGNDSVSSSTSKDKDNSNTNSHAGSATSSGGSSCAGGLGGSSGSLSGAAASSILVPPVEICPL  
NVPKLIAFQRPHEHYIRFPVHKEFVSGIRLEDGTVVHYNMVKIDEEFLQSLSEHMKVGVSSEDFIKMIDFM  
EKSTGRGSEISFDEALQICREGLSSIKNQALLIYKYWRMRRHKLKGPLLRHFWPITSPHDSSPYACFR  
PRVREKMTLRRPRRNKETLEKLEKLLDDFRKVEKSFRLRQRDEKLLLAELDTCIFDQRRHEITDPFY  
RCPIWDRLKNYKQQRKHKEMRGVSQLSIGTGAGGSIAQLFTGGVMGLTAGSPLLIQGGDFSSSFNFG  
DLSMFIKKLSSEIGNLDMLLKYSWENETSLLSYYYYGSLQLTSSIFNVFRTYAGKQDHTEAIKNGENTDQ  
SFSVMSDGNKGEVIMAQTPGRSSNIESAKLNEDCQRSQENQAQPGPSPAFCRIAI PN YIQSIYKNGVDLA  
RLEPLQSLRTPCRPHRLVRRRGRGGRIWFDRHLLFQDNFEPHFTDPDKL DLASNCGGSNQFI ISSYFRKT  
ASMCDLIDELCTEGNFDPPFGNSSNGNNTQGISVSISSSSNNTGIHSSMNDLPKSTIRLSGTMNPNNSNL  
GAASMPINPVIQVNNNTNSAAGFSTGNQNPTRNSIPRNASYLDAEMTC

Epc-N

>MgriseaEAA55275

MATRKVRYKKLNVKTPLPVLLFSEIDSNEYEALKNEQIQTGVEAEENEYHLQAVLSTTGVAADKEIPVT  
QTQESNINYDELYPTKFVEPTNYIRFSQTVVEECIGCPYDMTEDDEAFLAKYNKDLAAGTAALSEDDFEKI  
MFVVEDTASVQAPYAAVDNTVVSYDHMVPPLTELELPRMLHAKAIYEHWKSQRQAKKGPLHPSLKFETH  
QESDDLDPFVCFRRREVRQTRKTRARDTQIADKLRRLRELEEGRELIALAHGREVMKREMLNVDRAIFE  
QRCNVKVKIKLGIKTDDDELNTKPKQKPAEAQPVQORAAAGPARVAPRSDTRASDVLGLLSELKAQ  
REEEMRVDIETKIENHKKWNEKYVDLTNSSLVDKPKPETEQEPDPAKWRPVKVQYLMTPPNSASAEDLEEP  
TPMELDAPAPAPVRRFHGLSADDEDYSPDMEYRRRVGRLNRLWVDRRPVKKQLVDVVPTRFPVVS DRWK  
YDCSSDDEDSVYEVDPFDLRALKFRATIPLGSAAPRRIEGSAAAPVTNGTARPALPWSGGGQPPSQQPQ  
QQQQQPQPQPQLQMQQSA

Epc-N

>CparvumEAK87670

MSQTSTRNARPKTLDPQKKLQVVFSSISOLEKALEESNDKLEPDEVRSIIDEEKQRIQEVINQMRAEEKEK  
SSQKQSTGNDSVSSSTSKDKDNSNTNTHAGSATSSGGSSCAGGLGGSSGSLSGATASSILVPPVEICPL  
NVPKLIAFQRPHEHYIRFPVHKEFVSGIRLEDGTVVHYNMVKVDEEFLQSLSEHMKVGVSSEDFIKMIDFM  
EKSTGRGSEISFDEALQICREGLSSIKNQALLIYKYWRMRRHKLKGPLLRHFWPITSPHDSSPYACFR  
PRVREKMTLRRPRRNKETLEKLEKLLDDFRKVEKSFRLRQRDEKLLLAELDTCIFDQRRHEITDPFY  
RCPIWDRLKNYKQQRKHKEMRGVSQLSIGTGAGGSIAQLFTGGVMGLTAGSPLFIQGGDFSSSFNPG  
DLSMFIKKLSSEIGNLDMLLKYSWENETSLLSYYYYGSLQLTSSIFNVFRTYAGKQDHTEAIKNGENTDQ  
SFSVMSDGNKGEVIMPQTPGHSNIEPAKLNEDCQSQENQAQPGPSPAFCRIAI PN YIQSIYKNGVDLAR  
LEPLQSLRTPCRPHRLVRRRGRGGRIWFDRHLLFQDNFEPYFTDPDKL DLASNCGGSNQFI ISSYFRKTA  
SMCDLIDELCTEGNFDPPFGNSSNGNNTQGISVSISSSSNNTGIHSSMNDLPKSTIRLSGAMNPNNSNLG  
AASMPINPVIQVNNNTNSAAGFSTGNQNPTRNSIPRNASYLDAEMTC

Epc-N

>AnidulansEAA57907

MTRYAGLRTRPKKLTTPKAPIPIYREHQIDDLEEEIQNGLQOVETGVEKAESEYHLQVAINAVASGRVV  
NEAHIPTPETVLSNLQYDELYPPVFSQPATYIRFSSTVEDCCGCPYNMTDEDDVFLKIMNEKRDPADRCT  
EDQFEEVMNFEEETVRLKQPYAAVGSAPVLSFAEMQESMDATVEDYVRRLAKDVYDHWKTRRLNNGNQSL  
LPSLKFETGAETDDTDPYVCFRRREVRQVRKTRGRDAQSADKLRRLRKELEDARQLVALVRQRELARKEM  
LATERILFLQRAEVKDMKRKLNKDDDEDLINOQPKKKPIEAPPMQRPAQAQLRMPKPGAQAEDLQLL  
EDVQAEEKENEIIRDIKANI AKHMKWNEGYVDFTRAPLSPSPERTVDISFRPAITTLQPTPPSSDSENTP  
DLALDMSGTVSYRDKLDEHALIMSEDANKMPSFRRIIRGGRLRIDRRNFASRCRVELDPWKADRKFYDQ

EDSDEDLDYEMDQYDISLMQNRAIMLAKARDOAHAQAQAQVRRLOAEQAALNNLNSGQTSQOTMGSNPG  
PGAIAPT PET

Epc-N

>GzeaeEAA76124  
MSSRKVRVKKLNVKTTLPVLRDQIDPNEYEALTTDNQIATGVEQAEENEYHLOQILKEAGTSNDQEI PV  
PPPQESDINYDDLVPVPHKPSYIRFSQTVEECITCLYDMTTEDDEFLLKQYNSKPPATGVLSDDFEHI  
MEVFEDTAAEQTPFAAVDNTVAAYDMMLPGLTHLNQSVSTDLQHAKPVYEWKSRQAEAGNKPLHPSLK  
FETHQETDDTDPFVCFRRREARQTRKTRARDNKIAETLKKLRRELEDGRQLVLLAYEREMVKREVMSMDR  
AIFEEARLKDMLRLGIGKGEDEDLVNQKPKRKPVEPPVVRQPTGAHLRQPVRSDGRTL DADLVLLSDK  
LAEKETELRLDIEMKVQNRKWNQNHIDL TREPLSPVKEQGTEVKFRQAKTQYLMTPPASTSSEMEVDEI  
APDAMQLDKRESSVFOFTAGSGEQSKGSQPAFRRRIGRLNRLWIDRRGMVTPPRELGEDRSRDKYSDS  
DDEEPPVYEVDPFDTRALKFRATIPLNPMFRGRPAVPEAVAAAQAQAGNRVLPSPAAAAHAHAQAHA  
QAAAAHLAAQAQAKAQAQAQAQAQEQSGGPLGKVDKPGGHI TRRVYYLVADEGIARSFGAGGRFSG  
LNVGQIACL MARVE

Epc-N

>PchabaudiCAH77616  
MTISAGAHGKAAKGLDIHKKILIIKSRDDIKKLIKNDNPTNEEIDEMQHLLENSELKDEKKKKKRDI  
AIPRFKICENDDYKLTKEKPTHYIRYELYRDQVTGIKLNDGCI IHYDLLKEDEIFLESLSYMN IHVSS  
DDFKLIDKFEKLTGYSDSKEEINLKDALNAASELKINYKSNI IKDIHTYWKAKRKKLGRPLLRMFWNNA  
QNILSHYSVFRSRAKEKMTLRKHKKNGEIIVKMQLIEDFKRLDRILRKMQRDEKLLLLLQNSILFD  
QRKNEIKDKTYVCPMWDYFKDYKIDKIYKFKKEKHYKNLHANNMHYHHHHHHHSILSRKISKQNDTLK  
SSSFSEHMYNPRKSNHNEYKNVVLIKRRGRNNRLWIDRKS INNNEMNMSDLNYYCDLSYVINDHINPSS  
KFKKNYNDTIGNDVSSTKHHIPIKLDIKSTDLK

Epc-N

>SjaponicumAAW27112  
MSKVSFRARQIDFNKPLPILKHGSELFLEISENALVNRGVPQIPSGMEKEEENEHFFLEVIQALQRTDS  
DVKIPVPEIIDKENDYKRVYDPGFCLPKQLLHIRTIVFSEEEPIEYDMSEDEEWFRRKSDLGITPEKFES  
MIDRLERGCQKVMNLEEAKYLLQDQPSLVI AVYDYWLNKRVQSRQPLLYAVRQERRDGGSNTPYVAFR  
RRSEKMQRTRKTERVMNSRTRC

Epc-N

>HsapiensCAH18228  
MVIPVPEAESNIAYYESIYPGEFKMPKQLIHIQPFSLDAEQPDYDL DSEDEVFNKLLKKKMDICPLQFEE  
MIDRLEKGGSQPVSLQEAKLLLLKEDDELIREVYEWIKRKNCRGPSLIPSVKQEKRDGSSTNDPYVAF  
RRRTEKMQRTRKNRKNDEASYEKMLKLRRLSRAVTILEMIKRREKSKRELLHLTLEIMEKR

Epc-N

>AthalianaAAG10815  
MSRLSFRPRPLDIHKKLPILKSFKDFEDEDNPSSITRNSQLLRISAVEVVDNEVQPPVPSKKLISEIPTP  
QYLVDYTYERDYSRTFNQPSYLRARGARAELEFVEYDL DNDWWWLYEYNKEMILSPEMLEIVIFKL  
EVL DHKARERAGVITPTLGLPVPVLLQPDAAAGEALKYLSIKYGVFHAIYSYWKNKREIWQKPIRLRLOPP  
PPVNDTNPYNVFRPREKAHRLHARRMQORENNAQSFEKLRQVRRNLDQAKTILEALIKREEKRRDFMASE  
VSLQRIQLKYKNETELLEDLALAGFPLSTAYRFGSSEDEFMDSDDPTTTQTCTRPSFTPHRRFTDSNLA  
RAQAGSIKQEARRLGWLHKLNPNEPVMFLTKALVPDKLAAAGIIPPSDARSGRARFQGRMGRGGRIVFDR  
WNPLNQAHINCNTLYIAP

Epc-N

>PfalciparumCAD52313  
MTKGGSNHKNKIKPIDINKLLI IKCND DIRKLINKESPSVDEINEIKNLLENNEVKIEKKRNIVIPR

FKICEDNNINDDEKRKDNINNDAEKNKSLSDNNNNNNNNNNYDYDNDDEKKYSITKFEKPSHYIRYELY  
KDQVTGIKLSDGSI IHYDLLKEDEIFLEGLNSYLNHVNDEFSKLIKDFEKL TGNSDNKEEINFKEALK  
AASDLKINYKSNVIKDIYTYWKNKRKLLGRPLLRMFWNNSQNSLPHYSVFRPRVKEKMTLRKHKKKNSEI  
I IKMQELIQDFRRLDRILRKIKQRDEKLLLLQLNAILFDQRINEIQDKTYVCPMWNFYKDYKIEKIYKK  
FKKDKYYKNSYHHHNNNSNNKYYYDEKEYENYNF DANEDGYVNHNYMDEYMNNDMDEYLNNDIDAHS  
YNYRDSIYNRKINKKLYI IHPEQKNVLKINPSEYKVVLIKRRGRSNRMVWDRKYVDENNINHEINY  
CDLSYAFNDFVEASLTLKKNYEEDVSNYLSGRTRIP IKLDIRKRD LKNVGFNTSLFCNNQIHDDSLFNG  
MYDELNGERKRRKRRKKEQENLV DENYINSNILLDNMGDQFALQANNIHLDKTKASLNDNNNNNIIIC  
NNNLDIIQKNSTTVNVVDSNMNTTNIIVTCDRSTSITNDHDANNTDIKLN YFINKGNKINMNEPDYNTNLL  
FHKNNTEENMLNQYIQNKNNLYNINNINNINSNIKINEDNTKMSHNILSLEHQNLKNQDFYKYSTNI  
TNNYNNNNNNNIPYPLVSRNDKYAPCIFSKEQNNKTIHFEDMIDPLMNKDNYLFCLSKYVYVQKKILFY  
LEHLLNF DNYNFKSKKELPNKDMNINLKINTNDNINNDLSLNDNINKDNINCDDINNKKNDLINTL  
SELNGTCLKSKVSHKSLKHK TAKDNNIK

Epc-N

>CelegansNP\_499642

MATTSKAFRARALDSNRSM TVYWGHEL PDLSECSVGNRAVTQMPSGMEKEEEEQEKHLQEAIAAQQASTSG  
IQLNHVIPTPKVDRVEDQRYHSTYHNKNKMHRSKYIKVHAWQALERDEPEYDYDTEDEAWLSDHTHIDPR  
VLEKIFDVTVESHSSETQIASEDSVINLHKSLEDSSIVYIEYWL SKRTSAATTSGCVGVGGLIPRVTEC  
RKDGQGVINPYVAFRRRAEKMQTRKNRKNDEDSYEKILKLVHMSKAQQLFDMTARREKQK LALIDMSE  
ILAKRMEMSDFGGSPSSFNEITEKIRAAATLEVVKPLAEINGSDEVKRRKKPRRKIADKDLISKAWLKK  
NAESWNRPPSLFGQHSNGVPTVTTKPVRESLANGRF AFKRRRCVYRAALTVYNVPTAPATVPPVQTQAA  
VASSSSSKSTDMVPSNMKFFETFVRDSQDSVSRSLGFVRRRMGRGGRVVFDRMPRNRDDNDERTSTDPWA  
EYCVADSSRTFRARNSSLGTEETDDLSPKSLYFARSNRFANDDETEREWTSRCQOSSWRDTEVDDELK  
KRETTSEKFTETTTNGSTKTHTESDDSEVERMEVDDQVDEAQITVSSSKDDGMNGNDKNEDEEDDDDDMD  
VDEHQTVVGVHQQHQQHQQKVRHQMNNGGGGGVVKLPPLQELSPPLSGNGRADRAEPTPVPKMC G  
TVSDSDDWREPSGSPSESNSSTEWGGYTPQEQAHVAVANAVAVAFKEKLMNGVDDDDDDQQSPARGARDH  
SIKEFFDVNGNTAGTEKVHDAVDNRSII

Epc-N

>SpombeCAB52878

MSVSKNARAYRQRKVGIKTVMPIYFERDIPDFDEEASLQRTVPLVESGVEKEEEEEKHLQOVINEAHEA  
IVRGSEKLIIPTRAKNIGIIDKYKKNFILPKTLIRFSLTVEECTNPEYCMDEHDTEYFLK LKQAQPS  
LSKFSELD FEIVMQTFEEEEINQNQPFLSMDTSQILPLSELITSFELKDVLYLKPLASQVYPYWRERRISK  
GGLPIMAKAQV GDDKDDDDPYVCFRRREIRQARKTRRSDAQSYDRLRRLRQSMETSLQ LLEQVYKREQK  
LQALEDDYAI FQKRCLVKKLKR TLNIKDSDELLINPKRPIEVKPAAPVPTPAPPVKTSHPASYPQPT  
RNVEVRPLMLDDVQSAQITQFQIRLQORLTKEQLDRNWVDLLETPTSTVIHTNYPDSFYRNIIPYYS GK  
ETKQSHNQLSIPSSPTSTPLSDNGPTYSTPHSSLSNFNTCDLSLFSNNSLYGYSTLLHPRNPICVRQRI  
GRGGRLMLDRTRALPVHRLSKPKSRVEDRWLFDIPFDADDTIILDDESDASIMFRASLLNDDMGTQS

Epc-N

>CbriggsaeCAE72836

MATASKAFRARAFDSNRSM TVYWGHEL PDLSECSVGNRAVTQMPSGMEKEEEMESH LQDAILAQQASTSG  
VQVNHVIPTPKVDRVGD DRYHSTYHNRNQRRDKYIKVHAWQALERDEPEYDYDTEDEEWLRDHQHIEPR  
ILEKVFDTVENHSSETTVVASEESVINFHKTLDSSIVYEVYEWVNKRLTAASTSGCVGVGGLIPRVTEC  
RKDGQGAVN PYVAFRRRAEKMQTRKNRKNDEDSYEKILKLMHMSKAQQLFDMTARREKQK LALLDVESE  
LLTKRMELSDFGATS VFGEITEKLRATSETSKPEQNGPEEVPKKKRIRKKVGDKDLLSKAWLRKNAECW  
NRPPSLFGHNGAVPTVTTKPAREGAPDGKFAFRRRRNCGYRAPIIFTPTVIQAVPATPSASSATAATKPA  
EVTPPQSSRFYETFLPVANGAMRSIGLVRRRCGRGGRVLFDRMPRINADEERLSTDPWAEYCVADNSRTFR  
ARQTS LGTEEEESDDQSPRSLYFARS DRCFNDDEREREWASRYEPTDWDKIDAEDEPSPPNVKFFNGT IAS  
TSSHSEPVKLEEKGDNDN SEVERMDVDGQEDEAQITVTSTKDEDVPEEEEEEDGDDRKNEDMDVDQEKK  
VKKPEQSNTIQVEKFRHIMTLKPLQEHSPPLHSHSGNGRAGREEPTPLPAKMSATVSETEDWREPSGSPS  
ESNSSTEWGMMPYIGQEHQTA AAVVIAYQOKKLMNVVVEEDESVDDEDQHHQETKDRDHAIKEFVDVN  
GNNAGKPRGENVHDAVDVV

Epc-N

>TnigroviridisCAF97756  
 MSKLSFRARALDASKPLPVFRCELDPLHEYASINRAVPQMPTGMEKEEESVCFHGLKLWKYAVWRYFFI  
 FKRSEASLIFSAQAFTKWPPFFPTETRRRISFSLDTEQPDYDLDSDDDMFVNKLKKKMEISQLQFEEMIDR  
 LEKSGSQQLVSLPEAKLLLLKEDDELIVFDYWSRKRKNSKANSLIPTVKQEKRDGSSTNDPYVAFRRRT  
 EKMQTRKNRKNDEASYEKMLKLRDLRAVTTILEMIKRREKSKRELLHLLTLEVFKEKRNVMADFGGEVMAE  
 VLAEQALVRPQIIPLVPLTNQYRHQDHMDHKDYKSKPDKMEVPRQKRKYEKKQKVLPLSSGAPHHQGPVV  
 FNAKDLNQYDFPSSDDEPFVAAAPTTPSPQWRVLAALTMGMSNLECLCSQLHSGSSEAEENDPDGVY  
 AFRRKAGCQYYAPRQDCVGSWPWCGGEDGLAEARFRYSLTTLTVPRRCLGMARRRVGRGGRVLLDRAHT  
 DYDNIFHGLDPEVLHPAHPSPRPLTPPPTTASRSPATDKPASTSETNTSDRRCSSLDPSLCSPTSDDL  
 HILLSIKSCRWRHFRPRTLPLHELDNAHPIFRKLSRGLKKRALASVAGGOPYKRPARAVPAPAPVVGVIK  
 GLHLASTASPSAATAPPIAAPTVPVSLHPCTTTTSPPPVPPTTALPTPPTPLSPPPPPLRSCWETTASVW  
 AFPPANACHSADAKHPRVIRLIRKAGPRRHGQLSETQGGHCPAAGHRPQGEPRARQASTEQSIREHNGHGG  
 HVASARHDASPASFFFLPFFLFLSFNFRCYASLGNCDIKWQNERSKAGLSPQQFGT

Epc-N

>DdiscoideumEAL63510  
 MSRNGNNTENTITTRSQRISFRPRPIDISKPLPIIRTAIDDESTVSRVPIIPTGMEAAEEGETHLQD  
 IIQASVKMRHDQLPEIPIPVVNVVAGYDQSSNPQFSGSTYIILYHEKTEDEWDQVCEYDADDDDEEFVQ  
 QLNQOTAMNSTNFPPTKKPILSVDKFEQIIDRFKDFYYYGQCDQLKSEQICKGLRPQFAHMIHQHWLSKR  
 KQLTNNTLIRRLKPPDREDPSPFKAFRTREIDNNKLLKARKNDAASLLKMTQLREEIEKTRIILEMICK  
 REKLKDHLLNLSVQLYNKLIELAQIRQEEDDLIPNSTSSTTSTNINNISLSSSSSSSSSHKKKHKDKSS  
 SSSSSSTVSNNNNNNNSSNSNNNNNNNNNNNNNNNNNNNNNTISNSNNSSSSLISSGHSNLQSI  
 LLNQNKTGPVFTESHGMPINPKARQEGYRHFVVKPGEFPTPSLEKQYGEHSRSEKSKPPSITSDTNTT  
 SSSTSSSSSNNEIIMIDGDNITILTEKDKQINQQQKQKQQQQLOPPQPLTKEEEIEREKRFQMDYFN  
 SISIPTSKDYQRLGDNYEDEKQASQITAGISGSSISTDSESDVESDFEYNQRIAPIPPTRPPTNGKGPV  
 IYPSLSQGYIFVNHNYPPVLGRVRLGLYGRTYIDYIPYNNDNSDDDDDDVDNNINNDNNNNKNSGN  
 NNNNRSRGKGNRSGGKSKPTSISNPSLVAPQSYQFIDVQPLQRLNHNQOPTQPNSSQIITQNIENTN  
 NNNNNNNKNNNNNDILSNIPLCSSSIITDTSNHLNLIKDKGDSNLSENLNNNNNNNNDNNNDNDKNN  
 NNNNSDSFTLAENKINNTNLDKIDSVANSTEINNTNTNTNNNNNSNSNKNDDNDNNNNIINNNTINSDN  
 DTNSEEGNNNNNNNNNNNNNNNNNNNNNNNNNNNNSNLKRFQETINTNGTNGVTNKNINVGNNGPT  
 KTAKILDFEGFEVIKNGNEESNNNNNNNNNNNNNNNNNNNNNNNNNNNNNNNNNNNNNNNNNNNNNN  
 SKKTPSKNNTTQTPPPLNPNSIEKYFTKKQVPS

Epc-N

>KlactisCAG98909  
 MPAPAVDSSRFRHRKISVKQRLRIYKSHEIKDLEQEDVSAISSQHQQRELMEIETGVEKNEEKEEHLYKI  
 LQSNQLRENKDLFIPTDASKTWDEFDRFYQGEFKCPTSYIQFSAQLEDCCGTLNMDDEEDEFIADLN  
 KSLADSVPLTEDEFELIMANFESSIKDRQPFSLMDPESILSFADLKPTMLKNDVGDGSGVKELAKEIGM  
 PEDEPFLTMFDNKRPLGKREKNMETLIELFGEKIHDKWQKISRHGCDIFPQLKSERNNDKDDNDPYVC  
 FRRRELROPRKTRRIDVQNSQKLRLLCQOLEYTKDLALTVAKRERAVLEVLENEKVFVQARAQLKTMKRK  
 LGIDADNEDLYSAKKQKLVSSVRTIKQQQLLQKQLOIQOQQQQLOQQQAAITSDSVVKRAKSSKSSK  
 LHKEDSGLYADEKGESEPKKPKTGSNKNKEQSLSSAQEIGAQSPVANVSNVQQQQQASSQVYVKLPNS  
 KIPDIVLEDVGLLHSSEKSTRKFVEDRMRKRKQEDGDIFNLTDDPYNPVFNLSIPDNVSPQDAPFSSV  
 AGSKFEVKTSYSPNLQNYITGTANDIKVFNKEGEAVENNEYKLEFFNPFDFNEIHTSREFPIAFRRRR  
 GRFNMEYIDQRKTDHNDMLLQFIDLQIQKQELDNDVINVYDSKLDLRSYHWHKYDSNYNIYGSKF  
 SDEPAKLNQISNDTQVVRFGTMLGSKAYEQLRDATIKYRQEQINKRKKLNSLQQQQMLQKGOQPINNAPH  
 SQSSPPSHQDTRKNPGSTPNQSSPPKHHVTPNAAA

Epc-N

>AgossypiiAAS53891  
 MPTPSAQLDQGISSNGGTSGVSASSTRFRHRKISVKQKLRVYKASDLKDLQDELOQRELOEIEETGVEK  
 NEEREVHLHKILQKNQLOLDLYIPTPDASRVWKEFDEMYQGRFTTPASYIQFSVQLEDCCGPAYNMDER  
 DEAYLAELNGGESEALTEDEFELMTNFESAIRERQPFPLAMDPESELLMYEDLKPTMLKNDIGDAGLKTEL







EFEIICDKLEKIIIEEKQPFLSMDPSNILSFKELSAYIIIEFNNSNKDKPYVOLGSLNLYISTTALKEKLS  
KELSFEPFVTLFDKSLLDQTSTNIVRPIPKLLELFGEVPVYEHWKYRKIERKGGKQIHPALKFEDPSANEKD  
NDNDPYICFRRREFRQARKTRRADTLGAERIRLLQKSMHRARDLVMSVCRRELIIKLENWETDHAIFKLRS  
DAKNLKRVRVGVKGDFFLYPHKRKKIIKVKEEDEDKESKIKRDKRSRFDSSREGSATSMPGSATIGTNA  
INKDRLANGQVHHTQEASSSSQPYVKLPSPKIPDMGLVTVSLVLKEKNETIKRAVLEKLRKRKEQDKDFI  
NVTDDPYQPFNFNIATNTKFKNNELKHIPYSSIAATSFHEINTTNYISEKLNKLLLEEGKKPLPGTKTFRGS  
NGELIPSKPFPHLLALIQDRIDNSQFNVSYSIAQLLSNIENNNFSAYNNGYGOOQOHOQOETNRDKTKLS  
DPIFRLRKRVRGRFNRFVDRRGLMKRPNDVIDDFLKFDDDEGVNDDCDQMDVDSSELISKNNVPNVYDSRVD  
EIKRLDSRWQFDNDLLEYDKGLQSPFSLDPSRLNCISDDTQSIIRFGSMLLSKSYDLLRDSVHQROALVQ  
QARMRTLQQQRNNKQQAAGQSSGSSASLGSNTNSNSSISGQADQGQTNLTNSGITRQGGANVNGSQTS  
TTNNTRSSVSGSMNPKLPTQSLQRSNTNSPLLASQPQGYSQQKFNKIPPTSQSQSQSPTHAAGQLQTS  
KMYNKHGSNITPSNLKGPKFTPANNNQIGGSLPNRK

Epc-N

>P. vivax CAB96695

MAGDHQDPGYISYKDYVNAKHEFKRTMNNRYPDNERFEKIIINKINNESHKWNLKKNKFTTTLHNVLANDLA  
FYGGMKHHYCRFINYWLKNEVQINNNHFDKSYFPIFQKFSDEFSSIIKTNKNDQRCNNYIFNLSHKTINIM  
DILYGLYDEYDKIKSHREDSNYGSCDTFLSWASNHNHYAIDKYYENTNLYQKFEEIKKLIDNLKESSSSSC  
IKSIYHLKPQVVKLREEEEARREAAEKQKRALEEAI REREEAEKROHEQELKAEKELLORQANNTVGDTA  
SGEGTFQHTDDRSDLRAPIISELDQNAQRFGYPERSESSRGLLLDNGHTREGQFIYTNEDTRQOGEGVYE  
QPGTDKTRSGMFGSSGFPRYITEVFGSVDPPVVGVS GGMGALFLLFRYTPLGTFFRGGGRGRAHRIPRS  
FNGQFLGAFPDINEYNGGYIGYGPMDIPYGAE

Epc-N

## Epc-N SUBFAMILY III

>PtroglyodytesXP\_525628  
 MLGKSCNCGLWAGPLLLGERCCGLRSLLVWSEGLVCGGRDAGAQEGSSGCLSACYCCSLPGPGDSLRLPG  
 CVVLDTLERGNHYQMRRKGRCHRGSAAARHPSSPCSVKHSPTRETLTYAQAQRMVEIEIEGR LHRISIFDP  
 LEIILEDLTAQEMSECNSNKENSERPPVCLRTKRHKNNRVKKKNEALPSAHGTPASASALPEPKVRIVE  
 YSPPSAPRRPPVYYKFIKSAEELDNEVEYDMDEEDYAWLEIVNEKRKGDVPAVSQSMFEFLMDRFEKE  
 SHCENQKQGEQOQLIDEDAVCCICMDGECQNSNVILFCDMCNLAVHQECYGVPIIEGQWLCRHCLQSR  
 RPADCVLCPNKGGAFFKKTDDDRWGHVVCALWIPEVGFANTVFIIEPIDGVRNIPPARWKLTCYLCKQKGVG  
 ACIQCHKANCYTAHFVTCQAQKAGLYMKMEPVKELTGGGTTFSVRKTAYCDVHTPPGCTRRPLNIYGDVEM  
 KNGVCRKESVKTVRSTSKVRKKAKKAKKAVAEPICAVLPTVMVLACEVLGASVYSGRHLVSRMVLACEVL  
 GASVYSGRHLVSRMVLACEVLGVSVYSGRHLVSRMVLACEVLGASVYSGQYLVSRLVCEVLAGEVTR  
 SSPAQPAEEPCGAVIRAQRPSAPADALSSLWLPVSGCPWRAVLRGQAFGVLSMOTALGVVGRIVLALNR  
 IANQVAIQKKQFVERAHSYWLLKRLSRNGAPLLRRLQSLSQSRSSQPPGLPERTARFGLLRGRVRK  
 WLSGGKLGLEALVSAPAMLGKGREWRHWSRPPRCWGKEESGGIGLGPCDVGEWKRGFGRKLRVQILGL  
 ISGLDRTPDKPQRSCEGQIPWKVGMVAKQGTSSCGNHFFDSHKLGHGQNPCSSRTRGPVGRGHGDPGS  
 WGWPGAWWSQAREGGQLQRRGDPLEPASWAPSASSLPVRPHVLLCAEYVCKERTFPQPGQSSSSGRGGSF  
 AKTPGKEQKELPGLPEQQSSRRGEPGNLPLCERAVGRDCASAFSWPGMATAWPQGEQGRQLSFIKGEQRF  
 VCMLVASHCVSCSRGPPFLSWERILQLSQCLSCGMLGAAHIVLAVLRVWPLPVPRTCWRHWAQWQELGA  
 VARRPGVGHSGSDFLLITLVWMLAGLRLAACAVWRTLLSTEKGAGAVNGTAVGKRVSGWRRACAGQGS  
 SRSLHSQLSWRVLEGGPFPCGPAFVGLSGSVKAPPPACGGCLPLWRVEPVHRGQPPAHLGLAVPSVPS  
 IPSVSSVVPVLRVSWGLVRRRENDEEMKAAEKLKYVQLRHDLERARLLIELLRKREKLKREQVGLGLS  
 RVECTTGHGAVVLRWQQLLQRVKVEQVAMELRLTPLTVLLRSVLDQLQDKDPARIFAQPVSLKEVGVGAR  
 LSCRMDCDGFVLPFDRETCDWLEYIPCVPDYLDHIKHPMDFATMRKRLEAQGYKNLHEFEEDFDLIIDNC  
 MKYNARDTVFYRAAVRLRDQGGVLRQARREVDSIGLEEASGMHLPERPAAAPRRPFSWEDVDRLLDPAN  
 RAHLGLEEQRLRELLDMLDLTCAMKSSGSRKRAKLLKKEIALLRNKLSQLSQQHSQPPPTGPGLEGFEEDGAA  
 LGPEAGEEVDLDTLRLHEADSRVRPSCHNIGSWFAFLFPCTSKSEQOTVEIRHRIVVQFSFKTKTFIS  
 YGRQLWALEVHVWRSPCRARALSTWSTVALRKGMRVPRGDKSPPKLEPSDALPLPSNSETNSEPTLKP  
 VELNPEQSKLFRVTFDNESHSACTQSALVSGRPPEPTRASSGDVPAASAVAEPASDVNRRTSVLFCCK  
 SKSSFRGWRLFCSQGKGRGAHAETPRWRRSPQESAWTQPPLVKDSLQVQAPRKFCDSESGQAVHWVLEV  
 GSVQLWASPLHAELGVRLLTHFLGVSRLSAAEVAPPDRALPQLWAPTVDVDFAGWRPRPQQPLRLVHQMSL  
 VEEHVSPPGHCLTLEWSVLQASRGDSGVEQSYCRPSVSVAHGFCSCDGPAPESGPDWLPSSATARSAPV  
 NRHLKRPSTRHRFGDPCCKSLCARAGACESVGVSLSTRRRCGDPCRESPCARAGACIVTERVPARWALGL  
 SLTVPSGIVTEQVLSRHLVWALGLSLTIPAALSRSQSDGDPWVEKCTKTALLFTMVKVKLKTGDSGLSF  
 ATAWGPGQSGFQAGSAPHLHTAKLRMSRRSRGSLGAGGRGLVSRVGLCSHGSMPSGVSAAATDQGLV  
 FLHLWPGGFVVSTWVEGWPEPTRGDYGPSVRPAGLRLPRWALGLLFPVGRGGVSAAVAFSLSEADPLGTSR  
 DSCRCVDDDLPCVLI PFLAPLHAVVHTELGPSWLLSGLCMAWLCWRHSCGCSRARALRLAPLGLSVKAA  
 LVIVFPQVAIARPTSLTNGFGGARSEQEPGGGLGRKATPRRRCASESSISSNSPLCDSRFTSSRPAHPQ  
 ACLAVGVSGRMRGQLGGGQLTGRSLSEAEGRGAPDLSRSSRFSNAPKCGRGKPALVRRHTLEDRSELI  
 SCIENGNKYAKAARIAAAAGTDCRVGALNFRPLGEGEAPGFVQAQPSLWKAAMLRRGGIRTEIPQIIDPKM  
 PRVPGHHNGVTIPAPPLDVLKIGEHMQTKSDEKFLVLFVDNKRWSQWLPKSKMVPLGIDETIDKLMME  
 GRNSSIRKAVRIAFDRAMNHLRSRVHGEPTSDLSID

Canonical Epc-N  
 PHD 6.3e-10  
 Bromodomain 1.5e-17  
 PWWP 0.0002

>CfamiliarisXP\_538319  
 MGLLSVVLAWPRGPPVVRHGSQYQMRRKGRCHRGAARHPSSPCSTKHSPTRETLTYAQAQRMVEIEIEGR  
 LHRISIFDPLEIILEDLTAQELSECNSNKENSERPPVCLRTKRHKNNRVKKKHEALPSAHGPLASASAL  
 PEPKVRIVEYSPPSAPRRPPVYYKFIKSAEELDNEVEYDMDEEDYAWLEIVNEKRKGDVSAVSQSVFE  
 FLMDRFEKESYCNQKQGEQOQLIDEDAVCCICMDGECQNSNVILFCDMCNLAVHQECYGVPIIEGQWLC  
 CRHCLQSRARPADCVLCPNKGGAFFKKTDDDRWGHVVCALWIPEVGFANTVFIIEPIDGVRNIPPARWKLTC  
 YLCKQKGVGACIQCHKANCYTAHFVTCQAQKAGLYMKMEPVKELTGGATTFSVRKTAYCDVHTPPGCTRRP  
 LNIYGEVEMKNGVCRKDSVKA VRSTSKVRKKAKKAKKTLSEPCALPPVCAPYIPQRLNRIANQVAIQ  
 RKKQFVERAHSYWLLKRLSRNGAPLLRRLQSLSQSRSTQORENDEEIQAAKEKLYWQLRHDLERARL  
 LIELLRKREKLKREQRAVVSVPTECRIWQVKVEQMALELRLTPLTVLLRSVLDQLQEKDPARIFAQPVSL  
 KEVSVHPLGTGLPGGLGNNCMKYNAKDTVIFYRAAVRLRDQGGVLRQARRQADSIGFEEASGMHLPERPA  
 AAPRRPFSWDDVDRLLNPNANRAHMLVEEQRLRELLDKDLTLCAMKSSGSRKRAKLLKKEIAVLRNKLSQL

HSQPPPAESGIGSFEEEGAQLGQETGEEPTLASSGDAPAAAASAVAEPASDLGKTFLSVVLPRLLETL  
QPRKRSRSTCGDSEVEEGSPGKRLDTARGGSAQVLDGCPLPLPELAAAGRDASSARPDPVGARPKLHPGG  
APGIPLAGLTNGFGGARSEQELGGTPGRRAPRRRCASESSISSSSSPLCDSSFSAPKCGRGKPALVRRH  
TLEDRSELISCIENGYAKAARIAAEVQNSMWISTDAAASVLEPLKVVWAKCSGYPSYPALVSREHLLR  
DMHAGVRMLGKLLRKPPQIIDPKMPRVPGHHNGVTIPAPPLDVLKIGEHOQTKADEKFLVLFVFDNKRWS  
QWLPKSKMVPLGMDETIDKLKMMMEGRNSSIRKAVRVAFDRAMSHLSRVHGEPSDDLSDID

Canonical Epc-N

PHD 6.3e-10

Bromodomain 0.00015

PWWP 5e-15

>CfamiliarisXP\_541782 (misannotation?)

MSLSGASERSVPATKIEITVSCRNLLDLDTFSKSDPMVVLYTQSRASQEWREFGRTEVIDNTLNPDFVRK  
FVLDYFFFEKQNLRFVDVYNVDSKTNISKPDFLQAFALALGEVIGGQSRVERPLTGVPGKCGTILLTAE  
ELSNCRDIATMQLCANKLDKKDFGKSDPFLVFYRSNEDGFTTICHKTEVVKNTLNPVWQPFSSIPVRALC  
NGDYDRVTVIDVDWRDGRSHDFIGFETTSYRELSKAQNQFTVYEVLNPRKKCKKKKYVNSGTVTLLSFS  
VDSEFTFVDYIKGGTQLNFTVAIDFTASNGNPLQPTSLHYMSPYQLSAYAMALKAVGEEIQDYDSDKLP  
AYGFGAKLPPEGRISHQFPLNNNDEDPNCAGIDGVLESYFQSLRTVQLYGPTYFAPVINQVARAAKISD  
GSQYVLLIITDGVISDMTQTKAIVSASSLPMSIIIVGVGPAMFEAMEELDGDVVRVSSRGRYAERDID  
QLFSLGLPTLQMSPPILRKLRPVEWFLLRQTRPTPTQNSEPFLRLQASLWLLALHPVPPRGSSPASPP  
FSETKSGPTAAARPAEGSADWPQTARLLRMPNTRFSLQKLSKMEVLERPCGVPRGSSEFQRMASRGSAA  
GRGSVAKVQLDSAEAPMSGPEARPPSGFRNGRRPTEL RHQAGGTGSGRGQRGNPGEPAERGAAGSRGG  
EFEFWFPPPLVPLPPSPSGTSAGGSVLLWEPGRQSRRAHQGPIIEREELACSSDWFVFKDTAAGLEKLGQY  
LTKLGFGLGAGAI CCHYSRNTGEEEEGKALRTVVELNVPRLCDSMGVDFDVKTFCHNL RATKPPYECPVE  
TCRKVYKSYSGIEYHLYHYDHDNPPPPQOTPLRKHKKKGRQSRPANKQSPSPSEVSQSPGREVMSYAAQAO  
RMVEVDLHGRVHRISIFDNLDVVSDEEEAPEEAPENGSNKENTETPAATPKSGKHKNKEKRKDSNHHHHH  
NASVSTTPKLEPVYRELEQDTPDAPPRPTSYRYIEKSAEELDEEVEYDMDEEDYIWL DIMNERRKTEG  
VSPIQEIFEYLMRLEKESYFESHNKGDPNALVDEDAVCCICNDGECQNSNVILFCDMCNLAVHQECY  
VPYIPEGQWLCRRCLQSPSRAVDCALCPNKGGAFFKQTDGDRWAHVVCALWIPEVCFANTVFLEPIDIEH  
IPPARWKLTCYICKQRGSGACIQCHKANCYTAHFVTCQAQAGLYMKMEPVRETGANGTSFSVRKTAYCDI  
HTPPGSARRLPALSHSEGEDEDEEEDGKSWSEKVKKAKAKSRIKMKKARKILA EKRAAAPVSVPCI  
PPHRLSKITNRLTIQRKRSQFMQRLHSYWTLRQSRNGVPLLRRLQTHLQSQRSQDQVGRDSEDKNVALKE  
QLKSWQRLRHLERARLLVELIRKREKLKRETIKVQOIAMEMQLTPFLILLRKTLEQLQEKDTGNIFSEP  
VPLSEVTELDEVPDYLDHIKKPMDFFTMKQNL EAYRYLNFDDFEEDFNLI VSNCLKYNAKDTIFYRAAVR  
LREQGAVLRQARRQAEKMGIDFETGMH IPHSLAGDEAPQHTEDAAEEERLVLENQKHLPVVEQLKLLL  
ERLDEVNASKQSVGRSRRAKMIKKEMTALRRKLAHQRETGRDGPDRHGPTSRSSLTPHPAACDKDQOTDS  
AAEESSSQETS KGLGNMSSTPAHEVGRRTSVLFSKKNPKTAGPPKRPGRPPKNRESQMTPSHGGSPVGP  
PQLPIMGSLRQRKGRSPRPSSSDSDSDKSTEDPPMDLPANGFSGGNQPVKKSFLVYRNDCSLPRSSSD  
SESSSSSSSSAASDRTSTTPSKQGRGKPSFSRGTFFPEDSSEDTSGTENEAYSVGTGRGVGHSSKYPHPRP  
GMLGAQCQGLASPLAADPPPLSHSCEVVRKSLGRGAGWLSEDEDSPLDALDLVWAKCRGYPSYPALI IDP  
KMPREGMFHHGVPIPVPPLEVLKLGEOQTQEAAREHLYLVLFVFDNKRWTQWLPRTKLVPLGVNQDL DKEKM  
LEGRKSNIRKSVQIAYHRALQHRKSVQGEQSSSETSDSD

C2 1.1e-11

C2 8e-18

Copine 8.5e-93

Canonical Epc-N

PHD 5.4e-12

Bromodomain 9.3e-31

AT hooks

PWWP 4.6e-40

>HsapiensAAH47508

MRRKGRCHRGSAAHRPSSPCSVKHSPTRETLTYAQAGMVEIEIEGRLHRISIFDPLEIILEDLTAQEM  
SECNSNKENSERPPVCLRTKRHKNNRVKKNKNEALPSAHGTPASASALPEPKVRIVEYSPPSAPRRPPVY  
KFIKSAEELDNEVEYDMDEEDYAWLEIVNEKRRKGDVPAVVSQSMFEFLMDRFEKESHENQKQGEQOQL  
IDEDAVCCICMDGECQNSNVILFCDMCNLAVHQECYGVPIYIPEGQWLCRHLQSRARPADCVLCHNKGG

FKKTDDDRWGHVVCALWIPEVGFANTVFIETPIDGVRNIPPARWKLTCYLCKQKQGVGACIQCHKANCYTA  
HVTCAQKAGLYMKMEPVKELTGGGTTFSVRKTAYCDVHTPPGCTRRPLNIYGDVEMKNGVCRKESVKT  
RSTSKVRKKAKKAKKALAEPICAVLPTVCAPYIPQRLNRIANQVAIQRKKQFVERAHSYWLLKRLSRNGA  
PLLRLQSSLSQSRSSQORENDEEMKAAKEKLYWQRLRHDLERARLLIELLRKREKLKREQVKVEQVAM  
ELRLTPLTVLLRSVLDQLQDKDPARIFAQPVSLKEVPDYLDHIKHPMDFATMRKRLEAQGYKNLHFEED  
FDLIIDNCMKYNARDTVFYRAAVRLRDQGGVVLROARREVDSIGLEEASGMHLPERPAAAPRRPFSWEDV  
DRLLDPANRAHLGLEEQRLRELLDMLDLTCAMKSSGSRKRAKLLKKEIALLRNKLSSQHSQPLPTGPGLE  
GFEEDGAALGPEAGEEGDKSPPKLEPSDALPLPSNSETNSEPPTLKPVELNPEQSKLFRVTFDNESHSA  
CTQSALVSGRPPETRASSGDVPAASAVAEPASDVNRRTSVLFCCKSKSVPPKSAKNTTETQPTSPQLG  
TKTFLSVVLPRLETLQPRKRSRSTCGDSEVEEESPGKRLDAGLTNGFGGARSEQEPGGGLGRKATPRRR  
CASESSISSNSPLCDSFNAKCGRGPALVRRHTLEDRSELISCIENGYAKAARIAAEVQSSMWIS  
TDAASVLEPLKVVWAKCSGYPSYPALIIDPKMPRVPGHHNGVTIPAPPLDVLKIGEHMOTKSDEKLFLV  
LFFDNKRSWQWLPKSKMVLGIDETIDKLMMEGRNSSIRKAVRIAFDRAMNHLRSVHGEPDLSLSDID

Canonical Epc-N

PHD 6.3e-10

Bromodomain 5.4e-32

PWWP 1.1e-19

>MmusculusXP\_128275

MFGGGSGGSALSAGGEAGESGRRGPEAVRPGGRSRRDREGRAVRRREPARGTPEIVERGLVSPEQAR  
SSATTPWMSAGNAEKRARVRGFLGPLGEKQLSCALNLQKTQLLMVPCSCNHCQMRKGRCHRGSAAHRPS  
SPCSIKHSPTRETLTYAQAQRMVEIEIEGRLHRISIFDPLEIILEDDLTAQEMSECNSNKENSERPPVCL  
RTKRHKNNRVKKNVLEPSTHGTASASALPEPKVRIVEYSPPSAPRRPPVYYKFIKSAEELDNEVEYD  
MDEEDYAWLEIINEKRKGDVSAVSQNMFEFLMDRFEKESYCNQKQGEQQLIDEDAVCCICMDGECQN  
SNVILFCDMCNLAVHQECYGVPIPEGQWLCRCLQSRARPADCVLCPNKGGAFKKTDDDRWGHVVCALW  
IPEVGFANTVFIETPIDGVRNIPPARWKLTCYLCKQKQGVGACIQCHKANCYTAHVTCAQKAGLYMKMEPV  
KELTGGSATFSVRKTAYCDVHTPPGCTRRPLNIYGDVEMKNGVCRKESVKTVRSTSKVRKKAKKAKKTL  
AEPCAVLPTVCAPYIPQRLNRIANQVAIQRKKQFVERAHSYWLLKRLSRNGAPLLRLQSSLSQSRNTQ  
QRENDEEMKAAKEKLYWQRLRHDLERARLLIELLRKREKLKREQVKVEQMAMELRLTPLTVLLRSVLEQ  
LQEKDPAKIFAQPVSLKEVPDYLDHIKHPMDFATMRKRLEAQGYKNLHAFEEEDFNLIVDNCMKYNAKDTV  
FYRAAVRLRDQGGVVLROARREVESIGLEEASGMHLPERPIAAPRRPFSWEEVDRLDPANRAHMSLEEQ  
LRELLDKLDTCSMKSSGSRKRAKLLKKEIALLRNKLSSQHSQAPPTGAGTGGFEDEAAPLAPDAAEEG  
ANSPPKLEPSDALPLPSNSETNSEPPTLNPVELNPEQSKLFRVTFDNESHSTCTQSALVSGHPPEPTLA  
SSGDVPAASAVAEPSSDVNRRTSVLFCCKSKSVPPKSAKNTTETQPTSPQLGTTKFLSVVLPRLETLQ  
PRKRSRSTCGDSEVEEESPGKRLDTGLTNGFGGARSEQEPGGGPRKAAPRRRCASESSICSSNSPLCDS  
SFSTPKCGRGPALVRRHTLEDRSELISCIENGYAKAARIAAEVQSSNMWISTDAASVLEPLKVVWAK  
CSGYPSYPALIIDPKMPRVPGHHNGVTIPAPPLDVLKIGEHMOTKSEKFLVLVFFDNKRSWQWLPKSKM  
VPLGVDETIDKLMMEGRNSSIRKAVRIAFDRAMNHLRSVHGEPASDLSLSDID

Canonical Epc-N

PHD 6.3e-10

Bromodomain 2.2e-32

PWWP 1e-19

>PtroglyodytesXP\_516261

MSPDSRWPASWGNVSVFGAARASGRRGALFHLLHFHKGETPPHPESGLRALPGPSPIPPAPAPYFLQPPE  
LQGQMPPFSLGPPHGLSGLSSRLPRLCCLCRVPRGDCRFVLLWEPFTRDPAWKEESLFLVLRCDMSGVD  
FDVKTFCNLRATKPPYECVETCRKVYKSYSGIEYHLYHYDHDNPPPPQOTPLRKHKKKGRQSRPANKQ  
SPSPSEVSQSPGREVMSYAQAQRMVEVDLHGRVHRISIFDNLDVVSEDEEAPEEAPENGSNKENTETPAA  
TPKSGKHKNKEKRKDSNHHHHHNSASTTPKLEPVYRELEQDTPDAPPRPTSYRYRIEKSAEELDEEVE  
YDMDEEDYIWLDMNDRRKTGVSPIPQEIFEYLMRLEKESYFESHNKGDPNALVDEDVCCICNDGEC  
QNSNVILFCDMCNLAVHQECYGVPIPEGQWLCRCLQSPSRAVDCALCPNKGGAFKQTDDGRWAHVCA  
LWIPEVCFANTVFIETPIDGVRNIPPARWKLTCYICKQKQGVGACIQCHKANCYTAHVTCAQKAGLYMKME  
PVRETGANGTSFSVRKTAYCDIHTPPGSARRLPALSHSEGEDEDEEEDGKGSSEKVKKAKAKSRIKM  
KKARKILAEKRAAAPVSVPCIPPHRLSKITNRLTIQRKSQFMQRLHSYWTLLKRSRNGVPLLRLLQTHL  
QSQRNCDQVGRDSEDKNWALKEQLKSWQRLRHDLERARLLVELIRKREKLKRETFCKWQNVGTGAYEQNPQ  
LCDIGWERRRKHLPVEEQKLKLLERLDEVNASKQSVGSRRAKMIKKEMTALRRKLAHQRETGRDGPERRH

GPSSRGLTPHPAACDKDGQTDSSAAEESSSQETSKGLGPNMSSTPAHEVGRRTSVLFSKKNPKTAGPPKR  
PGRPPKNRESQMTPSHGGSPVGPQLPIMSSLRQRKGRSPRPSSSSSDSDSDKSTEDPPMDLPANGFSGG  
NQPVKKSFLVYRNDICSLPRSSDSESSSSSSSSAASDRTSTTPSKQGRGKPSFSRGTFFPEDSSEDTSGET  
NEAYSVGTGRGVGHSSKFPKPRPGMLGTQCQGLASPPAADPPPLPHSCEVVRKSLGRGAGWLSEDEDSPL  
DALDLVWAKCRGYPSYPALIIDPKMPREGMFHHGVPIPVPPLEVLKLGEOQTQEAAREHLYLVLFFDNKRT  
WQWLPRTKLVPLGVNQDLDEKEMLEGRKSNIRKSVQIAYHRALQHRKSVQGEQSSSETSDD

Canonical Epc-N

PHD 5.4e-12

AT hooks

PWWP 4.6e-40

>GgallusXP\_415977

MLAAVSSCFARDQPSGWCLIGKNELEDTDAACTEFPEISDASSLDLDGLSTTLTSALLLPFTVCCRLN  
TPALRRSGAASASPSPRIANPSPEAQRCRFPDRDAGTRSNWFEEEEERNWDKNCERNLIRSVRCWKH  
YQMRKGRCHRVTTRHSSSPCSIKHSPTRETLTYAQARMVEIEIEGRLHRISIFDPLEIILEDLTAQ  
EMSECNSNKENSERPPVCLRSKRHNKVKKKNEALPSSHGVPATTAPLPEPKVRIVEYSPPSAPRRPPV  
YYKFIKSAEELDNEVEYDMDEEDYAWLEIINEKRKSDGVSQNMFFLMDRFEKESYCNQKQGDHQ  
SLIDEDAVCCICMDGECQNSNVILFCDMCNLAVHQECYGVPIIEGQWLCRHLQSRSPVDCVLCPNKG  
GAFKKTDDDRWGHVVCALWIPEVGFANTVFIEPIDGVNIPPARWKLTCYLCKQKGVGACIQCHKANCYT  
AFHVTCAQKAGLYMKMEPVKELTGSSTTFVSKKTAYCDVHTPPGCIRRPLNIYGEAEIKNGVCRKEGSVR  
TARSTSKVRKTKKAKKTVVEPCTVMPTVSAPYIPQRLNKKIMNQVAIQRKKQFVERVHSYWLLKRLSRN  
GVPLLRRLQSSLSQQRNTQOREDEEMQALKEKLYWQRLRHDLERARLLIELIRKREKLKREQVKIEQV  
AMELQLTPTFVLLRSVLDQLQEKDSARIFAQPVNLKEVPDYLDHIKHPMDFSTMKRKRLDAQYKLNSEFE  
EDFNLIIDNCMKYNAKDTIFYRAAVRLRDQGGVLRQARRDAEGIGYDNETGMHLPERPKLESPQPFWE  
DVRLLNPNANRVHMSLEEQLRELLEKLDLTCAMKSSGSRKRAKLLKKEISSIRNKLSQOHNQAPQIESG  
IGSFEEESAALDQDGEDEGDKSPPKLEPSDALPLPSNLETNSEPPTLKPVELNPEQSKLYKRVKFDNELY  
STCIQKEINGHTPEHLLDSNLNESTVSAVAESSTDVNRRTSILFCKSKSISPOKSAKNTETQPTSPQLGT  
KTFLSVVLPRLTLLHPRKRSRSACGDSEVDDDESPVKRLDTGLSNGFGDGSKERALDDAAGRKVEPRRC  
ASESSISSNSLLCNTSFLPKCGKGPALIRRHTLEDRSELISCIENGYAKAARIAAEVGHSSMWIST  
DAATSVLEPLKVVWAKCSGYPSYPALIIDPKMPRVAGHHNGVTIPVPPLDVLKIGEQMOTKSDEKFLVLV  
FFDNKRSWQWLPKSKMVPLGIDETIDKLMMEGRNSSIRKAVRIAFDRAMNHLRSRVHGEVPSVDFSDID

Canonical Epc-N

PHD 6.3e-10

Bromodomain 2.1e-34

PWWP 5.8e-20

>XlaevisAAH73421

MRRKGRWHRVPAPRSSTSPCSIKHSPTRETLTYAQARMVEIEIEGRLHRISIFDPLEIVSEDDLTAQEI  
SECNSNKENSEQPPQICLRSKRHKASKEKKKSEVLPAAHGHTTTSVLPEPKVRVIECSPPSAPHRSPSY  
KFQDKSSEELDKEVEYDMDEEDYAWLEIINEKRKSEGCASVSQDIFEFMDRFEKESYCNQKQGDQOQL  
IDEDAVCCICMDGECQNSNVILFCDMCNLAVHQECYGVPIIEGQWLCRHLQSRNIPIDCVLCPNKGGGA  
FKKTDDDRWGHVVCALWIPEVGFANTAFIEPIDGVNIPPARWKLTCYLCKQKGVGACIQCHKANCYTA  
HVTCAQKAGLYMKMEPVKEVTGSTTFVSKKTAYCDAHMPPGCVRRLNIYEEPEKNGICRKSSEKNIR  
STSKARRKAKKAKQDLNETCNVLPVTVTPDIPQRVNKIVNQVSI PRKKQFIERVHSYWMLKRLSRNGIP  
LLRRLQSSLSQQRNVQESDDDEEVQALKKKLYLQRLRHDLERARLLIELIRKREKLKREQVKVEQVAME  
LKLTPLTVLLRSLLLEQLQEKDPAIFAHVNLSEVPDYLDHIKHPMDFSTMKRLEDQRYRNLFEEEDF  
NLIENCMKYNAKDTIFYRAAVRLRDHGGVLLRQARREAYVIGFDEETGMHLPEQPKIEPPQFQSWEDVD  
KLLNPNNRAHMALEEQLKELLEKLDLTFAMKSSGSRKRLKLLKREIANVRQMLSQOHVQPPQIESGIGS  
FEEDGSILNDGEEVLPRLTLLQPRKRSRSTCGSDVDGESPVKRVDTGLSNGYGEGDKEKEFTITPGR  
KLEPRRRCASESSISSNNSILCNSSFGLPKCGKGPALIRRHTIEDRSELISCIENGYARAARIAAEV  
ETNMWVAASTAAFLVLEPLKVVWAKCSGYPSYPALIIDPKMPRVGCHHNGVAIPVPPMDVLKTGDQMOTRAE  
EKLFLVLFFDNKRSWQWLPKSKMVPLGVDDETIDKLMMEGRNSSIRKAVRVAYDRALNHLNRVQGESVSD  
FSDID

Canonical Epc-N

PHD 6.3e-10



Bromodomain 3.8e-35  
PWWP 1.4e-21

>MmusculusNP\_084454  
MGVDFDVKTFCHNLRATKPPYECPVETCRKVYKSYSGIEYHLYHYDHDSPPPPQOTPLRKHKKKGRQSRP  
ANKQSPSPSEVVSQSPGREVMSYAQAQRMVEVDLHGRVHRISIFDNLDVVSEDEEAPEEAPENGSNKENTE  
TPAATPKSGKHKHKEKRKDSNHHHHSAPASAAPKLPVVYRELEQDTPDAPPRPT**SYRYRIEKSAEELDE**  
**EVEYDMDEEDYIWLDDIMNERRKTEGVSPIPQEIFEYLMDRLEKESYFESHNKGDPNALVDEDAVCCICND**  
**GECQNSNVILFCDMCNLAVHQECYGVPIPEGQWLCRRCLQSPSRAVDCALCPNKGGAQKQTDGGRWAHV**  
**VCALWIPEVCFANTVFLEPIDSEIHIPPARWKLTCYICKQRGSGACIQCHKANCYTAFHVTCAQQAGLYM**  
**KMEPVRETGANGTSFSVRKTAYCDIHTPPGSARRLPALSHSEGEDEEEDDEGKSWSSSEKVKKAKAKSR**  
IKMKKARKILAEKRAAAPVVSVPICIP**PHRLSKITNRLTIQRKSQFMQRLHSYWTLLKRQSRNGVPLLRRLQ**  
**THLQSORNCEQVGRDSDDKNWALKEQLKSWQLRHLERARLLVELIRKREKLKRETIKIQQIAMEMQLT**  
**PFLILLRKTLEQLQEKDTGNIFSEPVPLSEVPDYLDHIKHPMDFFTMKQNLAEAYRYLNFDDFEEDFNLIIV**  
**SNCLKYNADKTIIFYRAAVRLREQGAVLRQARRQAEMGIDFETGMHIPHNLGDEVSHHTEDVEEERLV**  
LLENQKHLPEVEQLKLLLERLDEVNASKQSVGRSRRAKMIKKEMTALRRKLAHQRETGRDGERHGPSGR  
GNLTPHPAACDKDQTDSSAAEESSESQETSGLGPNMSSTPAHEVGRRTSVLFSKKNPKTAGPP**KRPGRP**  
**KNRES**QMTPSHGGSPVGGPQLPIMGSLRQRKRGRSPRPSSSSDSDSKSTEDPPMDLPANGFSSGNQPVK  
KSFLVYRNDCNLPRSSSDSESSSSSSSSAASDRSTSTPSKQGRGKPSFSRGTTFPEDSSEDTSGTENEAYS  
VGTGRGVGHSSKYPHPKSGVLGTQFQGLASPPAADPPPLSRSCVVRKSLGRGAGWLEDEDS**PLDALDL**  
**VWAKCRGYPSYPALI**IDPKMPREGMFHHGVPIVPPPLEVLKLGEOQTQEAAREHLYLVLFDFDNKRTWQWLP  
RTKLVPLGVNQDLKKEKMLEGRKSNIRKSVQIAYHRALQHRKSVQGEQSSSETS

Canonical Epc-N  
PHD 5.4e-12  
Bromodomain 3.9e-35  
AT hook  
PWWP 4.6e-40

>RnorvegicusXP\_235552  
MRRKGRCHRGSAAHRPSSPCSIKHSPTRETLTYAQAQRMVEIEIEGRLHRISIFDPLEIILEDLTAQEM  
SECNSNKENSERPPVCLRTKRHKNNRVKKNNEVLPSTHGTPASASALPEPKVRIVEYSPPSAPRRPP**VYY**  
**KFIEKSAEELDNEVEYDMDEEDYAWLEIINEKRRKGDVSAVSNMFELMDRFEKESYCNQKQGEHQS**  
IDEDAVCCICMDGECQNSNVILFCDMCNLAVHQECYGVPIPEGQWLCRHCLQSRARPADCVLCNKGGA  
**FKKTD**DRWGHVVCALWIPEVGFANTVFIEPIDGVRNIPPARWKLTCYLCKQKGVGACIQCHKANCYTAF  
**HVTCAQKAGLYMKMEPVKELTGGSTTFSVRKTAYCDVHTPPGCTRRPLNIYGDVEMKNGVCRKESVKT**  
RSTSKVRKKAKKAKKALAEPCAVLPTVCAPYIP**PQRLNRIANQVAIQRKKQFVERAHSYWLLKRLSRNGA**  
**PLLRRLQS**SLSQSRNTQORENDEEMKAAKEKLYWQLRHLERARLLIELLRKREKLKREOVKVEQMAM  
ELRLTPTLVLLRSVLEQLQEKDPAKIFAQPVSLKEVPDYLDHIKHPMDFATMRKRLEAQGYKNLHAF**FEED**  
**FNLI**VDNCKMYNAKDTVIFYRAAVRLRDQGGVLRQARREVDSIGLEEASGMHLPERPIAAPRRPFSWEEV  
DRLLDPANRAHMSLEEQRLRELLDKLDLTCMKSSGSRKRAKLLKKEIALLRNKLSSQHSQTPSIGAGTG  
GFEDDAAPLAPDTGEEVLPRLLETLLQPRKRSRSTCGDSEVEEESPGKRLDTGLTNGFGGTRSEQEPGSGP  
GRKAAPRRRCASESSICSSNSPLCDSSFSSTPKCGRGKPALVRRHTLEDRSELISCIENGYAKAARIAAE  
VGQNSMWISTDAAASVLEPLKVVWAKCSGYPSYPALI**IDPKMPRVPGHHNGVTIPAPPLDVLKIGEHMQT**  
**KSEKLFVLVLFDFDNKRSWQWLPKSKMVPLGVDETIDKLKMMEGRNS**SIRKAVRIAFDRAMNHLRSRVHGEP  
ASDLSDID

Canonical Epc-N  
PHD 6.3e-10  
Bromodomain 2.2e-32  
PWWP 1e-19

>HsapiensAAF19605  
MGVDFDVKTFCHNLRATKPPYECPVETCRKVYKSYSGIEYHLYHYDHDNPPPPQOTPLRKHKKKGRQSRP  
ANKQSPSPSEVVSQSPGREVMSYAQAQRMVEVDLHGRVHRISIFDNLDVVSEDEEAPEEAPENGSNKENTE  
TPAATPKSGKHKHKEKRKDSNHHHHHNSASTTPKLPVVYRELEQDTPDAPPRPT**SYRYRIEKSAEELD**  
**EEVEYDMDEEDYIWLDDIMNERRKTEGVSPIPQEIFEYLMDRLEKESYFESHNKGDPNALVDEDAVCCICN**  
**DGECQNSNVILFCDMCNLAVHQECYGVPIPEGQWLCRRCLQSPSRAVDCALCPNKGGAQKQTDGGRWAH**

VVCALWIPEVCFANTVFLEPIDSIDIEHIPPARWKLTCYICKQORGSGACIQCHKANCYTAHFVTCQQAGLY  
MKMEPVRETGANGTSFSVRKTAYCDIHTPPGSARRLPALSHSEGEDEDEDEDEDEGKGSSEKVKKAKAKS  
RIKMKKARKILAEKRAAAPVVSVCIPPHRLSKITNRLTIQRKSQFMQRLHSYWTLKRQSRNGVPLLRLR  
QTHLQSORNCDQVGRDSEDKNWALKEQLKSWQRLRHDLERARLLVELIRKREKLKRETIKVQQIAMEMQL  
TPFLILLRKTLEQLQEKDGTGNIFSEPVPLSEVPDYLDHIKKPMDFFTMKQONLEAYRYLNFDDFEEDFNLI  
VSNCLKYNKADTIFYRAAVRLREOQGAVLRQARRQAEKMGIDFETGMHIPHSLAGDEATHHTEDAAEEER  
LVLLENQKHLPVVEEQLKLLERLDEVNASKQSVGRSRRAKMIKKEMTALRRKLAHQRETGRDGERHGPS  
SRGSLTPHPAACDKDGTDSAAEESSSQETSGLGPNMSSTPAHEVGRRTSVLFSKKNPKTAGPPKRPGR  
PPKNRESQMTPSHGGSPVGPQLPIMSSLRQRKGRSPRPSSSDSDSDKSTEDPPMDLPANGFSGGNQP  
VKKSFVLRNDCSLPRSSDSESSSSSSSSAASDRTSTTPSKQGRGKPSFSRGTFPEDSSEDTSGTENE  
YSVGTGRGVGHSMVRKSLGRGAGWLSEDESDPLDALDLVWAKCRGYPSYPALIIDPKMPREGMFHHGVPI  
PVPPLVLEVLKLGEMTQEAAREHLVLFVFDNKRTWQWLPRTKLVLVPLGVNQDLKKEKMLEGRKSNIRKSVQI  
AYHRALQHRKSVQGEQSSETSDSD

Canonical Epc-N

PHD 5.4e-12

Bromodomain 3.9e-35

AT hook

PWWP 4.6e-40

>Rnorvegicus XP\_342736

MGVDFDVKTFCNHLRATKPPYECPVETCRKVYKSYSGIEYHLYHYDHDSPPPPQQTPLRKHKKKGRQSRP  
ANKQSPSPSEVSQSPGREVMSYAQAQRMVEVDLHGRVHRISIFDNLDVSEDEEAPPEEAPENGSNKENTE  
TPAATPKSGKHKNKEKRKDSNHHHHSAPASAAPKLPEVVYRELDQDTPDAPPRPTSYRYRIEKSAEELDE  
EVEYDMDEEDYIWLDDIMNERRKTEGVSPIPQEIFEYLMRLEKESYFESHNKGDPNALVDEDAVCCICND  
GECQNSNVILFCDMCNLAVHQECYGVPIPEGQWLCRRCLQSPSRAVDCALCPNKGAFKQTDGGRWAHV  
VCALWIPEVCFANTVFLEPIDSIDIEHIPPARWKLTCYICKQORGSGACIQCHKANCYTAHFVTCQQAGLYM  
KMEPVRETGANGTSFSVRKTAYCDIHTPPGSARRLPALSHSEGEDEDEDEDEDEGKGSSEKVKKAKAKSR  
IKMKKARKILAEKRAAAPVVSVCIPPHRLSKITNRLTIQRKSQFMQRLHSYWTLKRQSRNGVPLLRLRQ  
THLQSORNCDQVGRDSEDKNWALKEQLKSWQRLRHDLERARLLVELIRKREKLKRETIKIQIAMEMQLT  
PFLILLRKTLEQLQEKDGTGNIFSEPVPLSEVTELDEVPDYLDHIKKPMDFFTMKQONLEAYRYLNFDDFEE  
DFNLIVSNCLKYNKADTIFYRAAVRLREOQGAVLRQARRQAEKMGIDFETGMHIPHNLGDEVSHHTEDV  
EEERLVLLENQKHLPVVEEQLKLLERLDEVNASKQSVGRSRRAKMIKKEMTALRRKLAHQRETGRDGER  
HGPSRGNLTPHPAACDKDGTDSAAEESSSQETSGLGPNMSSTPAHEVGRRTSVLFSKKNPKTAGPPK  
RPGRPKNRESQMTPSHGGSPVGPQLPIMGSLRQRKGRSPRPSSSDSDSDKSTEDPPMDLPANGFSS  
GNQPVKKSFLVLRNDCNLPSSDSESSSSSSSSAASDRTSTTPSKQGRGKPSFSRGTFPEDSSEDTSGT  
ENEAYSVGTGRGVGHSMVRKSLGRGAGWLSEDESDPLDALDLVWAKCRGYPSYPALIIDPKMPREGMFHH  
GVPIPVPPLEVLKLGEMTQEAAREHLVLFVFDNKRTWQWLPRTKLVLVPLGVNQDLKKEKMLEGRKSNIRK  
SVQIAYHRALQHRKSVQGEQSSETSDSD

Canonical Epc-N

PHD 5.4e-12

Bromodomain 9.3e-31

AT hook

PWWP 4.6e-40

>GgallusCAH65210

MGVDFDVKTFCNHLRATKPPYECPVGSCRKIYKSYSGIEYHLYHYDHDNPPPPQQPPLRKHKKKGRQGRA  
GAADKQSPNPSEASQSPGREVMTYAQAQRMVEVDLHGRVHRISIFDNLDVSEDEEAAEEAPENGGSKEN  
GESQAAAAAAPPKSAKQKSKEKRKDSNHHHHHNASAGAAPKLPEVVYRELEQDTPDAPPRPTSYRYRIE  
KSAEELDEEVEYDMDEEDYIWLDDIMNERRKTEGVSPIPQEIFEYLMRLEKESYFESHNKGDPNALVDED  
AVCCICNDGECQNSNVILFCDMCNLAVHQECYGVPIPEGQWLCRRCLQSPSRAVDCALCPNKGAFKQTD  
DGRWAHVVCALWIPEVCFANTVFLEPIDSIDIEHIPPARWKLTCYICKQORGSGACIQCHKANCYTAHFVTC  
AQAGLYMKMEPVRETGANGTSFSVRKTAYCDIHTPPGSVRRLPALSHSEGEDEDEDEDEEKGKGSSEKVK  
KAKAKSRIKMKKARKILAEKRAAAPVVSVCIPPHRLSKITNRLTIQRKSQFMQRLHSYWTLKRQSRNG  
VPLLRLRQTHLQSORNCDQDRTEDKNWALKEQLKSWQRLRHDLERARLLVELIRKREKLKRETIKVQOVA  
LEMQLTPFLILLRKTLEHLQEKDGTGNIFSEPVPLSEVPDYLDHIKKPMDFQTMKQONLEAYRYLNFDDFEE

DFNLIINNCLKYNAKDTIFYRAAVRLREOQGVVLRQARRQAEKMGIDFETGMHFPHCVTVEEAQVQDIED  
EDMRLLLSENQKHLPLEEQKILLERLDEVNAGKQSIGRSRRAKMIKKEITVLRKLAHPRDLGRDGLER  
HSSSARGVLSQSHNPCEKDLQTDSSAAEESSSQETGKGLGPNSSSTPAHEVGRRTSVLFSKKNPKTAGP**PKR**  
**PGRPPKN**RDSQIAPGHGNSPIGPPQLPIMGSSQRQ**RKGRSPRPSS**SSSDSDSKSTEDAPMDLPANGFSS  
GSQPVKKSFLVYRNDCNLPRSSSDSESSSSSSSSAASDRSTSTPSKQGRGKPSFSRVNFPEDSSEDTSGT  
ENESYSVGAGRGVGHSMVRKGI GRGAGWLSEDESSLDALDLVWAKCRGYPSYPALI IDPKMPREGMFHH  
GVPIPVPPLEVLKLGEOQTQEAAREHLYLVLFDFDNKRTWQWLPRTKLVPLGVNQDLDEKEMLEGRKSNIRK  
SVQIAYHRAMQHNRNKVQGEQSSDSES

Canonical Epc-N

PHD 5.4e-12

Bromodomain 7.7e-35

AT hook

PWWP 4.8e-40

>DrerioAAH44418

MGLDFDVKTFCBNLRATKPPYECVESCRCVYKSYSGIEYHLYHYDHENPPPPQGTPOKRRKGRPPRGS  
SDGPDSSSTGPGATSGQNTAPSSPAERSERSHSPVRETMTYAEAQRMVEMEIRGRVHRVSIFQNLDDVSEE  
DSGAEPPGATGSTAAACNGGGESGGGDRMDTANGEKGAQKTGKHKSKKKSDESGAHHHINTSGPAVKLP  
EVMFRELQDRPDAPPRPMS**SYRYIDKSAEELDEEVEYDIDEEDYIWL**DIMNEKRRSDGVAPI**IQEVFEY**  
**LMDRLEKESYFESH**NKGDPSALIDEDAV**CCICNDGECQNSN**ILFCDMCNLAVHQECYGVPI**PEGQWLC**  
**RRCQSPSRAVDCALCPNKGAFKQTD**DSRWAVV**VCALWIPEVCFANTVFLEP**IDSIEHIPP**ARWKLTCY**  
**ICKQRSGGACIQCHKANCY**TAFHV**TCAQQAGLYMKMEPVRET**GANGTS**FSVRKTAYCDIHT**PPGSARPLG  
GVGGVSADSSRSEAEPEEEEEPPAAEDDGKGSERAKRAKAKSRLKMKRARKILAERRAAPVLSVPCI  
P**PHKLSKITSNLT**VQRKS**QFMQRLHSYWT**LKR**QSRNGVPLLRRLQ**THLQSQRNTEPLPVTRDGEKHSVL  
KEQLKAWQRLRHDLERARLLVELIRKREKLKRETIKVQEMAMEMQLT**PLLVLLRRTLEQLQERDTNNFFT**  
**EPVPLSEVPDYLDHI**ERPMD**DFHKMWKCVESH**RYLS**SFEAFEGDFLQIV**NNCLKYNAKDT**IFYRAALRL**REA  
GGVVL**RQARRQ**AERIGFDYETGLHLHREPS**PENTH**THQDRERERVYIEGELLSES**WRRLPVDEQLQILQ**  
SRYEEAASGKHSIGQORRAKALKKEMTALRRKLAHPRDTLLLDTHSHTHILSKDGVCV

Canonical Epc-N

PHD 1.4e-10

Bromodomain 5.2e-24

>MmusculusBAC31528

MGVDFDVKTFCBNLRATKPPYECVETCRKVKYKSYSGIEYHLYHYDHDSPPPPQQTPLRKHKKGRQSRP  
ANKQSPSPSEVSQSPGREVMSYQAQRMVEVDLHGRVHRISIFDNLDVVSEDEEAPPEAPENGSNKENTE  
TPAATPKSGKHKNEKRRKDSNHHHSAPASAAPKLPEVVYRELEQDTPDAPPRPT**SYRYIEKSAEELDE**  
**EVEYDMEEDYIWL**DIMNERRKTEGVSP**IQEIFEY**LMDRLEKESY**FESH**NKGDPNALVDEDAV**CCICND**  
**GECQNSN**ILFCDMCNLAVHQECYGVPI**PEGQWLCRRC**LQSPSRAVDCALCPNKGAFKQTD**DGRWAHV**  
**VCALWIPEVCFANTVFLEP**IDSIEHIPP**ARWKLTCYICKQRSGGACIQCHKANCY**TAFHV**TCAQQAGLYM**  
**KMEPVRETGANGTSFSVRKTAYCDIHT**PPGSARRLPALSHSEGEDEEEDDEGKSWSSSEKVKKAKAKSR  
IKMKKARKILAEKRAAPVVSVPCIP**PHRLSKITNRLTIQRKSQFMQRLHSYWT**LKR**QSRNGVPLLRRLQ**  
**THLQSQRNCEQVGRDSD**DKNWALKEQLKSWQRLRHDLERARLLVELIRKREKLKRETIKIQIAMEMQLT  
P**FLILLRKTLEQLQEKDTGNIF**SEPVPLSEVPDYLD**HIKPKMDFFTMKQ**NLEAYRYLN**DFDDFEEDFNLI**V  
**SNCLKYNAKDTIFYRAAVRLREOQ**GAVLRQARRQAEKMGIDFETGMHIPP**NLAGDEVSHHTEDVEERL**V  
LLENQKHLPVVEEQKLKLLERLDEVNASKQSVGRSRR

Canonical Epc-N

PHD 5.4e-12

Bromodomain 3.9e-35

>TnigroviridisCAG11339

MGLDFDVKTFCBNLRATKPPYECVETCRKVKYKSYSGIEYHLYHYHDNPTPAQTVPQ**KRKRGRPPRASL**  
AGSGDTDDGGNGGGGGPGHGNTPGSPNRSEHSHSPGRETMTYQAQRMVEVEIQGRVHRISIFDNIDVVS  
EEDSDAEDLPPSGTGGTGGGVCNGSDGGGSELGGSGKDRPDIPSSNGGKSTPKTSKHKSKKKSDESGSYHH  
GAQSGPAVKLPEAVFRELQDRPDAPPRPMS**SYRYIDKSV**EELDEEVEYDIDEEDYI**WLKIMNDKRRKRDG**  
**VTQIQEVFEY**LMDRLEKESY**FESH**NKADPSTLIDEDAV**CCICNDGECQNSN**ILFCDMCNLAVHQECY**G**

VPYIPEGQWLCRRCLQSPSRAVDCALCPNKGAFKQTDARWAHVVCALWIPEVCFANTVFLEPIDSIEH  
IPPARWKLTCYICKQKRGSGACIQCHKANCYTAHVVTCAQQAGLYMKMEPVRETGANGTSFSVRKTAYCDI  
HTPPGSARPLGGVGGASIGSSHSEGELEDDDEGSIGHDDDSKGWSSERAKRAKAKSRLKMKRARKILAER  
RAAAPVSVPCIPPHRCVDAETYPNPQSDLSVVRMCVFTCLLFLSRLSKITSNLTVPRKSQFMQRLHSYW  
TLKRQSRNGVPLLRLLQTHLQSORHIDPLPPQPPDGEEKQSALKEQLKAWQRLRHDLERARLLVELIRKR  
EKLKRETIKVQOMALEMQLTPFLVLLRSTLEQLQERDTNNFFTEPVPLAEVDPDYLDHIDTPMDFQTMWNQ  
LESHRYLTFEAFEAADFLIVNNCLKYNKADTVFYRAALRLREMGGSVIRTARRQAERIGFDYEAGLHLPR  
ELSPETRDRDQERDREHLLLLENRRRLPLEEQLHYLQARLDEVSSGKHSIGQSRRAKALRKEISVIKRLA  
HQREGVSNMGSRDSVGGASCLPHHASSVGHLEGGESSQEIIGKELSVSSSALAPEVGRRTSVLFSKKN  
QKMAGP **PKRPGRPKN** DAGYSGGGISQSPIGPPQLPLLATARQKRPRSPHSSSTS DSDSDNEDLLPGL  
PSNGFDGGNQPVTESEFRVYRNEPRLPRSSDSESTSSSSSAASDRTSTTPSKQGRGKASFSRQEDS  
SEETSGTENDSYSVGGSRGVSHLVRGRARSGCWMSSDDYSSLEALDLVWAKCRGYPSYPALIIDPKMPRE  
GVFHRGVPPIPVPLDVLKLGEOQTQEAAREHLFLVLFDFDKRTWQWLPKSLVPLGVDQELDKEMLEGRK  
SNIRKSVQVAYHRAMQHRKSVQGDPSSETSDSD

AT hook

Canonical Epc-N

PHD 5.4e-12

Bromodomain 1.3e-26

AT hook

PWWP 4.8e-40

>CbriggsaeCAE60017

MGRGRGSGGGGASSSSGGIPLSEYQNIIDPLDEESLNDRTQTDQGLFDGKVVMLNYKSKASKTESMEARAK  
KWAASPEEKVSKFNKIFHPQSTKKWPPTMKEPPVESVAFFVHSTKGFGMPLKFFPE **QKYDHQRIVVKK**  
**AENPVDYSIDEHDI TWLMRMAHQASQGRMTLVATFEHWVDRLEKNSVWKPKEHHKLRDEHGEELEDVC**  
**NICLDPDTSNQNIVYCDRCNLTVHQDCYGIPIPEGCLECRRCVVSPAKRVSCVLCPSRTGAFKQVDHK**  
**RWVHVLSNFPLFQPPKIPPYLQCSSEKCTASFHVTCARNHGLIMRIVELDNGFVVKRFVWCPRHRPVETEA**  
**DKEQHERMLRNQKRENERMLPQISMPTLTNGIISQIQSERPFAYFREIVLFWYQKRQNLGAPLLKTWTP**  
PESLIIDLFKTPGERRRGSSGVRATTTTTILLDSEELEKKKEEFEMGIQKAMEMFAAVMDEEKDKIEMSK  
SSLKMLELGFKTNEMYCAETLENIKRKDTVKVFEKPVQLPIYTTI IKNPISFEEMTKKAAEFKYNISITQL  
**QADIALMLTNCISFNKKNPYKYGITFKRQTPMLEAARAEAAARSERRNDKELMTEILNGFLNANSEA**  
**GAEADVEEDSGAPDGGSGGAGKRGRRRRSPGKGVKDVKEEIKMEEPPASALPSKRGRKRAIQTFLTRGV**  
**EAPSTSESPGAPMNLNAASTFFKPPQTRLFRGAGVPGIHKKFGASICETPKTSGPQKQTKMTAFQTLTRGV**  
**TFEDEKGGGDKDGDPKQKTKNKKDNNEKSDCQQQHILFQSITTPSNSTKLPNSFTSILASFTGIPTIPR**  
**PVTRSSTTSTNSGDSAASTSETPKIQKSKFRISALQSPLPDPKRVGIRAMDSEDDDDDEEILIQPIQK**  
**TLSPPEELKTEQLRCAENESKSKFAHNQLVIVEGRAAKVIDYHLAHLSDIHLEQRQSMLKKRREVLAEPLS**  
**SAPIYVEFFQKSNILENFQWVPSEKVELLDLNNCAQKGITGLKAAKECIFHFFFSKNDRFVFPENSIH**  
**FLVPVFLTKKNQ**

Canonical Epc-N

PHD 1.6e-06

Bromodomain 9.6e-14

>CelegansAAB03164

MGRGRGVAIQETIEECRDTISDRIQYNLGLNESKVVLMDIVTGNQNVSLQERTKRWMAVSDARMTKFK  
KNFYPTNQNSKNISKDLDPPIQRVDAHIVTPVAGKCGMPLQKFFPE **FKHDHEKIKIERDAKYVDYSVDEF**  
**DMSWMSIMNAKRTKLGLEIFSVAIYEHVDRLEKMCIWKPKEFHKLKDENGEELEDVVCNICLDGDTSNCN**  
**QIVYCDRCNLSVHQDCYGIPIPEGCLECRRCGISPAGRVNVCVLCPSSTTGAFKQVDQKRWVHVLVCIWVD**  
**ETHFGNTIFMENVQVEKALHRRALSCLLCKNRQARMGACIQCSETKCTASFHVTCARDSGLVMRINE**  
**TEDGQVNRVFWCPKHAPPLTDADREMRQLMLRNARRENERKGPMSMPTLMKSMISTICVERPFDYSEI**  
**IYFWYKRLNRLGAPLLKNFTQGASKSRLLLPKSTICGQLKNVETCEMCKQVNAVKESLASGLEIFDMIV**  
**RREERKDKMLNSYIRMFERGFKPTELLCOEVIEALKTIDAGKVFAPVELVGYTDI IENPICLKDMSKA**  
**ASGYSTVAALSADVQLMLSNCATFNKGNRVYIKYGNTRYRKDSTPILEIAEKEEVERLALKTDEKFMQTQL**  
**LNGVMVEYNGWAQSRNEVAKEIPPPTPSRGRGTGRRRQNPFLDVQELDTDDSKDSSALSEIPGSSKSSR**  
**KRGIQDTKMEDEEIKPSTSGTNAVASVPLLSSSRESKNKSSDADVSSPKSSWLGSPSTSONLRRRVQ**  
**GFSGNESSPKVHKKLSTDNPSNSNLROTTLTNFFGTNPKTQQQVTFADMTATPSGSGNKNVSQRSFLDTP**  
**STSKASSFTLSSTRPSTRSTSIIPTINKNAFRMSSASIQSPLPTTKKIGVRAMATDDEEEDIVIQPPP**

KEMTTQELEAEKLKSAENEAMSKFAHNQLVIVDGRAAKVIESRLAHLASDIHHEQROQSMMKKRREVLSEI  
PQAAVIYVEFFQKSNTLENFQWVTPDKVELLDLNNIGQSPKIPGLKAAKEWHQKVLNGEDV

Canonical Epc-N

PHD 1.4e-06

Bromodomain 4.6e-20

>OodioicaAAS21398

MEDNIKEEADFTLAKQYKGRDLNPDIDVQSYINKIDAESAVYYPVYCPKCGRPYKDEVMLLEVHLDSEFDHNN  
PPDDYDPCDLHWKPKRVERLKEEFERESRDSGSDTNGPSTPKNTRTPGTRGFGSHKRKRNTWSRKRKAN  
FRRGSDVSDTPRTKTRVRVDEHGRIITENLTWSEAQRLVEFEDDNTNKIYRVSIYEDVEVVKSDGSELPA  
LHKGARVVPDTPVTEMEVVKLQIRKISSEYIDYKAQPTENTIEYEMDEEDHVMLEHINDVRESGLKPL  
SCETLEKFFIDAIEKESMWDTGKPKRTSTRDIEDEDVCCVCNDGECTNTNAILFCDLNLAHVHQCXYGVP  
YIPEGQWLCRRQCFSPSRPVDVLCPSLNGAFKQTHDNRWCHVVCALWVPEVSFQNPVFLEPIDGFSKVP  
KARWNLKCYICKKAGACIQCNKNACYTAFHVTCQQAGLYMEMKVQKSDGINGITSNKVTTQAFCHNHTP  
KDWSPRPLKSSEKLPKAAANRADQFQAKVDETREAVEGRNSRSVNIPIYIPSDKLGVLRAILSDNVTSKVS  
PLFKQLLTFWNEKSMVCNGVHLEQLRVWQRLRHDLERARLLVEQIKKRERLKAHEIQKQIQLMRLRINPW  
SYFLRDIIDKLEKELDESQIFYHPVTDIAIAPLYSKIITSPMAFATMERKVTNSEYKCFAAFEYDVLNLIILRN  
CMHYNGNSTIFYKLAQDMETKAQPMRLDARKLAKKYNTVTGQHLQPGDKFDQKEAEVEHIRGVLGDLRKC  
LRKAQKSPSSKHQKKTQVQKLTADIKIFERRLEPTMGVEEFETSSPKKAKLEENKNEEEDDEFKNEPDTETE  
EPQEEVDEGQAVDDKDEVESADDDVKEEPDESPPVENGETTPLTEVHENGQELKDPPEEPTLKKELAN  
GTVKEPAENELSQFIEEDSNDSQEEIKSSNKKIDLRFQPLDTGYPWYPARIINPELTTGPEPLLLGDEEII  
PQPSVDIIKAGNRLNLEGDSQHHLVLFQDQKRTWMWLP SNKIALLGKDNKFDNTKLREGKTNAQKKSISR  
AFKCALEPLSPD

C2H2 0.00089

Canonical Epc-N

PHD 1e-13

Bromodomain 7.8e-20

PWWP 8.9e-06

>UmaydisEAK86867

MPGIPSKPNNIPLASSLPKVSFRKVPPEEALLFRIPPGFIDAQALPFGYNDGSEYDKPDHYIRYVEPIEG  
DLKKQVEYDMDEQDQEWLDAFNRYERRKEGLDSISYEIFEIILDQLEKEWFDLMKRIPPKARHSAATEVAA  
EGADADDADSEGGDDSKCAICDDGECENSNAIVFCDCNLAHVHQCXYGIPYIPEGQWLCRKCTVSPDRAV  
SCILCPHEGGAFKQTTTGWKWAHLLCAMWIPETGVSNPVYMEPIDSVIRIPKARWKLQCYLCRYRMGACIQ  
CDNRSCFTAFHVTCARKAGLLFRTERTRVSHHLYDDSDNDDGSEVLRACCHRHMPADLRHQFKIDFGR  
QAALEDDRSEASYRASPFVSSRTRELSVESGKGAPLISVSRSSLVGSNESATATSDPRSTSKSARAYKK  
SFKAGPPLVPAYIANRVLEYITKVQLRKKATVVQLIARYWLSLKREARRGAPLLKRLHLEPWTASSQKQEQ  
TDAQKAKKLHFLRSIREDLERVRMLVEQVRKREKEKLRQAQEI RNSLIEPVLFPFHTDLRAAIKLEAVD  
RYGFFAQPVSKVDVDPDYDIVKDPMDWATIKDKIAHKAYDTVEEIRQDVLMIATNAMTYNKADTPYHKAA  
SKILKMIPEVFKELAAIETSHLVYHQKRVQAEPTTDTDSKEGSRKHAFVTSDTSNKQIYTIDAESRRQL  
IELGLEPPSDLVSLRDYCLMEEEEQLQIROQAYNTHPMPPTTHVKAEEHGHADNQADPTASQRRRLTAP  
VMNLMEDFVQQLYVPPRPAPVERDSLPGSANGKRSARMSAAVPAEKTSVRAARKRNPSSDSQKPEPVERR  
STRRSIAAETEAEVKSEQAIAEALPATPVRSRRRSTOSSAHAASTEHI DAQSDARPOSSMOTSLSQTS  
KTQDGVQVKADVGAHDSFLLFNTGWVLEPGSKRHRSSAARPEMIGQRPRKISAPESPVAFGASRAAKSS  
PTTPQQRPRSRTPSTDPSPASSTAKAKDSSSTRKEAGSKPDRRNSKDTDRAASSPLTTDDEGEKHAG  
AQSARKPNRLKRNRRGEELSAASQAGSEASNETASTTRRSARQATSLIDPSASPPAAKRRRAECKVSRSK  
EAFDYVTHPPAAGTKVWAKVETFPHPFAIVIRDKTDLPGEMLRTPPEDESMVAVRFFGKQTSYGWITPLK  
LAPLLMDESEDEKYLKLAACKGKTKQVRDAYEAKSY

Canonical Epc-N

PHD 2.5e-15

Bromodomain 5.7e-23

PWWP 7.1e-08

>DdiscoideumEAL65544

MVMMEGVTPPTAKVIPFSLKKKKPAALVPTTATVATTTTTTTTTTSTTNQNSNDNTPVVIETNNNNNNNN

NNNNNINNTTETIATTTTETTETTATIENDSPTISSEKIKTSTMEPINPASIISNNNNNNNNNNNNNNNNNNNN  
 NNNNNNDNDNNDTDMKNIIEDEEEDLYTDITFVSGPSTNVEAEDEQEVEKQPQOTQPOQQQQORLDIN  
 KKTDTNINGVIQMDTDSKSLSSSSSSSSRYQKTPKKNNNNNNNNNNSINNKANNEAFFDKDSFKIKLQVI  
 NPESYSEEEIQDINLNSVTSEVYMNPTTLGDKLQHQHQHQHQKQKQKNKNTTSSNNNNKNNNNKNNH  
 DHAGSKDQINSLEDEKRYTQRYRYSNEEILNKPVFKEIEESPMAPYNKPSGYIIYQEKSSSEMLHDEVE  
 YDMSEDEKWLLEEFNKTTNNNYSIEDIFEYVIDRLEKETFKYKQEIIGSDMFPHFSSVEADDVCGVCFDGT  
 DDTNQIVYCDGCDIAVHQDCYGILLIPEGHWFCQKCESPKDSISCVLCFKKNGSFKQIDGGEVHLVCA  
 YNIPELSQIIKKGSGREKLGPPGLLSNILKKRKKLCCIICKKIGGACIQCRERHCSVAFHPYCIKMNQKS  
 MIDENLNPHIIFCKKHFLRNNNINGNVKDILDDGSSSDGSEKENSDDDDDYTDSSDEHDI SGDDDDND  
 DNDDDSFEVIKTPSKKSHISNKSSKSTPSKSNTNLKSKPQPPKPKLKSJKSTPSKKNANHKKKKKIDS  
 TDEDESDNEKEDENEDEDEDEDEDEDEDEDEDEDEDEDEDEDEDEDEDEDEDEDEDEDEDEDEDEDE  
 TDSNNNKVATVTAKDTTTTTTTTTTTTTTTTTTTTTTTTTTTTTTTGI TAKKVGLISSRAAKVIRKVPSTFVHAVYDYWV  
 KKRISRSGLALIKRFQPSILFSLRSTLHAKDPGINSVSDYNKMLSIREDLERTRTILELVKKREKQKREL  
 IINIRNEIESTILNDYYFLRMVLKSLESIEQLRPFYVVPVLEEEAPSFLI I KQPMFQOI KQSLNTYAYE  
 NTDDFWKDITLIYTNAQLFNCSKTSVYKASRLLEIANKLESDCPPKVTPEELDDFIKNIKYPKLLTT  
 NHKKFSTPLKSVSSSSVSSSSSSSNTTNTQSTPIKTTPTETPKPTSRTSRMVAQEQEQEQGKGKEKEKEKE  
 KEQKGKGKEKEKEKEKEKEKEKEKEKEKEKEKEKEKEKEKEKENEQVIPPKRRGCPSQPAPRTRQS  
 DSKLASIEPTEDQRLSKTPPTSKATSSKTTPITPKTPQPTTKTPQPATPKTPQPPRTTPTSSSKTPNI  
 TSPMSASKIITRSSTPSKTTLOKKEIPPQKITAKQTPQRIKPTLKSQOVI PATTSTISRTRNLOKQ  
 EETLENDQIQKELVEENENENENENENENENENENENENENENENENENENENENENENENENENENE  
 EEQKGI IQGDEIDTDEDYGVKRRKSSLSPLKLTIPNTNQLMLLDTMNTQTEKKSRKSI LDQTTKDLF  
 VVPQIIKRVAIMSQKHIPLINFSKEITDDLRELLSITQEIQSIEKGGFLSHANRAVSSKEGLKFI EHI  
 DLRIFRGTYDHDKFLFWYHLEKIAQRIPPQFSKSKLTLEKISELKEKYEQNHPEILDEENNEEENDE

Canonical Epc-N  
 PHD 4.7e-14  
 PHD 3.1e-05  
 Bromodomain 5.3e-18

>TnigroviridisCAF96088  
 MKKRARQHRPSVPRRPPSSPIKPSPNKQILTYAQORMVEFDVDGRVHRISIFDKLDVIWDDPTAQEMME  
 CTSNKENAEKPOQQQILVRSVRLKNNQEKRNAALGLTGHGDGENHASVHSGPKLPEPKFRTVEYNLPA  
 VPRRPTTYKYAEMTEEELDEETEYDMDEEDYAWLELVNEKRRSEGVSQVSFNVFELMDRFEKELYLEN  
 LDQGSEMHA AIDEDAVCCICMDGECNNSAILFCDMCNVAVHQECYGVPIPEGQWLCRHLQASSQPAE  
 CVLCPNKGGA VKKTEDERWGHVV CALWVPEVGFSTTTIEPIDGVGQIPPARWKLTCYLCKEKGVGACIQ  
 CHKANCYTA FHVSCAQKAGLFMKMEPVTEVKESGEATFSVRKTAYCGAHTPNGCVRRLTIYEDSQPKNG  
 LCKKADRSLAKGHSKQKQKRSKKNKPETESESEEP TAPAPSFP AHRLQNLNQS I QKKKAFVELV  
 LNYWKLKRQSRNGHLIRRLQTS LHAQKNTQLGQNEEESRALKEQLKEWHRLRHDLERARLLLLELIRKRE  
 KLRKEEIKQHETLMEMQLTPFSILLRALLDQLQMKDQARIFAQPVDVSEVPDYLDHIKDPMDFSTMRQRI  
 DAQSYNLDQFEKDFNLIIDNCMKYNSKDTYFYRAAVRLRDQGGALLRKARRDIEKIGFDSSEGMHL PDA  
 PKIQDSPPFSWEDVDRLLL PANRQHLPDPKQLQQLLEKLDLTC SMKSSPSRSKRLKLLKKTINDVRSEMS  
 LSRVVP SAHHPSSPTPTSTPAHPEPSAAADKEKSKSNGHFTDDEGD KSLPPKLELSDSIPPLIHSADPE  
 PPTLKPIDAAPDRGGKARRKSADSDGEI PQLLPSVPHLNGYAHGDAASSLLEGDATTA EAAGAVNRR TAV  
 LFRKSKAASPHKPPRDGDRATDVGA EAGKEGQDAEAQLGLQILPVGGLSSGFLGEEEEKELSEPSRAG  
 QAVEPRRRCASESISSSSSSLQGSTSTTL SLPKCGKGPALVRRNTVEDKSEL IACIETGNFAKARIAA  
 EVGNSNIWMPASAATVALEPLKLVWAKCSGYPSPALI IDPHMPRAGCQHNGVSIPTPTDVLRIQEOMQ  
 YKAEEKLYLVLFDDNKR SWWLPKSKM VPLGLDKTIDKIKMMEGR TSSIRKAVQVAFGRAMNHL SIVQDEP  
 VSDLSDVD

Canonical Epc-N  
 PHD 3.1e-10  
 Bromodomain 1.3e-34  
 PWPP 1.3e-19

>CneoformansEAL20164  
 MPLHDLPKVSFTLITDDPALLHPAGVQSEQSRSYGNDFSDFERPEHYIRYIEPIESELAVQVEYDMDEQ  
 DQAWLDTYNAERKKDQCGPISYEVFEIIMDKLEKEWFNLSKRIPQPOQLAPEDSKCSICDDGEGENSNA

IVFCDGCNLAVHQDCYGVPIPEGQWLCRKC TVSPENPVSCIFCPNEGGAFFKQTTTGHWAHLLCAIWIPE  
TTLGNSIYMEPVESVELVPKGRWKLVC SLCKERVGACIQCENRNCFTAFHVTCARQLGLLKSMKSLTTDG  
TLHAYCHKHMP LDESKDQEVEDEEEEDDGWEVSPRNHHAHAKTKSKTQSSKSRTSKSHPTPTAKRPAQPL  
VIPVTKKSAQAHSKSFRRPGPIIPKMIVNRILEYVGKVLRRKKPQVVEKICRYWSLKREARRGAPLLKRL  
HLEPWTA STAARTQTESEKAQKLFLOMLRNDLEKVRMLADLVRKREKEKLRQAQVIKDVDRFIFPYSE  
RLRVTLERISAMDRREMFLNPVTPAEADYS DIVKEPMCWLY IDEKLEKNAYIDIADFKRDI MLVLDNAM  
LYNARDTPFHRAASKLKTA AQP LLNELDSITASRQSTSTESLVPSDLVPGDLEPALPHILAFFOETT VSS  
QPEEPQDLLTSLFATELEPPKPTPTPSPPPQPRKYRRPTKEEKQKKWNALVKERQEKGLGRSTRGTEKL  
TREFEEEEAGLAAAATQREKSTPVPAEEGNMGIDHDGRAVRRSTRNSLGGASSAVSTPKSAPRQRKREPA  
QVPVAEEPSRSARSTSTILPPTRQQRGVIGLEALPLLTTKERLEQERALDLTTTEIDAADQFKRFVNGWV  
LPEEEEEGEIEVTTPKRSKGNAVEPENGGFIEAADDDSDLSPPTSLPGSAAPSRATSSVAKPADAHG  
SDIENDARSDEDEDLQTEKPKPDLEGQDQETISHGTKRKGESDIETPVREKKRSKTTQAKEEKVAKAPP  
KKGKRVKALYPPGTLVWAKIHTFPFFPAEIVDLIDDRDEVPDAVLKEETASRAAAKNVNKDVVLRVFFDA  
RSSYGWITGDRLEDELGEDENV DAMYLAGKDREGKSKGFKTPSLKRACRKG YRDALNSMETSANEGGRKEK

Canonical Epc-N

PHD 7.1e-16

Bromodomain 8.9e-18

PWWP 2e-05

>HsapiensNP\_056510

MRKPRRSRQNAEGRSPSPYSLKCSPTRETLTYAQAQRIVEVDIDGRLHRISIIDPLKII TEDELTAQD  
ITECNSNKENSEQPQFP GKSKKPSSKGGKESCSKHASGTSFHL PQPSFRMVDSGIQPEAPPLP AAYRY  
IEKPPEDLDAEVEYDMDEEDLAWLDMVNEKRRVDGHSLSVADTFELLVDRLEKESYLESRSSGAQQSLID  
EDAFCCVCLDDECHNSNVILFC DICNLAVHQECYGVPIPEGQWLCRCCLQSPSRPVDCILCPNKGGAFFK  
QTS DGHWAHVCAIWIPEVCFANTVFLEPIEGIDNIPPARWKLTCYICKQKGLGAAIQCHKVNCYTAFHV  
TCAQRAGLFMKIEPMRETS LNGTIFTVRKTAYCEAHSPPGAATARRKGDSPRSISETGDEEGLKEGDGEE  
EEEEEEVEEEEQEAQGGVSGSLKGVPKSKMSLKQKIKKEPEEAGQDTPSTL PMLAVPQIPSYRLNKICSG  
LSFQRKNQFMQRLHNYWLLKRQARNGVPLIRRLHSHLQSQRNAEQREQDEKTS AVKEELKYWQKLRHDLE  
RARLLIELIRKREKLKREQVKVQQAAMELELMPFNVLRLTTLDLLQEKDPAHIFAEPVNLSEVPDYLEFI  
SKPMDFSTMRKLESHLYRTLEEFEEFNLI VTNMCKYNAKDTIFHRAAVRLRDLGGAILRHARRQAENI  
GYDPERGTHLPESP KLEDFYRFSWEDVDN ILIPENRAHLSPEVQLKELLEKLDLVSAMRSSGARTRRVRL  
LRREINALRQKLAQPPPPQPPSLNKT VSNGELPAGPQGDAAVLEQALQEEPEDDGD RDDS KLPPPPTLEP  
TGPAPLSQESEPPEPPTLKPINDSKPPSRFLPKRQVEEDELLEKSP LQLGNEPLQRLSDNGINRLSLM  
APDTPAGTPLSGVGRRTSVLFKAKNGVKLQRS PDRVLENGEDHGVAGSPASPASIEEERHSRKRPRSRS  
CSESEGRSPQOEEETGMTNGFGKHTESGSDSECSLGLSGGLAFEACSGLTPPKRSRGK PALSRVPFLEG  
VNGDSDYNGSGRSLLLPFEDRGDLKPLELVWAKCRGYPSYPALIIDPKMPREGLLHNGVPIPVPLDVLK  
LGEQKQAEAGEKLFVLVFFDNKRTWQWLP RDKVLP LGVEDTVDKLKMLEGRKTSIRKSVQVAYDRAM IHL  
SRVRGPHSFVTSSYL

Canonical Epc-N

PHD 4.3e-08

Bromodomain 2.2e-35

PWWP 6.4e-28

>DrerioCAI20717

GPPMKRKSQPLNIFTPHREPLTYAQAQRMDVLEVDGQLHRISIFDKLEIITDEDPLAQEI IKCISSENA  
EKHLQISEYSAQIKNNNQKNTSDSSIQGSILPEPKFHTVDYNLPVIPS RPS TYYKYKQKTVEELDQEVE  
YDMDEEDFAWLDLVNEKRKDEGLNLVSFDDFEFLDRFEKESFLESQGH TLQSIDDED AVCCICMDGDC  
MDSNVILFCDMCNLAVHQDCYGVPIPEGQWLCRHCLHSPTQ PANCILCPNKGGAFFKQTEDDRWGHVCA  
LWVPEVGFSTNTVFI EPIDGVSNIIPPARWKLTCYLCKEKGVGACIQCHKANCY TAFHVSCAQKSGLFMKME  
PIKVLTDSGIPTFSVKKTAYCGAHTPNGSVKRPLAIYKDN ETNYGLCQLVDRKSSRIGFNKQKRLKKNEE  
AIVTTI PPLSVPSFSSERLSPILNQVSLQKKTAFGELVLSYWT LKRQSRNGVPLNRRLQTRLHPPKNSQR  
KQTEEETQALKEQLKEWHLRHDLERARILLELIRKREKLKREEVLLQOTLMEFQLTPTFTVILRAVLDQL  
QEKDQAHIFAEPVNIKEVPDYMDHVLHPMDFSTMSKRIEAQGYKYLDEF EADFNLITDNMCKYNGKDTFF  
YRAAVKLRDQGGAILRKTRRDVQRIGLDLETGLHLLPEPKIEPSV PFSWEDVDRLLPANREHMSFEEQL  
RELLEKLDMTTAMKSSPSRSRRLKLLKKNISDVRL ELSLRKALTAVKLNAAEEEVGHIHQKGDKSVPPK  
LEPSVSVLPLINAESHSEPPTLKP IEPNPKHSHQKDGISQSLNGDSHLLLEDSDIN VVATSTLAEPSSP

VNRRTSVLFRKSKSSTSPRLRTLKDDETLKGSSQIGTKTFLSVVIPRLETLLHTRKRPRSASGDSCKDLP  
VKRLDTELSNSFGLNSERELSSSSQPRQRCTSESSMSSSNSSIALNLTCKGKGPALIRRNTVEDKSEII  
ACIESRNFKAARIAAEVNSSSIWMPNSAATVLLLEPLKVVWAKCSGYPSYPALIIDPQMPRVGCQHNGVS  
IPMPPLNVLQIGEQMVKSEEKLYLVLFFDNKRTWQWLHKS KMVPLGVDKTIIDKIKMMEGR TSAIRKA  
VAVR  
TAFNRAMNHLNHVQDEPVNDFSDVD

Canonical Epc-N

PHD 1.2e-09

Bromodomain 2.6e-29

PWWP 4.4e-21

>AgambiaeEAA03942

MGIDFEVNDYIKTLKKGDPFKCPMCDKTYKSVIGLQYHLNNYDHDNPSPAVPASVSTPIKQKGRKLVG  
VTPKNQIACSPKEGITYLESEHLVRLDCNGKTVKIPVLDALPVMSLEEYESKCKTASDFEAFVAPPEE  
PEVQLPEGKFKEIEDYITICDAPARNAYIRFIEKSSEELDGEVEYDVDEEDTTWLSIINERRAAQNVGPV  
SVDSLELLMDRLEKESFFQAAANGQNGAVVDDDAVCCICMDGECQNTNVILFCDMCNLAVHQDCYGVPI  
PEGQWLCRRCLQSPSRPVDCVLCPNNTGGAFKQTDHNDQWAVHVCALWIPEVRFANTVFLEPIDSIETIPAA  
RWRLTCYICKQKIGACIQCNKTYCYAAFHVTCQAQAGLCMRMDTVKGTDSNPVVVQKTAYCDAHTPLNA  
LQTTTPGNSPDGGPPTDAREVTREKMKKARKLLALKRTSAPVILIPTIPQNRIEEISSLVNIPKKQQFIQR  
LIAYWTLKRQYRNGVPLLRRLQSQAQGTGMPGCRDRDTGSDPAQELYQQLKYWQCLRQDLERSRLCE  
LVRKREKIKLILIKTTEQLVMAQLNP IESVLHRILDQLEVKDDKEIFREPVDTEVPDYTDIVKHPMDLG  
TMRQKLRGAYIRIEDLEQDFQLMIRNCLAYNNKDTMFYRAGVVRMDAGAI VFRTRVTRKELERSGQFQEP  
A  
PVEPIASSALSGRAIGSSSEDNIAMDIENELTKITGOSANAHEIGKLOTLLSKANGIRHALTRSKRIKQI  
RNEIARVKRAISKDPERASSSFSPKLSHSMHAAPTSSGLGGLAGSSLALAQKHHQITPEASPLKVLQNS  
PSPSGVNRRTAVLFRTRKAQAALKKPDASLKQEGAGVGASGGTGGAGGPGSTVTPMTTTELLQKTAKKIN  
RGKRIGKSGKIESFLEATSASALDGKPIERKSLEAIPDSFRVYRGQDREISDSESNSLTGSTCSSCS  
GFSGSGTESEFGGRRTSACGEGFEATNFVCLLSYGLALAPAMTIRTVTRMSTNSEPEVEPFPEKPALEPL  
KLVWAKCRGYPWYPALIIDPNIPKGFVHNGVPLPAPPADVLALRSNYDEPVFLVLFDFDKRTWQWL  
PVGK  
LELLGVKDELQSKLIESRKP TERKAVNKAYQEALHYHSQV

C2H2 0.0027

Canonical Epc-N

PHD 2.3e-11

Bromodomain 3.9e-29

PWWP 2.9e-17

>PtroglyodytesXP\_518433

MTDRSRVRDPCLSQLDPNVHSPLIGLAPWRAGPWCAGIAAGADPVSCSVSPRPHRHRLSPQFPGAMRKP  
RRKSRQNAEGRSPSPYSLKCSPTRETLYAQAQRIVEVDIDGRLHRISIIDPLKII TEDELTAQDITEC  
NSNKENSEQPQFPGKSKKPSKGGKESKSHASGTSFHLQPSPFRMVDSGIQPEAPPLPAAAYRYIEKP  
PEDLDAEVEYDMDEEDLAWLDMVNEKRRVDGHSLSVADTFELLVDRLEKESYLESRSSGAQQSLIDEDAF  
CCVCLDDECHNSNVILFCDICNLAVHQECYGVPIPEGQWLCRCCLOSPSRPVDCVLCPNKGGAFKQTS  
D  
GHWAVVCAIWIPEVCFANTVFLEPIEGIDNIPPARWKLTCYICKQKGLGAAIQCHKVNCYTAFHVTCQA  
RAGLFMKIEPMRETSLNGTIFTVRKTAYCEAHSPPGAATARRKGDSPRSISETGDEEGLKEGDGEEEE  
E  
EVEEEEQEAQGGVSGPLKGVPKSKMSLQKIKKESSEAGQDTPSTLPLAVPQIPSYRLNKICSGLSFQ  
RKNQFMQRLHNYWLLKRQARNGVPLIRRLHSHLQSQRNAEQREQDEKTSAVKEELKYWQKLRHDLERARL  
LIELIRKREKLKREQVKVQQAAMELELMPFNVLRLTTLDLLQEKDPAHIFAEPVNLSEVPDYLEFISKPM  
DFSTMRKLESHLYRTLEEFEEFNLIIVTNCMKYNAKDTIFHRAAVRLRDLGGAILRHARROAENIGYDP  
ERGTHLPESPKLEDFYRFSWEDVDNIPENRAHLSPEVQLKELLEKLDLVSAMRSGARTRRVRLLRRE  
INALRQKLAQPLPPQPPSLNKTVSNGELPAGPOGDAAVLEQALQEEPEDDGDGRDSSKLPPTLEPTGPA  
PSLSEQESPPPTLKPINDSKPPSRFLKPRKVEEDELLEKSPLQLGNEPLQRLSDNGINRLSLMAPDT  
PAGTPLSGVGRRTSVLFFKAKNGVKLQRS PDRVLENGEDHGVAGSPASPASIEEERHSRKRPRSRS  
CSES  
EGERSPQOEEETGMTNGFGKHTESGSDSECSLGLSGGLAFEACSGLTPPKRSRGKPALSRVPFLEGVNGD  
SDYNGSGRSLLLPFEDRGDLEPLELVWAKCRGYPSYPALIIDPKMPREGLLHNGVPIVPVPLDVLKLG  
EQ  
KQAEAGEKFLVLFDFDNKRTWQWLPRDKVPLGVEDTVDKLKMLEGRKTSIRKSVQVAYDRAMIHLSRVR  
GPHSFVTSSYL



Canonical Epc-N  
PHD 4.3e-08  
Bromodomain 2.2e-35  
PWWP 2.9e-27

>DpseudoobscuraEAL24777  
MGLDFDALEYCKGMKNKQSPPPYACPV<sup>RDCGRSYKTIMGLQYHLVKYDHDN</sup>PQPLTPVLT<sup>PNRKKARSRS</sup>  
THHSTPKPKDNGSGGDASIVS<sup>GEAKNGCSGSSSGSTRHQYANPESLVAYNEEEATVTFNIEGKSVRLGID</sup>  
DALPMVEEDEFVALVERGCILNADAPPLEENAPWAKVQVPVAKVCEIEDYNVPDAPPR<sup>LAYYRFIEKSL</sup>  
<sup>EELDGEIEYDVDEEDSAWLEHMNEERQKLG</sup>LTA<sup>VSIDTMELLMDRLEKESHFQ</sup>AAANGTPTGVEVDDAV  
<sup>CCICLDGECQNTN</sup>VILFCDMCN<sup>LAVHQDCYGVPI</sup>IPEG<sup>QWLCRRCLQSPSKPVNCVLC</sup>PNAGGAF<sup>KQTDH</sup>  
<sup>GQWAHVVCALWIPEVRFANTVFLEPIDSIETIPPARWRLTCYVCKEKGLGACIQCHRNSCYAAFHV</sup>TC<sup>AO</sup>  
<sup>QAGLYMTMDTIKDGHNDS</sup>SMHV<sup>QKFAYCHAHT</sup>PADAKLKMNVPDFEDTRHKMREARKALAKKRSTAPVVL  
<sup>IPTIPPDRVQEIATMVTM</sup>QKKKEFL<sup>DRIIAYWTLKRHYRNGVPLLRRLQS</sup>QGHNHGVIQRNGIEGSPDTN  
ELYRQLKYWQCLRQDLERARLLCELVRKREKLKVA<sup>FVKI</sup>SEEV<sup>VMLQLNPLESALT</sup>TKLLDALEARD<sup>TMEI</sup>  
<sup>FREPVDTSEVPDYTDIVKHPMDLGTMRTRLKDCQYTTLEQLE</sup>TDFDLMIQ<sup>NCLAYNNKDTV</sup>FYRAGIRLR  
DQAAPLFVQLR<sup>KELQRDGLLERSQRSHVDHVEAEVEQELRQLLAVPASE</sup>DIVQKLLILADKSQVLKNPSY  
RTKKIKQIRLEITRMRKSLQKARYAARHSSVHANRSR<sup>SDEDEARGGQGS</sup>PSKKRSR<sup>KRLNTIAMDMLEQ</sup>  
DEDLEDEDDSEEDSVGDGDEEA<sup>AKNMLNTTQTPPCSPIKSLNNS</sup>SSSPVGINRRTAILLTRKSQAALKRPS  
EPLTTPVKEEHNSQSSSSQISVSASASSSSNATVATAATS<sup>VASLNSVLAAPNASASVANFALTQNSSA</sup>  
GAGVAGVSASPASGALAGAAAAASLTSTALSIS<sup>SKMSLNLGVKSPKRPGRYRRLPELRNSASMPKK</sup>  
SPNPAASGQAMP<sup>LPDARL</sup>FERIPDSFRVYRANNQR<sup>DVSDSDEG</sup>PSQSSSPCSSCSD<sup>FSISGSCSDFSDSDE</sup>  
ASDGHSEERESTSQDGT<sup>TDAMD</sup>LQHASL<sup>NNSQGNMAISSSSGASGSSSEDEAVMDGQTPH</sup>Q<sup>KRRGRPS</sup>  
<sup>KTRTSRSTPTPTPI</sup>PMAARGP<sup>VMSAARGR</sup>GKRRSNLSE<sup>STTSSTATPPPIMR</sup>KAGK<sup>RSATPSIVSPLVN</sup>  
NIKARRNTTATAT<sup>TNNNR</sup>SRHGEDAEEV<sup>VTMTRHNSHKPTLEPLQLVWAKCRGYPWYPALILD</sup>PK<sup>TPKG</sup>  
<sup>FVYNGVPLPAPPTDVLALRKNCLDDIVFLVLF</sup>FDV<sup>KRTWQWLPANKLDILGIDKKVDQOKLIESR</sup>KPAER  
KAVKKAYQDALHYQSQVSDLEGGPDPIM

C2H2 0.0032  
Canonical Epc-N  
PHD 2.3e-11  
Bromodomain 2.7e-31  
AT hook  
PWWP 3e-15

>TnigroviridisCAG01066 (misannotation?)  
MKKKARHNRTPTLKR<sup>DSSPIKPSPNRETLTYAQARIVELEVDGRVHRLSIYDKLDVITDDDPTAQEILE</sup>  
CNSNKENREKPPQVLVRSVRLKINRQ<sup>KNAALEASHGGGSGTHGCPALLQPKFRTVEYNLPVVPKRPA</sup>  
<sup>FYKYTERLAEELDEEVEYDMDEEDYAWMELVNEKRRSE</sup>GIGQVSH<sup>NLFEFLMDRFEKESHSLTRGQSDLO</sup>  
AMVDEDAVCCICMDGDGADSNVILFCDSCNIAV<sup>HQECYGVPIIPEGQWLCRHCLQVRLLPQQRSLKKT</sup>  
<sup>DGRWGHVACALWVPEVGFSDTVFIEPIDGVRNIPPARWKLTCYL</sup>CREKGAGACIQ<sup>CDKVN</sup>CY<sup>TAFHVSCA</sup>  
<sup>QKVGLYMKMEPVKEVLES</sup>GSAT<sup>FSVKKTAYCCSHTPGTWSHRPLNVYEEPHPKHAACHRRGAKRGRARPK</sup>  
SWGKRSKRVEPEAE<sup>AETPPTS</sup>GP<sup>SITASSFEAILNQAVQKKRSFVERVLSYVWQKRQSRNNVPLIRRL</sup>  
<sup>QANPQPIRDSQTSRAETNOALKEQLKEWHRLRHDLERARLLLELIRKREKLKREQVKQOQSVLEFQ</sup>LTPF  
NVLLRAVLSQ<sup>LQEKDKYSIFAQPVSTKEVVEDFNLIIDNCMLYNAKDTFFYKAAQRMQDHGGAILRRARK</sup>  
EANRIGFDLPSGLHLAQS<sup>PRPEPAAPFSWEDVDRLLSPAYRQATPLEEQKELLEKLDLSAAMKHSPSRS</sup>  
KRLKLLKKSILEVRSEL<sup>SLRKSFLPASPPRLAAPPQSEDQSPARPLSQPRPPPEEPLAPPVLELLTSLSQ</sup>  
IDVPGECPTAPSPDVDAHTST<sup>SALPDAPDGGAPASPLLDGELYAEASATCSQRANTLFRKSKSTSPQKAP</sup>  
RSQ<sup>EAGAVPPQPLGAKTFLSVVIPRLETLLLPGKRRRSIDSEQEEAEPVKRLGTGRVANGLAAEEELSAA</sup>  
PRPLEPRRRCASESSISSGSGLLPNTSAAFL<sup>TKSGKGRSPARRSTVDDKNALRTCVEHRET</sup>PGSGESK  
GLPVT<sup>TAPRRQKTAPRLRWAELPRPPVDVLRAGEQRRFRFAEKLFLVLF</sup>IGSRHSW

Canonical Epc-N  
PHD 1.2e-11  
Bromodomain 4.2e-10 (misannotation)

>CfamiliarisXP\_538883 (misannotation?)

MATIQQCQCSHLFLVLRCKVVTTCCHYTKIHFPWTIAQGAGGRRSQAPRWGRRRRRAPGMSFTRKKGFYRQD  
VNKTAWELPKTYVSPHVGSGAYGAVCCAIDKRSGEKVAIKKLSRPFQSEIFAKRAYRELQLLKHMQHEN  
VIGLLDVFTPASSLRSFHDQDLTGSPhSVCTNLPRQLCRVPGVGLDLGALPGRKQSGSGPHLWLVGQP  
RVHGGFEHWGDVDRSDLGDLAGGKKQGAALGAEKACYLVMPFMQTDLQKIMGMEFSEDKIQYLVIYQMLKG  
LKVHGGREGGWYIHSAGVVHRVSALSAVVLRGSSTLKGFSSTDLKPGNLAVNEDCELKILDFGLARHADA  
EMTGYVVTRWYRAPEVILSWMHYNQTDLDQLSQILKVTGVPGAEEFVQKLNDKAAKSYIQALPQSPKKDFS  
QLFPCASPOGESWGCPSGHLPPSPWAALPGLGCEVLSVAAATDLEKMLELDVDKRLTASQALAHFFEP  
FRDPEEETEASQPFNDSLEHEKLTVDWKRLLIFENSLLGFWEEKMLGGQYTCVWVLLLNKRKRGDQWAL  
ASLPRWFAGASFLCVRVGLRVSRLVRSPPPFRRGGDVISLLSPRKGQDSSGRGAPLKGQGPWQGRSLSP  
SLVGYGGHRLIAETPRPSETWWGLSPWFGAMRKP RRKSRQNAEGRRSPSPYSLKCSPTRETLTYAQQR  
IVEVDIDGRLHRISIIDPLKIIITEDELTAQDITECNSNKENSEQPQFPGKSKKPSKGGKKESSKHGSG  
TSFHLPPQPSFRMVDSGSQPEAPPLPAAYYRYIEKPPEDLDAEVEYDMDEEDLAWLDMVNEKRRVDGHSVV  
SADTFELLVDRLEKESYLESRSSGAQQSLIDEDAFCCVCLDDECHNSNVILFCDICNLAVHQECYGVPI  
PEGQWLCRCCLOSPSRPVDCVLCPNKGGAFKQTS DGHWAHVCAIWIPEVCFANTVFLEPIEGIDNIPPA  
RWKLTICYICKQKGLGAAIQCHKVNCYTAFHVTCAQRAGLFMKI EPMRETS LNGTIFTVRKTAYCEAHSP  
GAATTRRKGDSPGSLSEAGDEEGLKEGCGEEEEKEVEEEEEDEGQGGVGGPLKGLPKKNKMLKQKIKK  
EPEEVS RDTPSTVPMVTPQIPSYRLNKICSGLSFQRKNQFIQRLHNYWLLKRQARNGVPLIRRLHSHLQ  
SQRNAEQREQDEKTS AVKEELKYWQKLRHDLERARLLIELIRKREKLKREQVKIQQAAMELELMPFNVL  
RTTLDLLQEKDPAHIFAEPVNLSEVPDYLEFISKPMDFSTMRKLESHLYRTLEEFEEEDFNLI VTNCKMY  
NAKDTIFHRAAVRLRDLGGAILRHARRQAENIGYDPERGTHLPESP KLEDFYRFSWEDVDNILIPENRAH  
LSPEVQLKELLEKLDLVSAMRSSGARTRRVRLRREINALRQKLAQPPPPPPQPPSLNKT VSNGLPAEAQ  
GDVTVLEQAPQEEPEDDGRDDSKLPPPTLEPTGPA PSLSEQDSPDPPTLKPINDSKPPSRFLKPRKV  
EEDELLEKSPLQIGSEPLQRLSDNGINRVSLMAPDVPAGTPLSGVGRRTSVLFFKAKNGVKLQ RSPDRA  
LENGEDHGAVGSPASPASIEDEQHSRKRPRSRSCSESEGERSPRQEEETGVTNGFGKHTESGSDSECSLG  
LSGGLAFEACSGLTPPKRSRGKPALSRVPFLEGVNGSDSYSSGRSLLMPFEDRGDLEPLELVWAKCRGY  
PSYPALI IDPKMPREGLLHNGVPIPVPLDVLKLGEOQKQAEAGEKFLVLVFFDNKRTWQWLPRDKVPLG  
VEDTVDKLMLEGRKTSIRKSVQVAYDRAMIHLSRVRGPHSFVTSSYL

Pkinase 9.2e-35  
PHD 4.3e-08  
Bromodomain 2.2e-35  
PWWP 2.9e-27

>MmusculusXP\_196171  
MGRGGDARPLRSEGGDEAGKSARKGAARKGPPAPAILFLPGLPSWFPVAMRKPRRKSQNAEGRRSPS  
PYSLKCSPTRETLTYAQQRIVEVDIDGRLHRISIIDPLKIIITEDELTAQDITECNSNKENSEQPQFPAK  
SKKPSKGRKESCSKHASGTSFHLPPQPSFRVVDTSQPEAPPLPAAYYRYIEKPPEDLDAEVEYDMDEE  
DIAWLDMVNEKRRADGHSSVSADTFELLVDRLEKESYLESRSSGAQQSLIDEDAFCCVCLDDECHNSNV  
LFCDICNLAVHQECYGVPIPEGQWLCRCCLOSPSRPVDCVLCPNKGGAFKQTS DGHWAHVCAIWIPEV  
CFANTVFLEPIEGIDNIPPARWKLTICYICKQKGLGAAIQCHKVNCYTAFHVTCAQRAGLFMKI EPMRETS  
LNGTFTFTVRKTAYCEAHSPSVAVARRKGDSPRSLSEGVS KKGMSLKQKIKKEPEEAGREAPSITLPMVT  
VPQIPSYRLNKICSGLSFQRKTQFMQRLHNYWLLKRQARNGVPLIRRLHSHLQSQRNAEQREQDEKTS AV  
KEELKYWQKLRHDLERARLLIELIRKREKLKREQVKVQQAAMELELMPFTVLLRTTLDLLQEKDSAHIFA  
EPVSLSEVPDYLEFISKPMDFSTMRKLESHLYHTLEEFEEEDFNLI VTNCKMYNAKDTIFHRAAVRLRDL  
GGAILRHARRQAENIGYDPERGTHLPESPRLEDFYRFSWEDVDNILIPENRAHLSPEAQLKELLEKLDL  
STMRSSGARTRRVRLRREINALRQKLAQPPPPQLLSLNKTVPNGELPAGSRGDTAVLEQAQEEPEEEG  
DRDSSKLPAPPTLEPTGPA PSLSEQESPDPPTLKPISDSKPSRFLKSRKVEDEELLEKSALQLGSEPL  
QCLSDNGIDRLSLTNPDSHPDTP LGTVGRRTSVLFFKAKNGVKLQ RGPDTLENGEDHGPEDDPASPAS  
TEDEHYSRKRPRSRSCSDSEGERSPQEEETGVTNGFGKHTESGSDSECSLGLSGGLAFEAGSGLTPPKR  
SRGKPALSRVPFLEGVNGSDHSGSGRSLLMPFEDHG DLEPLELVWAKCRGYPSYPALI IDPKMPREGLL  
HNGVPIPVPLDVLKLGEOQKQAEAGERLFLVLVFFDNKRTW

Canonical Epc-N  
PHD 4.3e-08  
Bromodomain 2e-33  
PWWP 1.1e-09

>RnorvegicusXP\_228039

MNFENIGVRRQVGDQVQLCRIKGLSSSFVAMRKPRRKSQRNAEGRSPSPYSLKCSPTRETLTYAQAQ  
RIVEVDMGRLHRISIIDPLKIIITEDELTAQDITECNSNKENSEQPFPAKSKKPSSKGGKESCSKHAP  
GTSFHLQPQSFVRVDTGSQPEAPPLPAAYRYIEKPPEDLDAEVEYDMDEEDMAWLDMVNEKRRADGHSS  
VSADTFELLVDRLEKESYLESRSSGAQQSLIDEDAFCCVCLDDECHNSNVILFCDICNLAVHQECYGVPI  
IPEGQWLCRCLQSPSRPVDCVLCPNKGGAFKQTSDBGHAWVVCIAIWIPEVCFANTVFLEPIEGIDSIPP  
ARWKLTCYICKQKGLGAAIQCHKVNCYTAFHVTCARAGLFMKIEPMRETSLNGTIFTVRKTAYCEAHSP  
SVATARRKGDSPRSLSEVGDEDGLKEGGGEEQEEGEEGEGQEGGGVGSPLKGVSKKSKMTSKQKIKKEL  
EEAGRETPSITVPMVTVPQIPSYSNVLPVQSDINPGDSVSDVVAFTVTLSDIVDRPEPPTDLSTPLCL  
YPRLNKICSGLSFQRKNQFMQRLHNYWLLKRQARNGVPLIRRLHSHLQSQRNAEQREHDEKTSAVKEELK  
YWQKLRHDLERARLLIELIRKREKLKREQVKVQQAAMELELMPFTVLLRRTTLDLLQEKDPAHIFAEPVSL  
SEVPDYLEFISKPMDFSTMRRKLESHLYHTLEEFEEFNLIIVTNCMKYNAKDTIFHRAAVRLRDLGGAIL  
RHARRQAENIGYDPERGTHLPESPKLEDFYRFSWEDVDNIIIPENRAHLSPEAQLKELLEKLDLVSAMRS  
SGARTRRVRMLRREINALRQKLAQPPPPQLLSLTKTVPNGELPAGSRGDAAGLEQTLQEEPEDEGDRGLA  
LRRGKALGSDGVEGLSSYNIWDAITNIYRSTQNKIYCQSRHQLLHWFVFLGTQMLQNDSDQLPAPPTLEP  
TGPAPSLSEQESPPDPPTLKPISDSKPSGRLPKPRKVDDEELLGDSALQLGSEPLQCLLSDNGADRLPLT  
NPDSPPGTPLGNVGRRTSVLFFKAKNGVKLQRGPDGTEENGEDAPASPASMEEEHC SRKRPRSQCSDSE  
GERSPQQEEETAKVSDLPLALVQQSELWDCGVGNSTDKQRKPPGQVTNGFGKHTESGSDSECSLGLSGG  
LAFEAGSGLTPPKRSRGKPALSRVPFLEGVNGSDSHSGSRLMPPFEDRGDLEPLELVWAKCRGYPSYP  
ALIIDPKMPREGLLHNGVPIPVPLDVLRLGEQKQAEAGERLFLVLFVDNKRTWQWLPDRKVLPLGVEDT  
VDKLMLEGRKTSIRKSVQVAYDRAMIHLSRVRGSHSFTVSSYL

Canonical Epc-N

PHD 4.3e-08

Bromodomain 1.4e-33

PWWP 4e-27

>GgallusXP\_419262 (misannotation?)

MRKPRRRSRQKLEGRSPSAYSLSKCSPTRETLTYAQAQRIVEVDIDGRLHRISIIDPLKIIITEDELTAQD  
ITECNSNKENSEQPLFSPKSKKTPSKGKKREACSKHTSGTSLHLPQPNFRVDSFKQSDAPPLPTAYRY  
IEKPPEDLDAEVEYDMDEEDLAWLEMVNEKRRDDGYGMVSAETFELLVDRLEKESYLESRNNGTQHSIID  
EDAFCCVCMDECHNSNVILFCDICNLAVHQECYGVPIIPEGQWLCRCLQSPSRPVDCVLCPNKGGAFK  
QTSDBGHAWVVCIAIWIPEVCFANTVFLEPIEGINNIIPARWKLTCYICKQKMGAAIQCHKVNCYTAFHV  
TCAQSRAGLFMKIEPMRETSINGTFTTVRKTAYCESHSPPGTVKKRYSAATSERQEGIVKEEREEEGSSGP  
PKGSLKKNQVKLQKIKKEPESEGTDRSSMPMMTVAQIPSYRLNKICSGISLQKRNQFMQRLHNYWLLKR  
QARNGVPLIRRLHSHLQSQRNAEQKEQDEKTSAVKEELKYWQKLRHDLERARLLIELIRKREKLKREQVK  
VQQAAMELWLTFFNVLLRRTTLDLLQEKDAAQIFAEPVNLNEVPDYLEFISNPMDFSTMRRKLESHLYRTL  
DEFEEFNLIIVTNCMRYNAKDTIFHRAAVRLRDLGGAILRHVRRQAESIGFDTDVGIHLPEPKTEDFYR  
FSWEDVDNIIIPENRAHLSLEAQLKELLEKLDIVSPMRSSGARTRRMRLRREINSVRQKLAQQQSRMA  
NGEVLWEEELDKTSREEDEEGDDAKLPHPTLEPTGPAPSFSELESLODPPKLP IHD SKSLNQLQKKV  
MSDRDFDFDKALQRESQAFQRLSDSSNLGLTLPPADTLMSPFFSGVGRRTSVLFFKAKNGVKLQKGLDC  
SLENGEDHEQSEQLSPSCANGERQTRKRPQSRNYSSESDGEKSPRQAGQRGVTNGFAKHAESGSDSEHSPS  
LGSGLVFETCSGLMPPKRSRGKPALSRVPFLEGVNGSDSYSSSGRTLLMSFESQTELEPLELVWAKCRGY  
PSYPALVGTQRREQLQICFLH

PHD 3.2e-07

Bromodomain 3.2e-35

AT hook

PWWP 8.8e-09 (misannotation)

>AmelliferaXP\_395348

MVKEIDEYEQQLGAEALPNSYIRFMERSGEELDGEVEYDLDEEDTAWLSIVNERRLASGLNPPLEPDTF  
ELLMRLEKESYFQQQSNNGGGIAADEDAVCCICMDGECQNSNAILFCDMCNLAVHQDCYAVDCVLCPNR  
GGAFKQTDPRPATWAHVVCALWIPEVRFANTVFLEPIDSIIESIPAARWRLTCCVCKRRGSGACIQCHKSN  
YAAFHVTCARAGLQAGLQMRMTVQPTNGEPMVQKTAHYCEAHTPSDYQPSTNPADARRRAIANKSSAPVI  
SIPTIPPERIKEIASLAEGLPKRSQLIQRLIAYWTLKRQYRNGVPLLRRLQSSHPQSRPPPLGENSSPPP  
DSELRGELYRQLKYWQCLRQDLERARLLCELVRKREKLKKELFKVKEKCLWFELRPLESILRSLEAIKM  
KDINDVFGQPVNTKEVPDYLEIVSHPMDLSTMQTKIERQEYDTIGAFEADFNLMVNNCLAYNRKDTMFYR  
AGIKMKEQGGILIEQARKDYPELDPGENEQTVSKSRKRDRNRRSRGEIELQSGEKEIGGGVNRRTAVLF

TRKARARASRSNQMFLEDDKKKQSDSFKIYSKEIIANNGLEALQLVWAKCRGYPWYPALIIDPNTPRGT  
VHKGVPPIAPPDDVLALAVNYKEPVFLVLFDDTKRTWQWLPGEKLEKLGVSQELDEAKLIESRKPADRKA  
VKKAYQEALHYRKQTHNTSLNTASTS

Canonical Epc-N

PHD 0.0015

Bromodomain 1.5e-30

PWWP 7.8e-20

## Epc-N SUBFAMILY IV

>GgallusXP\_416870

MTGLNFELTTSTVPGHQRTWCQEERDHYSRSRGGLRVQVGNAAKTWRSCLLIIGVACPTAKATQATTSSG  
GKGEVPGVLLDSVVYRSCSEKARSVFLATILSSYQKTRRTFAAATI STNHCAGSSVLRSESDTALVAAD  
LEKYWRSAPPRVSRQTAVLVAKPARAVGLEGPRGQNCVSSATSCTFSLGRCLSAVQKLRVYAKPSPPRS  
VLSSFLLLRRTTVFARTFPQPAESKSSGSGQHPRFGMPDVVSLSAEARAGGSPPTPPPPPLRRGAAREAA  
GGLCGKGVKWTILGFYSEFVDSQDLHGQFGTGVKTEKLLNIECRRRSPFVGCRLDCPPEGRGGVPGSHP  
ATPVPPQRPVACLSCRPAACVLRGTIRAPYLGCCFLCCSWYVCLDIGSSSFASFLLSNAVFPSSSTQMYMCV  
TPQEGIAGRNMPLPMLLIAQSELVNQKEQLDALALMSSASYLEELCKADNKPHQQLHLCRRTLFDVNVF  
VALGRLLCKTHCCGSPVGLCPHFSALNTAESSSAGEGKDPAWGPEQPRACLCIGLIYIHPMVFSEIDSV  
QIHVDFRFGAKGHLGEIRDVRAAGVERGSSPETVLKARVRFESTAKAPLLTFHESENYLLILLQKSGCN  
PALLLRGALTLCVCRMKRHRHLSTSDSSDNESPSTSFSSCAKYRSKSKTPANEQKPAEVEFRKDLISAMK  
LPDSSHVNPDEYYVFADTWKQEWKGVQVPASPETIPQPSLRVVAEKVKEVLYTRPRKYIHCSSQEPTEP  
GYINILELAESVCRYDLDDMDIFWLQELNEELTEMGCGPLDENTMEKTI EVLERHCHE MNHAIETEEGL  
GIEYDEDVI CDVCRSPDSEDGNDMVFCDKCNICVHQACYGILKVPESWLCRTCVLG IHPQCLLCPKRGG  
AMKATRTGTKWAHVSCALWIPEVSIACPERMEPI TKVSHIPSRWALVCSLCKLKTGACIQCSVKSCITA  
FHVTCAFEHSLEMKTI LDDGDEVKFKSYCLKHSSKNQNSLPDVDEHPKSI SDQKQTESEKTS LRAQKLR  
LEEFYSLVKVEDVAELGLPKLAVDFIYNYWKLKRKSNFNKPLFPKPEDEENGLVQPKEDSIHTRRMF  
MHLRQDLERVRNLCYMVSRREKLLKLSHSHKVEQVFNLOVQLINQEI AAGHTLPSALENTLFYPPPRITLK  
LKMPKSALGDCKNNSLKPGRNPLSPDNNSTVYSKRSVPMSKEPFEI KAKYSRYQHDTRSNGLLVTTGGIG  
KPRGEAKDSGLVQVPEFHRGQPSGKPLALQAALHGQSS IGNRLQODGSRLVAKSNGLMGRGTGDVSRQDS  
SSQTPFEQESVLT AHLASQSGFRKSTIEHFSRSFKEATNSLVRTTEDLRCCEKPTRRLAAKERLWSQOTL  
EGAPYQDNDGYCPDLELSDSEAESDENKEQMLRRLRSSSERESPSKDFGRECHNRNKNMI SHGSVQR

Canonical Epc-N  
PHD 1.7e-16

>CfamiliarisXP\_540950

MGMQDQVWRSHGGVHGHGAVGVQSGAGAFVGHGHGQGRSRSSGCVVTEQWVRGHGAVGARSRGGGQSRGSG  
CAVTGREGGVWGAQSRGVRGACGVRRRHGAGAESWRRVVAEGLSVPGRQCQDKHRGKRGKSPGPARQTGTE  
QTGMEQLVPGPGARVSRSAQACRWRLPADAVTVVEDDRGKPAALAHPRNATAYKNAYVSAPWDPLCSH  
SEGLWHQPASLTGFWQOFPACQRTCPSGGEEAADVSAGPRHRRSHAWALLASGLESFALFSGLIQGNTRV  
VFTVAGAGVSVVQVQALIQLOLELLKPLSRCPVEDWPHGGRSSIGVFAGCFCLSTTWSQNSRSHRRGSC  
SRHEDGKPSERAQLTDAQVLRKYNLGPALMPGSELPCVALRPWWPEDEAPLAGSAVLLSCPSRREQPC  
AAFWSPLRPDEGRGAPSGQGYFEFCGSVFRERRGEHPRGKYQQPSFELGAHRISGEETEVSLLLSDML  
PACGVEVFRDITAMKLDHSYQLNPDEYYVLADPWRQEWKGVQVPVSPGTIPQPVARVVSEKSLMFI  
RPKKYIVSPGSEPPELGYVDIRTLADSVCRYDLNDMDAAWLELTNEEFKEMGMPELDEYTMERVLEEFEQ  
RCYDNMNHAIETEEGLGIEYDEDVVCVQSPDGEDGNEMVFCDKCNICVHQACYGILKVPESWLCRTC  
ALGVQPKCLLCPKKGAMKPTRSGTKVHVSCALWIPEVSI GSPEKMEPI TKVSHIPSSRWALVCSL  
KFGASIQVLQRPFAEAVIRTQVGYLIRPGFHHVWGPEWGGNGFVKTACVFRVHTTHRQVSRILRFGLK  
LKRKGTLRYLWERMEETLFKNLRVKAQALGPCRVCVPTYPVSTCRTAAEGSGSSCLPWHRRLRIEFLP  
FLSTPVLPRHRQRDVGACEGSLGFRNICLLSQPEENPEEGRLAPLHSPVEVPPPFVPGPPEEGSLGF  
SAAVLAAGARPPAGPRLSGDWLQWPQGASSRSPROAEGAVVSGRAQPPCDHRKRPFVLRPGRGQRP  
PGPEAFPRAPGGAAWPSAPRGGLSIPPPGLASLLLFPFPLPGVSYSLSSDLSSPRLGGNCSVKNCRTA  
FHVTCAFDRGLEMKTI LAENDEVKFKSYCPKHSSHRKPEESLGEAAQENGASECSPRNPLEPFASLEQN  
QEEAHRVSVRKQLQLEDEFYTFVNLLDVARALRLEEVVDFLYQYWKLKRKVNFNKPLITPKKDEEDN  
LAKREQDVLFRRLQLFTHLRQDLERVMIDTDTLAAADGTSSTADSGSGSPLPAAGILGAGCLPSSGASCP  
RSFWQRLANWGGVSEQPTFSSLVLGSGDPGLSGLTHPAPKGTQGMSQGMSQGMSQGMSQGMSQGM  
SGPSRGADGTVPNEGSVQKGRASGAPFLHGVRNLTVMVTRREKIKRSVCKVQEQIFNLYTKLLEQERS  
GAGPSLSPAFVAYCKQPARKAAGCRSPASRAAAVQAGPVEGRSVALVHTEETQKCGFVKVDPKHSTGSG  
GNSLPKQPDLCGRREGTVVPEGFLSFEKTFAEARLVSAQOKNGVMPDSDRRDHRLHCDLSRGDFKDRP  
CKQSHKPLRPTDPSQRHLSDPRAAAASPGTGQSAPGSRKEIVPKCNGSLIRVNYNQTAVKVPTTPASPVK  
NWGGFRIPKKGERQQGEAHDGACHQSDYPYLGGRVPAKERAKNKLKSDHENDGYVPDVEMSDSESEA  
SEKKCIHASSTISRRTDIIRRSILAS

PHD 7e-16

>TrubripesCAE30495

MKRLRSSSSSDSSDNESPSTSFCCSSNKGKPGTPASNPKKPAEVFRKDLISAMKLPDSSHVPPEDYLL  
ADTWRQEWKGVQVLASPDITPEPSARVIAERPTEVLYSHQRKYIQSSNQESTEPGFVNIRELAEAMCRY  
DLDDVDLYWLNMLNKELERMGEEPIDELTMERTIEALERHCHDNIINHAIETVEGLGIEYDEDVICDVCRS  
PDSEEGNDMVFCDKCNICVHQACYGIVKVPFGNWLRCRTCVLGITPQCLLCPKKGAMKATRAATKWAHVS  
CALWIPEVSIACPERMEPITKVSHIPPSRWSLICSLCKLKTGACIQCSVKNCCTPFHVTCFAFEHNLELKT  
ILDEGDEVKFKSYCLKHSQGKTGEAGLSPARSKPPAEAVKVLRAQRLQELEEDFCALVQPGEVSQELGL  
PERPADFIQYWKLRKANFNKALLPPKEEEENVVLPQEDSIHTRMRMFHMLRQDLERVRNLCYMVSR  
EKLKLLQSKAQEQMFLHVALVNQELSAGLQPSCLMESMLFHPAPRITLKLKMPKSSSVGNPNPAFKSGN  
GPLCPDNSGNVADQPGGGLGQGKQLHENGRGEERPNNQGLSSSSNSASAVRFTGKPLALHAALHGHSSK  
GRRKPDQERPRVSKSNGLYEKIVSQKNKSEPPCDQYASKKGVSKSSFHKSAMEHFGRPFKDATISLVRT  
TEDRLASDKLSRDTAADRLLWTKPVPEHKVKSSRSYQDSGYCPDLELSDSEPEAKGRRGQOVERAHLEP  
PRKGISHGKKTLSRHAMQR

Canonical Epc-N

PHD 3.5e-15

>TnigroviridisCAG01391

MSWTGVRRAVPPALARTGAGYRSRTRRDAGPLPGGDCGLQPLQEGTSLCPLAPMFGSSPARSAKGAASA  
SLAPTWFSGTGSLLYFNPLLFSLKSKILKGLVAAVSSRCCSPASPPALSAPPDGSFAFRTGALTLAGAAVA  
PGWSRMDKRLRSSSSSDSDSNESPSTSFCCSSNKGKPGTPASNPKRPAEVSSRLQDVCGEVEDVVTASE  
KHTLQKKRGRSQFCFLKVFVRKDLISAMKLPDSSHVPPEDYLLADTWRQEWERGVQVPASPDITPEPSA  
RRSTSSAGARSPQNRG SANIRGLAEAMCRYDLDDVDLYWLHALNTELERMGEEPVDELTMERTMEALERH  
CHDNIINHAIETVEGLGIEYDEDVICDVCRSPDSEEGNDMVFCDKCNICVHQVAQSPAEEP DVARETNQLL  
SLLSRSPGLLRHCGALWELAVQDLRARHQPVPALSOEGRRHGHTRRHQMGARQLCSVDTRGPIQAA  
GVLVGRRSTGDTFSPLQVSIACPERMEPITKVSHIPPSRWSLICSLCKLKTGACIQCSVKNCCTPFHVTC  
AFEHSLELKTILDEGDEVKFKSYCLKHSQGRAGEATLSPARSKPPAQAEKVGLRAQRLQELEEDFYTLVQ  
LGEVSRELGLSERPADFIQYWKLRKRSNFNKALLPPKEEEENVVLPQEDSIHTRMRMFHMLRQDLERV  
RNL CYMVSRRREKLKLLQSKAQEQMFDLHVTLNQLSAAAASMSVCGSSAPSPGELGQLPMDSWMAHLPC  
ALWDVPLSHLAIPGSHNAITYCLDMNERSPVDLTQPDMLQKLDKYMKPLIRPFVYKWAITQEYPMKQQLD  
CGVRYCDLRIAHRPNDSSDLYFYHGVYTTLTVEVGVYKHSPPSCRVAVFAMVTAFCHEHQMLQTSVLMEM  
REWLDAHPEVLIILFSHFGLSDELHALLTTIRNIFCSKLCPKTRWANKCKAETLIEAFEHRKKQDRP  
EGLFVTGINLTVDLKYICTHPTESLKDLMSTYSVLLGWVREQTPGSRVGSVNI IAGDFVTERHFAPT  
TLNEKLLKRSS

Canonical Epc-N

PHD 3.2e-09 (misannotated?)

>DrerioCAE30492

MKRLRTPSSSDSSDNESPSTSFSSNKYGSKPGTPASAOQKPAEVFRKDLISAMKLPDSSHIISSDYLLA  
DTWKQEWKGVQVLASPDITPQPSVRIITEKPKVLFVSKPRKYIQCWSQDSTETGYVNIKELAEAMCRYD  
LDDMDLYWLQQLNAELGMMGDGVVDELTMERVMEALERQCHENMNHAIETEEGLGIEYDEDVICDVCRSP  
DSEEGNDMVFCDKCNICVHQACYGIVKVPDGNWLRCRTCVLGITPQCLLCPKKGAMKATRAGTKWAHVS  
ALWIPEVSIACPERMEPITKVSHIPPSRWSLICSLCKLKTGACIQCSVKNCCTIPFHVTCFAFEHSLEMKTI  
LDEGDEVKFKSYCLKHSKPKAGEPGLSPARHKPPTETDKLSLRAQKLQELEEEFYTYVHPPEEVAHDLSLP  
LHLLDFIQYWKMKRKSFNKALLPPKEDEENLLLPQEDSIHTRMRMFHMLRQDLERVRNLCYMVSRRE  
KLKLSQSKAQEQIFNLHVKLVNQLSAGLPVSSSIENLLFHPPPRTITLKLKMPKVQLGNGKSSSKSGN  
LCPDNSCNLYDTSEGGIGQGKQLHLGRQRIEERINGILPASIYIRRDGGTPPLAVKQSGKPLALHAALH  
GQSSNGKTKNEAEKSRQIKSNGILDKPIQRTSCLAASEKDRSEISGKSQSSGFHKTSLEHFSRSLKE  
ATVSLVRTEDLRTFEKNSRKSSGFSPKPLSTERPQGGGRASQESDGYCPDAELSDSEPEAKGKCRQGGRTQ  
NQRGDYVKSASRAKHSYGSRTSVQR

Canonical Epc-N

PHD 4.3e-17

>RnorvegicusXP\_227074

MSWVTTPKDPRRLRGILACGKRDPDPLPGDLSAWAQLFPVCTLAVTQHQGPPRVPPFRDGEELVRLEQLATPF  
SRLVCLISLNCGPLPHRTAFISNLRAGDSRSGSPRGLCGPDSGGAACSPRRPSPCAAGCLLSPGEIMK  
RGRLPSSSESDSDNGSLSTTWSQHSRSQHRSTCSRHEDRKPSEVFRTDLITAMKLHDSYQLNPDEYYVL

ADPWRQEWKGVQVPVSPGTIPQPVARVVSEKSLMFI RPKKYIASSGSEPPELGYVDIRTLADSVCRYD  
LNDMDAAWLELTNEEFKEMGMPELDEYTMERVLEEFQRCYDNMNHAIETEEGLGIEYDEDVVCDCQSP  
DGEDGNEMVFCDKCNICVHQACYGILKVPEGSWLCRTCALGVQPKCLLCPKKGAMKPTRSGTKWVHVSC  
ALWIPEVSIQSPEKMEPITKVSHIPSSRWALVCSLCKNEKFGASIQCSVKNCRTAFHVTCAFDRGLEMKTI  
LAENDEVKFKSYCPKHSSSHKPEESLGEAAQENGATECSPOSPLFPFASLEQNREEAHRVSVRKQKLOQ  
LEDEFYTFVNLDDVARALRLPEEVVDFLYQYWKLRKINFNKPLITPKKDEEDNLAKREQDVLFRRLQLF  
THLRQDLERVRNLTVMVTRREKIKRSVCKVQEQIFSLYAKLLEQGVSGVPSSCSSLENMLLFNSPSVGP  
NVPKIEDLKWHSAFFRQMGMTNLVHSLKSHKRDALQNSSGTEGKTLKQPLSGRREGSGVPESLLSFE  
KTFAEARLISSAQKNGVVTDPHGKRRDNRFHCDLVKGDLDKDSFKQSHKPLRSTDTDSQRHLDNTRAATS  
PGVGQSAPGTRKEIVPKCNGSLVKVPTTPASPVKSWGFRIPKKGERRQQGEAHDGACHQHSDCSHLGIS  
RAPAKERSKRLRTDSENDGYAPDGEMSDSESEASEKKCIHASSTISRRTDIIRRSILAS

Canonical Epc-N  
PHD 7e-16

>GgallusXP\_420467  
MGADNRSPVRGTGKHQHQGTTRRNGSPGGYRGSCYTSVQTEPPELLCWTQKDVALLVGRQQPRGSRRRCR  
FIRAPAVIRYGRALPNSRVPRFPRLKTAEPGRGCREPGPRHKPCAEPARRAPGERSGRESKAAHAYKPEAF  
TKRCRNARCDVRRRGFSPQRDVGARLCAQQQRGFPSCGTHSLAAAFELCFAAAENVQRFSLCFPLPAVHP  
AAGPSGAVRADSSMEAGRNRGGCRGWSRGAALSGSGLSEGRSWPGNMLPLSNGTPRAFSPNLGFRAFVYL  
RYFTSVFMGQCLDVCSEEARIKDLDFVPLQLSVCLKKRERKEFGIAVPCSFCLSVVSNQSAVEAAVCVC  
SRWSDGGTAWLAASAGKHSCEGSGKWFCEGACRSECFVGTPrLLSSYAVAI SCWGLSSLQISHKAWKRV  
FFLESIIASILSVCKLRMHVAEQGKPAPSDCTSPPAVCGCLLFPGEIMKRRRLPSSSENSDDNGSDFFT  
YVHFQGASVLHGAAQTALAVRSVPYTNPTQTIAMRECEVPLLGVEVPEYGHKAAKSNHTLHFPPALLLV  
PLERVLCSLMEALGLSTWSQHSRSHRRSSCSRQEDRKPSEMTANPEVGKDAAGFRAKREVKLSIIQH  
HVSSVGGTGPLIEEVTQVIVSVFAPFATLFSAMKLNFCPAVGWVFRDLDLITAMKLHDSFQLNPDEYYVLA  
DPWRQEWKGVQVPVSPGTIPEPVARIVSETKAVTFRTRPKYISSSGTKPELGYVDIRTLADSVCRYDL  
SDVDVAWLQLANEEFKEMGMPELDEYTMERVIEEFQRCYDNMNHAIETEEGLGIEYDEDVVCDCQSPD  
GEDGNEMVFCDKCNICVHQRCLLAFALLFSGVNKFVVEEWTVFFCIAAGHDFCQRACYGILKVPEGSWLC  
RTCALGVQPKCLLCPKKGAMKPTRSGTKWVHVSCALWIPEVSIQSPEKMEPITKVSHIPSSRWALICS  
LCNEKVGASIQVDSGALGVSNGGKEEHQKNNLLACSVKNCRTAFHVTCAFDRGLEMKTI LAENDEVKFK  
SYCPKHSSTKRADDETFSDHLCQENGNGIQDSSLPAHIDPFHSMQNEEAHRVSLRKQKLOQLEDEFYTF  
YVESRLVAKALQLPEELVGFYQYWKLRKANFNKPLITPKKDEEDNLAKREQDVLFRRLQLFTHLRQDL  
ERVRNLTVMVTRREKIKRSVCKVQEQIFNIIYAKOLEQERSVSGVPSSFSSTMENAVLNFNSPSLGNPQIED  
LKWHSAFFRQMGTSLSLTHSLKSHKRDGVSNSGSSKMLRQPSQRGDGATPGSLLNFDKSAETRIVS  
AQKNGIVMPDHRKRRDNLQCEVIKTELKEKTKHNHKLPRPTELSQRQSENKRAVNHSSGRSAPGTRRD  
IVPKCNGGLVKINSNQTEVKVPTTPTSPVKNWGGFRIPKKGERRQQGESQEETCRQNSGYRYLGVGRVSP  
KDRASKPKPDSSENDGYIPDAEMSDSESEVAEKKCRQORLSPNSTISRRTDIIRRSILAS

Canonical Epc-N  
PHD 2.2e-07

>DrerioCAE30491  
MKRSRVPSTSESDNGSNSTSWQSNSKHKRQSGKRPSEVFRDLDLITAMKLHDSHQLNPEDYYELADPW  
RQEWKGVQVPVSPESIPQCAVRTVAEKSTAPLFIKPKLIRSESSMLGYVGIQTLADGMCRYDLNEED  
VAWLQITNEEFKMGMQPLDELTMERVMEEFERRCYDNM SHAMETEEGLGIEYDEDVVCDCQSPDGEDG  
NEMVFCDKCNICVHQACYGILKVPEGSWLCRTCALGIFPKCHLCPKKGAMKPTRSGTKWVHVSCALWIP  
EVSIGNPEKMEPITNVSHIPSNRWALICCLCKEKTGACIQCSAKSCRVAFHVTCGLHCGLKMNTILTEAD  
EVKFKFSFCPKHSGLDWNEEEGDDRPVKVPTREDRSRNRGIDFSASSQTRLSQNPETRLSERKLRVQOL  
EDEFYRFVAADVAEHLQLPLEMVDILFYQYWKLRKRVNFNQPLIMPKKEEDSLARREQEVLLRRLRFT  
HLRQDLERVRNLTVMVSRREKIKRTLRCVQEQIFHHHVRLLEQGRVTGVSSTRLEAMFYFRTPPVPA  
SPQPLKGHCQNSTLSSSEKGSNSYRSSKHIEADKPAKMLMDGVPSSGDSVRSETVMSASSRRSEGRTRS  
GESHRKEEESERPLEDRRKS KLWDQVSIKDKLRHAKSMEDTLSSETELDTMDDRLLLSHTNANSVATAP  
NMYSGSPRKTNASHQGLVPNGTSGRHLKNWGSFRIPKRSERTSAGRQTERQEADNTADQNSSLKTFSTS  
PSSPQIRTRLRTGSENRRHLEESDLGQSEQKRCRHTQRLSPMTRRYGSDVIQRGVLAS

Canonical Epc-N  
PHD 7e-16



>HsapiensBAC86931

MKRGRLPSSSESDDDNGSLSTTWSQNSRSQHRRSSCSRHEDRKPSEVFRDITAMKLNHDSYQLNPDEYY  
VLADPWRQEWKGVQVPVSPGTIPQPVARPKKYIVSSGSEPPELGYVDIRTLADSVCRYDLNDMDAAWLE  
LTNEEFKEMGMPELDEYTMERVLEEFQRCYDNMNHAIETEEGLGIEYDEDVVCQSPDGEDGNEMVF  
CDKCNICVHQACYGILKVPESWLCRTCALGVQPKCLLCPKKGAMKPTRSGTKWVHVSALWIPEVSI  
SPEKMEPITKVSHIPSSRWALVCSLCNEKFGASIQCSVKNCRTAFHVTCAFDRGLEMKTILAENDEVKFK  
SYCPKHSSHRKPEESLGKGAQAQENGAPECSRNPLEPFASLEQNREEAHRVSVRKQKLOQLEDEFYTFVN  
LLDVARALRLEPEVVDFLYQYWKLKRKVNFNKPLITPKKDEEDNLAKREQDVLFRRLQLFTHLRQDLERV  
RNLTYMVTREKIKRSVCKVQEQIFNLYTKLLEQERVSGVPSSSSSSLENMLLFNSPSVGPDAKIEDL  
KWHSAFFRKQMGTSLVHSLKPKHRDPLQNSPGSEGKTLKQPDLCGRREGMVVPEFGLGKTFAEARL  
ISAQKNGVMPDHGKRRDNRFHCDLIKGDLDKDSFKQSHKPLRSTDVSRHLDNTRAATSPGVGQSAPG  
TRKEIVPKCNGSLIKVNYNQTAVKVPTTASPVKNWGGFRIPKKGERRQQGEAHDGACHQHSYDYPYLG  
LGRVPAKERAKSKLSDNENDGYVPDVEMSDSESEASEKCCIHTSSTISRRTDIIRRSILAS

Canonical Epc-N

PHD 7e-16

>MmusculusCAE30496

MKRGRLPSSSESDDDNGSLSTTWSQHRSRSHRSSTCSRPEDRKPSEVFRDITAMKLNHDSYQLNPDDY  
YVLADPWRQEWKGVQVPVSPGTIPQPVARVSEKSLMFIIRPKKYIASSGSEPPALGYVDIRTLADSV  
RYDLNDMDAAWLEVTNEEFKEMGMPELDEYTMERVLEEFQRCYDNMNHAIETEEGLGIEYDEDVVCQ  
QSPDGEDGNEMVFCDKCNICVHQACYGILKVPESWLCRTCALGVQPKCLLCPKKGAMKPTRSGTKWVH  
VSCALWIPEVSIKSPKMEPITKVSHIPSSRWALVCSLCNEKFGASIQCSVKNCRTAFHVTCAFDRGLE  
MKTILAENDEVKFKSYCPKHSSHRKPEEGLGEGAAQENGAPESSPQSPLEPYGSLEPNREEAHRVSVRKQ  
KLOQLEDEFYTFVNLLDVARALRLEPEVVDFLYQYWKLKRKINFNKPLITPKKDEEDNLAKREQDVLFR  
RLQLFTHLRQDLERVNRNLTYMVTREKIKRSVCKVQEQIFTQYTKLLEQEKVSGVPSSSSALENMLFFNS  
PSVGNAPKIEDLKWHSAFFRKQMGTSLVHPLKSHKRDVQNSSGTEGKTSHKQPGLCGRREGLEVSESL  
LSLEKTFAEARLLSSAQKNGVVTPDHGKRRDNRFHCDLVKGDLDKDSFKQSHKPLRSTDTSQRHLDNTR  
AATSPGVGQSAPGTRKEIVPKCNGSLVKVPITPASPVKSWGGFRIPKKGERRQQGEAHDGACHQSDCSH  
LGVSRAPAKERAKSRLRADSENDGYAPDGEMSDSESEASEKCCIHASSTISRRTDIIRRSILAS

Canonical Epc-N

PHD 7e-16

>HsapiensCAE30500

MKRGRLPSSSESDDDNGSLSTTWSQNSRSQHRRSSCSRHEDRKPSEVFRDITAMKLNHDSYQLNPDEYY  
VLADPWRQEWKGVQVPVSPGTIPQPVARVSEKSLMFIIRPKKYIVSSGSEPPELGYVDIRTLADSVCR  
YDLNDMDAAWLELTNEEFKEMGMPELDEYTMERVLEEFQRCYDNMNHAIETEEGLGIEYDEDVVCQ  
SPDGEDGNEMVFCDKCNICVHQACYGILKVPESWLCRTCALGVQPKCLLCPKKGAMKPTRSGTKWVH  
SCALWIPEVSIKSPKMEPITKVSHIPSSRWALVCSLCNEKFGASIQCSVKNCRTAFHVTCAFDRGLE  
MKTILAENDEVKFKSYCPKHSSHRKPEESLGKGAQAQENGAPECSRNPLEPFASLEQNREEAHRVSVR  
KQKLOQLEDEFYTFVNLLDVARALRLEPEVVDFLYQYWKLKRKVNFNKPLITPKKDEEDNLAKREQD  
VLFRRLQLFTHLRQDLERVNRNLTYMVTREKIKRSVCKVQEQIFNLYTKLLEQERVSGVPSSSSSS  
LENMLLFNSPSVGPDAKIEDLKWHSAFFRKQMGTSLVHSLKPKHRDPLQNSPGSEGKTLKQPDLCGR  
REGMVVPEFGLGKTFAEARLISAQKNGVMPDHGKRRDNRFHCDLIKGDLDKDSFKQSHKPLRSTDV  
SRHLDNTRAATSPGVGQSAPGTRKEIVPKCNGSLIKVNYNQTAVKVPTTASPVKNWGGFRIPKKG  
ERRQQGEAHDGACHQHSYDYPYLGRLGRVPAKERAKSKLSDNENDGYVPDVEMSDSESEASEKCCI  
HTSSTISRRTDIIRRSILAS

Canonical Epc-N

PHD 7e-16

>MmusculusBAC33688

MKRGRLPSSSESDDDNGSLSTTWSQHRSRSHRSSTCSRPEDRKPSEVFRDITAMKLNHDSYQLNPDDY  
YVLADPWRQEWKGVQVPVSPGTIPQPVARVSEKSLMFIIRPKKYIASSGSEPPALGYVDIRTLADSV  
CRYDLNDMDAAWLEVTNEEFKEMGMPELDEYTMERVLEEFQRCYDNMNHAIETEEGLGIEYDEDVVC  
QSPDGEDGNEMVFCDKCNICVHQACYGILKVPESWLCRTCALGVQPKCLLCPKKGAMKPTRSGTKWVH

VSCALWIPEVSIQSPEKMEPIITKVSHIPSSRWALVCSLCNEKFGASIQCSVKNCRATAFHVTCAFDRGLEM  
KTILAENDEVKFKSYCPKHSSHRKPEEGLGEGAAQENGAPESSPQSPLEPYGSLEPNREEAHRVSVRKQK  
LQQLEDEFYTFVNLDDVARALRLPEEVVDFLYQYWKLKRKINFNKPLITPKKDEEDNLAKREQDVLFRRL  
QLFTHLRQDLERVRNLTVMVTRREKIKRSVCKVQEQIFQYTKLLEQEKVSGVPSSCSSALENMLFFNSP  
SVGPNAPKIEDLKWHSFAFRKQMGTSLVHPLKSKHRDAVQNSSGTEGKTSHKQPGLCGRREGLEVSESL  
LSLEKTFAEARLLSSAQKNGVVTPDHGKRRDNRFHCDLVKGDLDKDSFKQSHKPLRSTDTQSQRHLDNTR  
AATSPGVGQSAPGTRKEIVPKCNGSLVKVPIITPASPVKSWGGRIPKKGROOQGEAHDGACHQHSDCSH  
LGVSRAPAKERAKSRLRADSENDGYAPDGEMSDSESEASEKKCIHASSTISRRTDIIRRSILAS

Canonical Epc-N  
PHD 7e-16

>AnidulansEAA57618  
MAPYTSPKRSPGGPLKNGSKTPLLDSGNSETPVADNLGPIIKKRKYVPGGPGGGRYIEIEVRETPKQP  
KPKPKPKQPKPSPVKRTSSSISRTRHQLREAESSAQPAQLPPPPPPVHAPTTTPPSTRLRREKSQTRGRFG  
SSTAALALQQGDGYKPREERGWEFFHPELDIDAQFPVFPVSAEVDPRPLSAQLASILSPNGLDKTNENDP  
VAELIRAHANGTVQTPIKRRPGRPPRRPEAILQSLGVFTPQPKVPPPPGPNPREKLTLPKPSFRLKDPFT  
FYDQPGVGQONVYVDRTMASVGYQESDLFIRHRRLLIRMPEGAQEDDLIDIGNPLLGEDEVNAAVGRVEYDM  
DEQDEKWELEDYNAKRREDQYEPKPAVFEITMTKIEKEWHSLEKRIKPNPKPPQTPQRPRSSSAAAVNGE  
TTGPGEDQDTKCAICDDGDCENANAIVFCDDGLAVHQECYGVPIPEGQWLCRKCQLIGRGSNCFPCP  
NIEGAFKQTTTSKWSHLLCAIWIPEVSIQNSLMPEITDVEKVPVRSRWKLCQYICRQKMGASIQCSNKNK  
FVAFHVTCARRAQLYLKMKSGHGNLAVMDSHLLKAFCDKHVPEWRREHGTDAATADAIEYYRTTMQGRR  
WGDSQAAALSLEPAHPLGGPEDEDGQRTHTPRITLTVGGNKRKRNAPRTIWKLPSGAPVIPQVLLNSV  
VASLQRFQVQRKQYAEADACKYWTLKREARRGAALLKRLQLETFSSMEMTRRDYAAMGATGSKRLQRR  
IEFGDRLYRDLRLRMLCDEVKKREREKLDKDAEMLRNIVDTVYFPIFPLLPWIFEKAQVLDKSGFFRRGL  
LAIRTKLEQRYYPVSSFSASHLASIFTSEIGVQAGDTAELQMQISGRAPELSLEQREKRKLAKRIKAI  
QPALEDAIRKESELTRQPFQELKDLVMLGDVSSGRGSEIDSAERPGEAEFEKSELPNGDSTDSTNMDPN  
STAKMKSTEEVLESTETNTPGAEPKLTGSAQAQAATENTPVDVPMSDASTTQPPNEAQAAITPELAE  
PGEAPVIQQQNTQTPQVPLSPPALETQDHHPLARGGIQWYMQPFDPMGTTIHEERWTGREVMRGLSEELS  
ELDEEELNDLVDEDELEENATGTGVFANRAPDSSRGEQGVKVRTRRRRWRGFK

Canonical Epc-N  
PHD 1.2e-12

>TnigroviridisCAG03789  
MKRSRHHSSSESDNGSSSTCWSQHSTQPRRSAGQKPVFVRTDLITAMKVHDSYQLNPEDYYVLADPWR  
QEWKGVQVPVSPQSIQPVVRTLAEKEKEVMFVRPKKLIRTSGAELGYVDIRTLAEGMCRYDLNEQDV  
AWLQIANQFAEMALPLDEITMERVMEEFERRCHENMTHAMETEGLGIEYDEDVVCVQSPDGEDNN  
EMVFCDKCNICVHQACYGIQKVPKGSWLCRICALGILPKCQLCPKKGGAMEADPEWNOVSIQNPKEMPEI  
TNVSQIPSNRWALVCCCKEKTGACIQCSAKNCRATAFHVTCGLHASLRMKTILTEDDEVKFKSYCPKHSG  
LDGAQVRDSGEEESARDKKRRTGRTRGEEEEEEEEEEEEEEEEEAAPASLASQVSSRTSGAADALSSH  
QQEKRVNLRKLEAMEEEFYRFVQAEVARHLKLSPEPADFLYQYWKLRRKANFNQPLLPKDEEDSL  
ARREQEVLRCRLQLFTHLRQDLERVRNLTVMVTRREKMKRSMWKVQEQIFQHQVHLLDHELLTGDPSAKD  
LENLVFLGWFFSSPDRSRSSCAPSALKPKQGPLKVEKRKLSARKGLDSPEAPRRDGP SRDGRGAQNGGSG  
SESEKSRREEIPSELREPEASQEEAKLCRLSRKAPRKEAPGPTQEDLVGQEPEDQEERRKKRSDMM  
DRFRFKHLEKSVSIRLVDIRNSDIGGAARGPFRSPVLLSDVAVGNRANGWLKPKAAGGAAAAGHLRSWG  
KFRIIPKRNEKTAEEPPLLPNASSQPRTLRRTGAENAGYSPTAGEGEVEPCLKRCHSHQLRGASALGRRY  
GSDIIRRGVLAS

Canonical Epc-N  
PHD 3.6e-15

>PtroglyodytesXP\_517435  
MKRGRLPSSSESDDNGSLSTTWSQNSRSQHRSSCSRHEDRKPSEVVRTDLITAMKLVHDSYQLNPDEYY  
VLADPWRQEWKGVQVPVSPGTIPQPVARVESLTLTIRPKKYIVSSGSEPPELGYVDIRTLADSVCRY  
DLNDMDAAWLELTNEEFKEMGPELDEYTMERVLEEFQRCYDNMNHAIETEEGLGIEYDEDVVCVQCS  
PDGEDGNEMVFCDKCNICVHQACYGILKVPKGSWLCRICALGVQPKLLCPKKGAMKPTRSGTKVHVVS  
CALWIPEVSIQSPEKMEPIITKVSHIPSSRWALVCSLCNEKFGASIQCSVKNCRATAFHVTCAFDRGLEMKT

ILAENDEVKFKSYCPKHSSHRKPEESLKGGAQENGAPECSPRNPLEPFASLEQNREEAHRVSVRKQKLO  
QLEDEFYTFVNLLDVARALRLPEEVVDFLYQYWKLRKRVNFKPLITPKKDEEDNLAKREQDVLFRRLQL  
FTHLRQDLERVMIDTDTL

Canonical Epc-N  
PHD 7e-16

>MgriseaEAA57521

MPSAPSTPQRPTPARRRGRPRSTSAARSSRVAVADTEPPPKRRYIPGGPGGGGRFVDENGNEVPRPAG  
SSSAPRPRAAGTPTGKPRRSLAAGSTAVYPRRERSTRMRTATS RFEPDDEQFSSAAAITSAVIQSEGY  
KPREERGWEFHPNLDIEATFMVFQSEDVDGTARPRPSTPKYAVPAASADTSTPKGASALKTQEDEEATK  
DAALVPPEGSQNSTTTTPMTRRSRGRPSRDPLGVYGMRGADSTTPKVPKVLP IHNQTPKERL DLKQPSYRK  
TDRI SLFESKTFGQARYVEKSMNVGYQESDQYLRPERMLIKATDGNIEEDLEQLSAIAKVDGATTSPAS  
NALGRVEYDMDEQDDMWLEKYNERRKEASLDTITREIFEIAITRIEKEWHALEKRI PKPNPKPPQTHRPR  
SSSAAAVNGETQAGEEQDSKCAICDDGDCENTNAIVFCDCGLAVHQECYGVVPIPEGQWLCRKCQLIGR  
GVPTCIFCPNTDGAFKQTNSSKWAHLLCSMWIPEVSLGNHTFMPEVMDVEKVPKTRWKLTCYLCNQRMGA  
CIQCGNKACYQAFHVTCGRRARLYLKMKN SQALAVLDGNMVLKAFCDKHCPADYTKENVAQATRDAKK  
FYKMMKGRWLWATSQDSAAELAATHRQALHDQPADDLQATGDNVAAADKKRGQVQK CWWR LPSGAPVIP  
QSVLTIVEGAMQRFPF SKRKDFVAEACRYWTLKREARRGAALLKRLQLQMETFSSMELTRRDF SAMQSG  
KARLERRIEFANMLIKDLEQLKTLSD EIVKRELDKLEAAELEQDFVDTVYFPIYKLLLPVIDKAFALDKS  
VFQEGLNGLQNRLLKAVHYTTTLAFAHDLCEVIHVGINSSTIKPDVVELSDRPEEGEALDVSPSKQSGYV  
EADRKRLGKRILKAVQPQLETALHAEADIANKPF EKLVKELEGMLEASLELRQASITVSQDENVAPEHN  
GEVAMVDAPVDVAGQIIVADHETRTHHVDAQADVDRMQIDVAVDDAGNIEVDTSGVENAVVEVNGCASS  
TSSVAGQENQPTDLTKLDVHLTNGTPKQSGTTPADSNYMHQPQLPSGPQPGPLTPPQSNGLGAGGASGPA  
DVLTDGGLPWYLSFHV DGTSA AEDKWAGRDAVRSLSEDLTMDDEEELNGLEFDVEDSTITASPVNASS  
GPMLSTRKRSISSVRHRKGVRTSARRR

Canonical Epc-N  
PHD 1.8e-12

>HsapiensCAE30502

MKRHRPVSSSDSSDESPSTFTSGSMYRIKSKIPNEHKKPAEVFRKDLISAMKLPDSSHINPDSYLLFAD  
TWKEWEKGVQVPASPDTVPQPSLR IIAEKVKDVL FIRPRKYIHCSSPDTTEPGYINIMELAASVCRYDL  
DDMDIFWLQELNEDLAEMGCGPV DENLMEKTVEVLERHCHENMNHAIETEEGLGIEYDEDVICDVC RSPD  
SEEGNDMVFCDKCNVCVHQACYGILKVPEGSWLCRSCVLGIYPQCVLCPKKGALKT TKTGTKWAHVSCA  
LWIPEVSIACPERMEPITKISHIPSRWALVCNLCKLKTGACIQCSIKSCITAFHVTCAFEHGLEMKTIL  
DEGDEVKFKSYCLKHSQNRQKLGEAEYPHHRAKEQSQA KSEKTS LRAQKLELEEEFYSLVRVEDVAEEL  
GMPTLAVDFIYNYWKLRKSNFNKPLFPKDEENGLVQPKESIHTMRMFMHLRQDLERVRNLCYMIS  
RREK LKLSHNKIQEQIFGLQVQLLQ EIDAGLPLTNALENSLFYPPPRITLKLKMPKSTPEDHRNSSTET  
DQQPHSPDSSSSVHSIRNMQVPQESLEMRTKSYPRYPLESKNNRLLASLSHSRSEAKESSPAWRTPSSEC  
YHGQSLGKPLVLQAALHGQSSIGNGK SQPNSKFAKSNGLGSGWGNVTQKDSSEMFCQEPVFSPHLVS  
QGSFRKSTVEHFSRSFKETTNRWVKNTE DLQCYVKPTKNMSPKEQFWGRQVLRRSAGRAPYQENDGYCPD  
LELSDSEAESDGNKEKVRVRK DSSDRENPPHDSRRDCHGKSKTHPLSHSSMQR

Canonical Epc-N  
PHD 8.7e-17

>NcrassaEAA26920

MAPVPSTPRRRPQSRPKARSRAGGSATTSRGRHASGAPATEPPLKRRYVPGGPGGGGRFIDEDGVETP  
AEPGASASRI RTSAAARASPSVFPKRERSTRIRTA VNRDKLDDMQYSSAAAVVA AVVQSEGYKPREERGWE  
EFHPNLDIEGTFMIFQADEVDGILREAPHTPAVQQPQO HQLGQDHGATTPTKSA INNMVST DAPNAAT  
PSGQDRPLL AGSVTDTPSRRRPLRPTRESSSIYANRPLDFGITPKTPKVLP IHNQTPKERL DLKQPSYRK  
TDRIALFESKTFGQARYVDKSMNVGYQESDNFIRPDRKLIKATDANVEEDIDPSTMTQANS DSAHNSAG  
AVGRVEYDMDEQDDMWLETLNRRRKDSNLDTITREIFEITITKIEKEWHALEKRI PKPNPKPPQTHRPRS  
SSAAAVNGEPQTGEEQDSKCAICDDGDCENTNAIVFCDCGLAVHQECYGVVPIPEGQWLCRKCQLIGR  
VPTCIFCPNTDGAFKQTNSSKWAHLLCAMWIPEVSLGNHTFMPEVMEVEKVPKNRWKLV CYICNQKMGAC  
IQCSNKNCFQAFHVTCARRSRLYLKMKN SQALAVLEGLPLKAYCDKHCPQDYAKENDVVQATKDAKRF  
YKRAMKGRIWADSQASALQLAATHRHAITEHPPDESQMTGAKVSAVLGETKNGHPGKPIWKLPSGAPIIP

QAVYDLVESALARFPILKRKDFVAEACRYWTLKREARRGAALLKRLQLQMETFSMELTRRNFAAMGPSG  
KTRLARRIEFARTLLKDLLEHLKALSEEIVQREASKLEAAEMERDFVDSYFPVYEMLI PALQKAIQSDRD  
VFAKGLSELQDKMEKRYTTTTLQFTHDLCQVISAEINSAMNPHAGLDQIVEPSYASPTKPGTNAEVKCK  
QMGKRILRQVQPYLEAALQAEADICSKPYDTLHQELEGMLDASLEVRQPTITVSSHGDVAAEDVEMADAP  
EEGGQIIVADESDGEADGDGEDGDGKADANVDSNGEPDEMNVDTSQOKAGVGSIEVNTSEVDAAPESNN  
TLSTSQSVAGEEKENHKEDESOQLQLPDGPTKDSGTPPSLPGEGPDRANVPQLSHPOQSGPLTPPQSNGS  
FGRDPTTNILTEGGVPTYLHGFIIEGTSVIEEQWPGREAVRSLSEELTDMDEALKDLEFDVDEADTITA  
TSPNHVPVPLGTAEIAVEGGASSSKDVAAAVVTAAVANATATLSAPPVTRRRERANPAMARKGVRSSARR  
R

Canonical Epc-N  
PHD 1.8e-12

>CfamiliarisXP\_538010  
MKRHRTLSSSDSSDECPSTSTFTSSSMYRSKSKIPHEHKKPAEVFRKDLISAMKLPDSSHISPD SYVVFAD  
TWKEEWEKGVQVPVSPDTPVQPSLRVVAEKVKDVLFRMRPKYIHCSSSETTEPGYINIMELAASVCRYDL  
DDMDIFWLQELNEDLAEMGYGPDENLMEKTVEVLERHCHENMNHAIETEEGLGIEYDEDVICDVC RSPD  
SEEGNDMVFCDKCNICVHQACYGILKVPEGSWLCRSCVLGIHPQCLLCPKGGAMKTTTRTGTKWAHVSCA  
LWIPEVSIACPERMEPI TKVSHIPPSRWALVCNLCKLKTGACIQCSVKSCITAFHVTCAFEHSLEMKTIL  
DEGDEVKFKSYCLKHSQNRQKLGAEYPLHRAAEQSOAKNEKTSLRAQKLELEEEFYSLVRVEDVAEEL  
GLPTLAVDFIYNYWKLKRKSNFNKPLFPKQDEENGLVQPKESIHTRMRMFHMLRQDLERVRNLCY MIS  
RREKLLKLSQNKLEQIFGLQVQLANQEMAAGLPLTSALENSLFNPPPRITLKLKMPKSAPEDCQNSSTEP  
DHGPPSPASSSPVHGVRSMQVPEPLEMRTKSYPRHSLESKSNRLLASLSHPRSETKDPSPAWRTPSPEF  
YHGQSLGKPLVLQAALHGQSSIGNGKSQSTSKLAKSNGLEGNWGDVTDKSSSETFCQDESILSSH LAS  
QGTFRKSTVEQFSRSFKETTNRWPRTMEDLQCYMKPTKNINPKEQLWGKQLVKRSAGRASYQENDGYCPD  
LELSDSEAESDGNKEKVRVRRVSSDRENPSHDSRRDCHGKSKTHPVSHSSMQR

Canonical Epc-N  
PHD 2.3e-16

>XlaevisAAH72750  
MKRVCLPSSSESDSDNGSLSTSWSQHSRSLSPFRHEDRKPSEVFRDITAMKLDHNSQNLNPEDEYVVLAD  
PWRQEWKGVQVPVNFPIPETIARVIAEKDKVVTFRTRPKYIHSSGSEPPEVGYVDIQT LADAVCRYDL  
NEMDVAWLQLINEEFKEMGMQQLDEYTMEOVLEEFKCKYDKMNHAIETEEGLGIEYDEDVICDVC QSPD  
GEDGNEMVFCDKCNICVHQACYGILKVPEGSWLCRTCALGVQPKCLLCPKGGAMKPTRSGTKWVHVSCA  
LWIPEVSIIGSPEKMEPI TKVSHIPSNRWALLCSLCNEKVGACIQCSIKNCRTAFHVTCAFDHGLEMKTIL  
TQDEDEVKFKSYCPKHGSTKKPEDSHFCRSASDGKDTCEASPTFLGGLRVLEASQONVKHGSQRKLLQQL  
EDDFYSFVDVHDISQALKIPLDVTEYIYQYWKLRKANFNEPLITPKKDEEDNLAKKEQDVLIRRLQ LFT  
HLRQDLERVRNLTVMVTRREKMKRSVCRVQEQIFNLYTKISEQEKDLGFPLENGLLNTQPSNP DAPKIE  
DLKWHSAFFRKRRLGSSLRCSMKDSSHKSRERIIGKSLDTEILLTDRKKEGQTSDVSPLEKTVAKIKPVQ  
QKNGGSFPEHRKRDRSRTQGDTKFDSKEKPLRQHRPAKHTEPPERPAEKRALSQCGGKSATASSNKQ  
CSSSLPRYSGLIKIHENRPSVKVPTSPIKNWGGFRIPKKGKQVPGSMETCQPNLNCQFLGQVSKKGR T  
KEKVKLDNDNDGYTPDAEMSDSESEPTDKCRLQRLTSSSSLSRGEYETDFIRRSILAS

Canonical Epc-N  
PHD 7e-16

>MmusculusCAE30499  
MKRHRPVSSSESDDECPSTSTFTSSSMYRKKSKNPKEQKKSAAEVFRKDLISAMKIPDSSHVNPD SYVLF TD  
TWKEEWEKGVQVPANPDSVPTPSLRIISEKVKEMLFVRPRKYIRCSSPESAE PGYINTLEQAASTCRYDL  
DDMDIFWLQELNEDLGEMGYGPIDETLMEKTIEVLERHCHENMNHAIETVEGLGIEYDEDVICDVC RSPD  
SEEGNDMVFCDKCNV CVHQACYGILKIPEGSWLCRSCVLGIYPQCVLCPKGGAMKTTTRTGTKWAHVSCA  
LWIPEVSIACPERMEPVTKISHIPPSRWALVCNLCKLKTGACIQCSVKSCITAFHVTCAFEHGLE MKTIL  
DEGDEVKFKSFCLKHSQNKPKLGDAEYHHHRVAEQSOAKSEKTS LRAQKLELEEEFYTLVQVEDVAKEM  
ELSAFTVDFIYNYWKLKRKSNFNKPLIPPKEEENGLVQPKESIHTRMRMFHMLRQDLERVRNLCY MIS  
RREKLLKLSHTKVQEQIFGLQVQLINEEITEGLSLTNALENSLFYPPPRITLKLKMPKSTSEDCKDSSTET  
EHQLSSPGSSSPGHSKRSPQMPPEPLDMNVKIYPRYPLESKSNCLQTSRSHSRCE TKSSSPTPRAPSAEF  
YHGQSLGKPLALQAALHGQVSI GNGKNQPNRSVSSSNGLEGNWGSNITQKVNSSSEVCYDQESMLSSH LPS

PGNIRKSSMEHFSRSFKEATNTWVKPTEDLOYCVKPTKNVSSKEQLWGRQLLRRPTGRASYOETDGYCPD  
LEPSDSEAEGEGSKETPRVKRESSDRENPSHDSARECHGKTKTHPHSHSSMQR

Canonical Epc-N  
PHD 5.1e-17

>CintestinalisCAE30490  
MTSERKYSRRLPSVSCDEVNISGLGSSLNSHTPSRSRRCSEKHDLEANIDENRTDGDNNNNNRSASAYL  
SKLLDCKDLLNDLDASPSPGNPELEANGFTYNSLKPSTPSTSNMRSAIQRSTLSQKRQSRIPNRHKPAE  
IFRKDLISAMKIPDTSQLLNEEYWIMQDPWRIEWEKGVQVPVNAKSVPTKNIQIVPKETLGDFRMPKML  
KSSPDIGDRDMIDLNVLADSTCRYDLDEMDVAWLKIINHERKMMGLATLDEFSMEQIMEELETQCHDNMQ  
LAIKTKEGLGIEYDEDDVCDVCRIPDCEEGNEMVFCDCGNLCVHQACYGILKVPVGSWLCKPCALGIRGS  
AMCILCNKKGAMKSTRSGNKWAHVSCALWIPEITTIADPDRMEPITKVSHPVSSRWALLCSICKDRVGAC  
IQCSVRHCVTAYHVTCAIEDKLDMIADCGVSPLEGQEDAVIFRSYCKKHSTNRKESDGEDEQTEERIRGM  
RHRRIMELEQEYFTLVKYQAVANALSIPSQTARDVMEYWKLKRAANFNRLITPKHEEGTALAEAAETNL  
QRRLRMFTHLRQDLERVRNLCYMIG

Canonical Epc-N  
PHD 2.1e-10

>GzeaeEAA77830  
MAPASPTPRRPVTGRRRGRPPGSTNAARAARAAALAAASATEPPPKRRRYAPAGSRFIAGGAGGGGRYVT  
SDILATPNTAGPSTSSRSRAAAREAINGPSPLMPRRRERGARTRAAGNEDLEEMQWGSAAAMATAVKQAE  
DYKPREERSWEDFHPNLDIEATFLVLRSEQVDGIPQEQPDMSTVPMLTTPLDLTRTPSRQPNPASTGNT  
NPQGRSDSNAADAPNETPLRRRPRRTRDVSFYSSRPLDLMTTPKTPKILPIQNQTPKEKLDLKLPSYRK  
TNRIELFESKTFGQARYVDKAMSNVGYQESDHYMRPDQSLIKSSDLHAEDDADLTDATASEEPVSHRRIG  
RVEYDMDEQDDMWLERLNVRRKEDELEEITREIFEITMTKIEKEWHALEKRIPKPNKPPQTHRPRSSSA  
AAVNGEPQGGEEPDSRCAICDDGDCENTNAIVFCDCGNLAVHQECYGVFFIPEGQWLCRKCMLCGRGVPT  
CIFCPNTDGAFAKQTNSSKWSHLLCAMWIPEVSLGNHTFMPEVMDVEKVPKSRWKLTCYICRQRMGACIQ  
GNKNCYQAFHVTCAARRSRLFLKMKTSQALAVLDGGMVLKAFCDKHCPPDYAQEHNIHQATKAACKFYKR  
TMRNRIWADNTVAANNIAAQHRDALAEQPSEETQLAGNKSSISGDKKKGQPPKNLWKMPGAPVIPQVVF  
EIVEASIQRFPRKRKDFLSEACRYWTLKRQKRRGAALLKRLQLQMESFSSMELTRRDFAMGPSGKARL  
TRRIEFAEDLVKELEQLRNLASQVVEREQIKVDAGELEQEFVDECYFPVAKLLDPAIDRAISLDKDLFSN  
GLDKLQTRINTRFYVTVMFAVDLCKVISDGVATTPEPKLSTDATQHESNDASPAKHTFSDIRERRKLGK  
RILKAVQPFLEAALRVESEISQKPFEGLOKELEDTIDKSVESRRPLTATSQDKSTDPSEANDTIMVDAE  
LQITVKADSTEGGDAMDITSDDGNIDVSTNIDVDTSEIAKAEAGEKQESLPNTVQSSDTPPGTDGYVSKP  
QTAQSGPPTPPQSNGLGLDPSDPLTDGGILWYLKGLDPKGTSLVLEEQWAGRDAVRTLSEDLTDLDEAL  
KGLGMDVDNAVASAAVEADEKEEVKAAAEPVGGKTRASKAKKRRASTRRR

AT hook  
Canonical Epc-N  
PHD 1.6e-14

>DpsedoobscuraEAL30007  
MSQRGKRGNGHHHQSHHPPPOQORQKDVPEQPPPTKRRKGRVVPVIPPSSNSKNEVEQELDIGGGGSGLLG  
AASSSSSITKSKSTKLAKSSSKSKSQGASTSSSQARSVADIKMSSIYNRSSTEAPAELYRKDLISAMKL  
PDSEPLANYEYLVVADQWKQEWKGVQVPVNPDSLPEPCVYVLEPEIVSPAHDFFKLPKNRYLRITKDEHY  
SPELHCLTNVVALAENTCAYDIDPIDEAWLRLYNSDRAQCGAFHINETQFERVIEELEVRCWEQIQVILK  
QEEGLGIEFDENVIDVCRSPDSEANEMVFCDCNLCVHQACYGITAIPSGQWLCRTCSMGITPDCVLC  
PNKAGAMKSNKSGKHWAHVSCALWIPEVSIQVDRMEPITKISSIPQSRWSLVCVLCRKRKRVGSCIQCSKH  
SMSKGGKENAGGASGGGSASVTSSMHKANKYATGTGDGANEGSSACGKTGEDQRRRKNHRKNDMTSEERN  
QARAQRLQEVAAEFDKHVNINDISCHLFDVDDDAIVAIYNYWKLKRKSRHNRELIPKSEDEVEMIARKQE  
QQDLENHKLVVHLRQDLERVRNLCYMVSRREKLSRSLFKLREQVFKQLGVLDETRLDKQQKQDDKQRP  
ALDMDAVIYANDGPTLYDRFYSSAGGQTVPAQYQNLQYVLEQLMGKLSQSGKQGRGRASQSPNKRKQVAKA  
SPTKKNLNGAITSRTSSPEKPAAMGKVPSTSTSTATATTAQKVRGAPPKPLAGRRASKSGAATGTSTHN  
KTQSQSQSHSHIRSSASSHTSSGSSSSGSSSPNGTSSSDSSSASDSGSESGSSSAASGISRRKSTTGSP  
LKKQSYARSVEQORQORRQSEAAAAGASAASPNRSATSSSEDEDEQORRRQEPERERDGRGRGAIYNK  
TVPNRTQPTKSKQSTQADAGSGAGTGAAVETGAKRKLSTNTRGLAQMHKDAEESLSSDESEELLPLKNER

QREAAALSSGLAASGPTTGGRRKMGQHIYSDSESSSSSNEKEQEEITAVESNVSDSQNOQTIRTKAAMKEFV  
PGTAATTTQSASSATAAASKFTKSTKEAKEGASSCKANSNAKLPYPADLLVVPQRQAACKASENMRSTNL  
AATLQPDAAADMREPESHATTIAKNKLDKSGSKQATEADKFGGGDKVRSKEQSKSTAKSAGEAIVERGK  
RGRPPKVPREPPAPSTSSSTEKEKPPPPAEAKSTAPAAKPTAAKTSFAVSYVPQRQAACKAAEQLKSSKPL  
QDTTFSTANESAEKEPAATTTTGMTTLGVATSSPAKPSRRTSLKEAPNTPKESSANRRKSKEEAAAAA  
KTTTPIKRRIAAPNLSSSSSGDSDSSSSSSSSSGSSSSSGSGSDSDSDSQASDAEKPRQAGKEPAPSAAAP  
CSTVSSNVPKRSRPLTARTRONSTNKS PKRVPQKSVATVDIQDDAQSAKTHSHRRQSSPDEGSKQV  
QSEQVTKRATRGSKSRPPSPVVKSSPEKQ TARRKSRADESPKKIPNLEHEINQRKAASGKATSALDKMLD  
KKQQQINNSTPASPPRKS LTPPTPPPARSPLPEKLQREPEPEVVEPEVETEIEPATEAGELPMDIDEELT  
TAPTHTQLSANASKLADIIDDERPPAAPLPASPTPTPTSNDLSDAGSDLSECRSRWRSSRRRRRSHE  
PDEEHTHTQHLLNEMEMARELEERKNELLANASKYSASTSSPAVTVI PPDPEIIELDNSANSNGDQ  
QQQQQQQPLPQQLMVHSPSSEVASTIQQQQPPPSHOTLIDQLPVEHMAPVLTGPAAPCVLEPIVDTIL  
EMEDSKFANNFASLASVLNPPNPGQMSLLGSSLDRGEQISEEDSIQATRNLLEKLRKTKRKAQDDCCSK  
EAVDLLPPTPAIPSVFPFHNAADPEDIHAQKDCLYGNSSGPNVASLTIKDSPMTANS GSYANSLTNT  
NATPTNATMGNNLGASGGYQVNFNGSQAPPLSCFLEKSPHQKGGCPLSNNGGAVPGATPDFVDLAAA  
KNSLGSYQAGAPVTAQSGAGSNSNKLSDYDENTRMQSPFGRMQRWENDLIAARRSSSPSSVSESNDQPP  
ATVAARNISQLEGCKTFFNSYASNGGGGSAVNPTAPYSHAPLVNGIDGMSMFSAAPQQQTTPTHQTP  
NSQFNGGIYQPLAVMMHTQSTTTTESTPSLYGNGG VGVVPGVGVGAVPTTLPLAPPPQAPQYSGTPYTT  
PSLGMLPVQQQPVVPPVQVSTTPNHQFALASPVDGKIPAYPAHPAHPAHPAHPAHPAHPAQLLSSCVEAA  
VVSMMPTTPVAVAAKESPNKRSSANS GSAAKKQPNKSPQLPQKSPGKSPRQPVQPPPTPPAPAPAVA  
LPPSKDPLTHTTIQKPRQAPRGSGGSGAPGRGRGRGRGAGAASGMALPLPPMSDYGSNTHIVN  
NLVGTPEFENYDDDDITGPGVENLQSLRDRRRSFELRTTRGQPKTPAPTAATTTNPLLHPVLPGPVDMR  
TYNLGFEAPHSTASQEAQNLLGAFDSGTADQTLSEFDEEDERQFQSALRATGTGTSPSKHPAVSAA  
APAPAPAANSQPPANLLLHSTEANQMAPSVAATGGATHLMEGSLVEASLEATSEEVSIDS DTTIMNSKTS  
ICDARNQLKLIKISPLAYSGEHYGAMANSLSLSLSSSTLVQSSAVQTTVSTSTVVSASSVSGNSRR  
MRKKELLSLYVVQKDNLDSSCGLPAASDNLPLGPDFLRKSEEEEDVSTGNGNGSKRFKKNSSSRELRA  
LDANSVLVEDQQLAGASGGGAGTASGDGRRRSACSSGNSNDNNGKTGAATSAGKRRGRSKTLESSEDDHQ  
TPKLIKIRGLSGSEAVASAGISNAGDSKSYSEMTRRACPPKKRLTSNYSTPTLEEIKRDSMNYRKKVM  
QDFDKGEENKQDSSGLPLDGEALMPQPPSKRPKSKPKKDKKEKQRQKQKQILNSSSATTMTTTLIE  
NTASASPGDKPKLILRINKRKTETSTKITCLEQPPVNEAPLRLKIARNLSGGGYIIGAKAEKKEDPPDP  
PPDPNQPNVSPANELPLMAPLGETSPOGLLLNSFTPHSQNANAS PALLGKDSGTPSPCLVIDSSKSADV  
HDSTSLPESGVAAMGVPASLVGATTPLCVNVGNYSNNSLPSASGTGSASSNSCNSNSNNNNNGSGGG  
AASGGGSLPLKKDCEVR

Canonical Epc-N  
PHD 1.5e-17  
AT hooks

>DmelanogasterAAS64921 (rhinoceros)  
MSQRGKRGNOQHSHHPPQHQHQRKDVEPQPPPTKRKGRPPNGATTAAVAEVTGSGPATGSERVVLP  
LCKSKHEEPGAEGGGGQGRAAGATSTSKSKSTKLAKSASKCKSQGASSSSSWQARSVADIKMSSIYNR  
SSTEAPAELYRKDLISAMKLPDSEPLANYEYLIVTDPWKQEWKGVQVPVNPDSLPEPCVYVLPVPEVSP  
AHDFKLPKNRYLRITKDEHYSPDLHYLTNVVALAENTCAYDIDPIDEAWLRLYNSDRAQCGAFPINATQF  
ERVIEELEVRCEQIQVILKLEEGLGIEFDENVIDVCRSPDSEANEMVFCDNCNICVHQACYGITAI  
SGQLCRCTSMGIKPCVLCPNKGGAMKSNKSGKHWAHVSCALWIPEVSI GCVDRMEPI TKISSIPQSRW  
SLICVLCRKRVGSCIQCSVKPCKTAYHVTCAFQHGLEMRIIEEGNAEDGVKLRSYCQKHSMSKGGKENA  
GSHGGGSASVASAMQKANRYGSGAGGGADDGNACGTTGEDPRRRKNHRKTEL TSEERNQARAQRLQEV  
AEFDKHVNFNDISCHLFDVDDDAIVAIYNYWKLKRKSRHNRELIPPKSEDEVMIARKQEQQDMENHKL  
HLRQDLERVRNLCYMVSRREKLSRSLFKLREQVFKQLGVLD EMRLEKQOTKQEQQPVMDLNAVYIYAND  
GPTLYDRFYSSVGGQTVPAQYQDLKYILEQLMGKLOSGKQGRGRASQSPNKRKQPAKASPNKLNNGILS  
SRTSSPEKTAVAGSKVGTSTTSKVRSPPGKNPTGRRASKSSAAAATSTHNKSQFHSNIRSSTTSHSSSGTIS  
SGNSSSANGTSSSDSSSGSDSGSESGSSSAGSGVSKRKS SSGSPLKKQSYARSVEQRQQRORRQNEAVA  
GASATYPDSRSASSSSDGEDERCNRQEPERGARRGPIQSKSVPNRSQASRSKPTTEADVGE GTGASARR  
KLSTTTTRGLAQMDKDADESVSSESEELLPLRGERQRESTTTSGLATTGSAIGRNLGQHIYSDSESSSE  
QEKDQEEQATVESNVSDSQNOQTIRTKAAMKEFVPGTAATTSSTSQASSTSKAKNTREGKEGAASIGNS  
TKTKPNPNAKLYPADLLVVPQRQAACKASENMRSTNLATTLQPDVSDRVREPDINSISGTAKSKVKDSS  
RVSNEADKSSLEKVRPKEHLQKTVGKTS ESAPAE RKGKGRPPKVPK DARPPTSITENDKPALPHTQSKPP  
SVVATPVSAKSNFAVSLVPQRQAACKAAEQLKSSKPVLESFSTGNDISDKETVTSATISGSGSSVPAAST

PVKPTRRSSIKEAPITPKEPLSGRRKSKEDLLATPIKTTPLVKRRVVVPNLSSSSSSGDSSESSSSSSSSSSG  
SSSSGGSDSDSESQASNSENPSSREPPVAPAKVPSDSSLVPKRSPRKSMDKPSALTIAPASVNLNIPST  
RSRQNSTTKSTKVALQKAVQSVEDDVKCTPKTNRLQSGMDECGKQVQLEQATKRATRGSKRPPSPTAKS  
SPEKTVSRCKSRAEESPKKVANLEQEISQRKVASGKGTSSLDKLLNKKQQQMNHSAQATPPPISPTPPAS  
ETRIVKDQCDLKPDEVSIQQINLGADAQPEPDLDPESAAEAGELPMDIDEELTTAPTRTQLSASASKLAD  
IIDDERPPAAPLPASPTPTPTSNDEMS DAGSDLERRRRMRWRSRRRRRRRSHEPDEEHTHTQHLLNEME  
MARELEEEERKNELLANASKYSASTSSPAVTVIPDPPEIIELDSNSAEQQOHLHDQPLPPPLVVQSPAA  
DVVPTVMQQQLLPSQRPLIEQLPVEHLPVETILEMEDSKFANNFASNLASVLNPPNQMSLIGSSIDRSK  
QISEEDSIQATRNLLEKLRKTKRKAQDDCSSKEAVDLLPPTPAIPSVFPFHNAADPEDIHAQKEQQHQ  
QQQLQSSQTCIYGNSGPNVASLTIKDSPMTANS GSYANSLTNTPNATPTNATMNNLGYQVNFNSQPP  
PTLGLFLEKSPHQKACPLSSNGGANVGPAPTDFVDLAAA AVKNTLGSFRGAATVPTQSGTGVNAKIN  
DYDESTRMQSPFGMPWNE SDLIAERRSSSPSSVSESNPPQPPPVVTTATATTARSLAQLESCKNFFNSY  
PSGNAGPGTAANATAPFNHPPMVNGIDSIPMFNNTNTTQHQPPTPAHQOQQOQRTPNNOYNGTIYPQLAGI  
MHPQTTTPEPPSSLYGNNGVGGAVQSTTLPPPAQVNOYPGTPYSATTLGMI SVQOPALSTVPVQTATT  
PNFTLTSPIDGKMPTYPAQLLSSCAEAVVASMMPPTPPVTATAKDSKRTSVSGSNLSKKQTHKSPQLP  
QGKSPGKSPRQPLQPPTPPAPVPVVALPPTKYDPQHTLQGKPRQAPRSGSGGAPGRGRGRGRGRGRG  
GGVTSGMAMVLPMPMSDYGSNTHIVNNLVGTPFEFNNEFDDMAGPGVENLQSLRDRRRSFELRAPRVQNK  
PTTTPTTATTNPLHPVLPGPVDMRTYNLGF EAPHSTASQEAYQNNLLGAFDSGTADQTLSEFNEDER  
QFQSALRATGTGTSPSKQHS GPTALVAPPTGPNPTPAPNLLLHCTEANQMAPNVAATGAATHLVEGSLVE  
ASLEATSEEVSDSDSTIPHSKTSTSDARSQIKLKI KSPMAYPEHYNAMTNSSSLTTLSTLVQSSNVVQT  
TVTSTVSVASSAVSGNSRRMRKKE LLSLYVVQKDNHNDSSCGLPAASDTLPLENLRKSEEEDELSSGN  
GTRKRFKKNSSSREL RALDANLALVEEQLLSSGAGACGGGSSGDGRRRSACSSGNSNNDNNGKTGAASSAGK  
RRGRSKTLESSEDDHQAPKLIKIRGLTANETPSGVSSVDEGQNYSEMTRRACPPKRLTSNFSTLTLE  
EIKRDSMNYRKKVMQDFVKGEDSNKRGVVVKDGESLIMPQPTKRPKSSKPKKEKKEKROKQOQLILSS  
STTTMTTTLIENTASASPGDKPKLILRFGRKAETTTRTASLEQPPTLEAPAPLRFKIARNSSGGYIIG  
TKAEKDESTADNTSPITELPLISPLREASPOGRLLNSFTPHSONANTSPALLGKDTGTPSPCLVIDSS  
KSADVHDSTSLPESGEAAMGVQSSLVNATTPLCVNVGNYENSNNLSLPSASGTGSASSNSCNSNSINNGS  
GGGRASGEGGLLPLKKDCEVR

Canonical Epc-N  
PHD 1.5e-17  
AT hooks

>CfamiliarisXP\_538629

MSVGGGLRRPVPEEASLRICVYKII FVMAITVPGKALKLMRDRKEWGS DPRLKRFKSVQQLLFSECLAFPT  
QGGSEDRGNLALGEIEGIGGKRKPEVKTQLSVPTNPTWISALVKESSPSSMEEKRRKYSISSDNDSTT  
DSHATSASRCSKLPSSSTKSGWPRQNEKKPSEVSGDKCLGKAEAVVGKPEWSPVETKGVFRDITAMKI  
PDSCQLSPDDYYILADPWRQEWKGVQVPAGAEAIPEPVVRI LPPLEGPTQVSPSSSELGEGSQPDWPG  
GSRDYLDDEIDAYWLEL INSELKEMERPELDELTLERVLEELET LCHQNMVRAIETQEGLGIEYDEDVVC  
VCRSPEGEDGNEMVFCDKCNVCVHQVWGI PGYLOKTCLEPSGPTLALTLSTYNNSLASAAGIALGEP  
ASPPVSQACYGILKVPTG SWLCRTCALGVQPKCLLCPKRGALKPTRSGTKWVHVSALWIPEVSI GCP  
KMEPITKISHIPASRWALSCNLCKECTGTCTIQCSMPSCVTA FHVTCAFHDGLEMRTILADNDEVKFKSFC  
QEHSDGGPRGEPTSDPVEPSPASEDLEKVTVRKORLQOLEEDFYELVEPAEVAERLELAEALVDFIYQYW  
KLKRKANANQPLLT PKTDEV DNLAQQEQDVL YRRLKLFTHLRQDLEREEEAGPTFOGVGGPCQHAAPAA  
PELDWQAPAESKARERAALAGGGEETT VLA VGAAQGLVPKALGLVTRSLLSGSM TWLERVGI ALRNTALS  
KIDLWISPRPCVAANPLGPPPPLKPGPTSPAASSVTCNLKCPSSPTASRLPPRSSRRLPAHVAVLVP  
IPQPRFLFLGPDPSNFWAVKPKVVEHLYQFALSPPAPRTHCAHGNIKRSVRNL CYMVT RRERTKHAICKLQ  
EQIFHLQMKLIEQDLCREGSGRRAKGKSDSKRKGREGPKGSPEKKEKMKAGPDSVLGQLGLSTSFPI  
DGTFFNSWLAQSVQITAENMAMSEWLNNGHREDPAPGLLSEELLQDEETLLSFM RDP SLRPGDPARKARG  
SRLPAKKKPPQDGPGRSTTPDKSPKKPWGQ EAGKAGQGPVARKPTRRTPSHLPSSPAAGDCVPVAPESP  
PPLAPETPDETAPVAADSNVQVPGPTVSPKPLGRLRLPRDKGTQ RSPGARPDVGTGPPSTVAERP KVS  
LHFDTETDGYFSDGEMSDSDVEAEDSGVQRAPREAGAEVVRMGVLAS

Canonical Epc-N  
PHD 1.3e-06

>MmusculusCAE30498

MEEKRRKYSISSDNDSTTDGHVTSTASRCSKLPSSSTKSGWPRQNEKKPSEVFRDITAMKIPDSYQLS

PDDYYILADPWRQEWKGVQVPAGAEAIPEPVVSWAARGQAKASLFITITILFPRLLPPLKGPPTQMSPD  
SPTLGGGAHPDWPGGSRYDLDEIDAYWLELLNSELKEMEKPELDELTLERVLEEELETLCHQNMAQAIETQ  
EGLGIEYDEDVVCDCVRSPEGEDGNEMVFCDKCNVCVHQACYGILKVPTGSWLCRTCALGVQPKLLCPK  
RGGALKPTRSGTKWVHVSALWIPEVSIKCEPEKMEPITKISHIPASRWALSCSLCKECTGTCTIQCSMPSC  
ITAFHVTCADFDRGLEMRITILADNDEVKFKSLCQEHSDGGPRSEPTSEPVPEPSQAVEDLEKVTLRKQRLQ  
LEENFYELVEPAEVAERLDLAEALVDFIYQYWKLKRRANANQPLLTPKTDEVNDLAQQEQDVLVYRRLKLF  
THLRQDLERVRNLCYMVTRRERTKHTICKLQEQIFHLQMKLIEQDLRCGLSTSFPIDGTFFNSWLAQSVQ  
ITAEDMAMSEWSLNSGHREDPAPGLLSEELLQDEETLLSFMRDPSLRPGDPARKARGRTRLPKAKKPSPL  
QDGPARTTPDKQPKKAWAQDGKGTQGPMPKPPRRTSSHLPSSPAAGDCPVPATLESPPPLASEILDKT  
APMASDLNVQVPGPTVSPKPLGRLRPPREMKVSRKSPGARS DAGTGLPSAVAERP KVSLHFDTEADGYFS  
DEEMSDSEVEAEDSGVQRASREAGAEVVRMGV LAS

Canonical Epc-N  
PHD 1.3e-15

>RnorvegicusXP\_220398

MEEKRRKYSISSDNDSTTDGHVTSTASRCSKLPSSSTKSGWPRQNEKKPSEVFRTDLITAMKIPDSYQLS  
PDDYYILADPWRQEWKGVQVPAGAEAIPEPVVRIPLPPLKGPPTLMSPESTLGGGAHPDWPGGSRYDL  
EIDAYWLELLNSELKEMEKPELDELTLERVLEEELETLCHQNMAQAIETQEGLGIEYDEDVVCDCVRSPEG  
EDGNEMVFCDKCNVCVHQACYGILKVPTGSWLCRTCALGVQPKLLCPKRGALKPTRSGTKWVHVSAL  
WIPEVSIKCEPEKMEPITKISHIPASRWALSCSLCKECTGTCTIQCSPTSCLTAFHVTCADFDRGLEMRITIL  
DNDEVKFKSLCQEHSDGGPRSEPSSEPVPEPSQAVEDLEKVTLRKQRLQOLEENFYELVEPAEVAERLDLA  
EALVDFIYQYWKLKRRANANQPLLTPKTDEVNDLAQQEQDVLVYRRLKLFTHLRQDLERVRNLCYMVTRRE  
RTKHTICKLQEQIFHLQMKLIEQDLCREPSGRRSKGKKNDSKRKGREGPKGSSPEKKEKMKAGPESV LGQ  
LAGLSTSFPIDGTFFNSWLAQSVQITAEDMAMSEWSLNSGHREDPAPGLLSEELLQDEETLLSFMRDPSL  
RPGDPARKARGRTRLPKAKKPPPLQDGPARTTPEKPAKKAWAQDGKGTQGPARKPPRRTSSHLPSSPA  
AGDCPVPATLESPPPLASEILDVPAASDLNVQVPGPTVSPKPLGRLRPPREMKVSRKSPGARS DAGTG  
LPSTVAERP KVSLHFDTEADGYFSDEEMSDSDVEAENRGVQRASREAGAEVVRMGV LAS

Canonical Epc-N  
PHD 1.3e-15

>HsapiensCAE30501

MEEKRRKYSISSDNDSTTDSHATSTASRCSKLPSSSTKSGWPRQNEKKPSEVFRTDLITAMKIPDSYQLS  
PDDYYILADPWRQEWKGVQVPAGAEAIPEPVVRIPLPLEGPPAQASPSSTMLGEGSQPDWPGGSRYDL  
EIDAYWLELINSELKEMERPELDELTLERVLEEELETLCHQNMAQAIETQEGLGIEYDEDVVCDCVRSPEG  
EDGNEMVFCDKCNVCVHQACYGILKVPTGSWLCRTCALGVQPKLLCPKRGALKPTRSGTKWVHVSAL  
WIPEVSIKCEPEKMEPITKISHIPASRWALSCSLCKECTGTCTIQCSMPSCVTAHVTCADFDRGLEMRITIL  
DNDEVKFKSFCQEHSDGGPRNEPTSEPTSEPSQAGEDLEKVTLRKQRLQOLEEDFYELVEPAEVAERLDLA  
EALVDFIYQYWKLKRRANANQPLLTPKTDEVNDLAQQEQDVLVYRRLKLFTHLRQDLERVRNLCYMVTRRE  
RTKHAICKLQEQIFHLQMKLIEQDLRCGLSTSFPIDGTFFNSWLAQSVQITAENMAMSEWPLNNGHREDP  
APGLLSEELLQDEETLLSFMRDPSLRPGDPARKARGRTRLPKAKKPPPPPPQDGPGRSTTPDKAPKKTWG  
QDAGSGKGGQGPTRKPPRRTSSHLPSSPAAGDCPILATPESPPPLAPETPDEAASVAADSDVQVPGPAA  
SPKPLGRLRPPRESKVTRRLPGARPDAGMGPPSAVAERP KVSLHFDTEADGYFSDGEMSDSDVEAEDGGV  
QRGPREAGAEVVRMGV LAS

Canonical Epc-N  
PHD 1.3e-15

>ScerevisiaeCAA95027

MNRGLDDGPKLREEKHFDYFYPDLNADTLLPFIVPLVETKDNSTDTSDDDISNRNNREIGSVKSVQTK  
LIFKGRVTTTEPLVLKKNVEVFQKCKITTNELKGGKNPYCVRFNESHFISRYHINKVNRNRSYKQQQKEFD  
GVEAPYFTKFSKEAPNITISTSTKSAIQKFASISP NLVNFKPYDMDEQDELYLHYLNKRYFKDQMSHE  
IFEILMTTLETEWFHIEKHIPSTNSLIARHNILRDCKNYELYGSDGTGLSMDQACAVCLGTSDNLNTI  
VFCDGCDIAVHQECYGIIFPEGKWLCRRCMISKNNFATCLMCPSHTGAFKQTDGTGSWVHNICALWLP  
YFSNLHYMEPIEGVQNVSVSRWKLNCYICKKKMGACIQCFQRNCFTAYHVTCARRAGLYMSKGGKCTIQEL  
ASNQFSQKYSVESFCHKHAPRGWQTSIEGINKARKYFSLSTLQETETPQHNEANDRTNSKFNKTIWKT  
PNQTPVAPHVFAEILQKVVDFFGLANPPAGAFDICKYWSMKRELTTGGTPLTACFENNSLGSLEEQVQTRID



FANDQLEDLYRLKELTTLVKKRTOASNSLSRSRKKVFDIVKSPQKYLKINVLDFIKSEQFKALERLVT  
EPKLLVILEKCKHCFDFTVQIFKKEEIMHFFEVLETLPGASRILQTVSSKAKEQVTNLIGLIEHVDIKLL  
SRDFIINDDKIEERPWSGPVIMEEEGLSDAEELSAGEHRMLKLILNSG

Canonical Epc-N  
PHD 1.9e-17

>TnigroviridisCAG08803

MAHILARPQHRALSLLLSTCESTGSPVGDQSALIPTSGTSTFYFAGTSFQLLCERGEFSPFFPPLLGP  
LTQSRYWQRNHPSVYRCVFLNRINGGTNISENFSKFSKTDSDNRADVGRERRRAEAWSORQPVSGAKASAN  
ANCSGAEELLPALASEAAGRPERSSGRPAFFCCYDLDDLDVAWLELVNHEFRQMALPELDELTMCEVLV  
ELESACEEKMRQAIETEEGLGIEYDEDVVCDVCRSPGEDGNEMVFCDKCNVCVHQACYGILKVPRGNWL  
CRTCALGVQPKCLLCPKRGALKPTRSGTKWVHVSCALWIPEVSIKMDSCHISEDHDRWESVHSGGGVAAGTRSG  
LCREHTGTICQCSMPSCIVAFHVTCFAFHSLEMRTILAENDEVRFKSFCLHSTASNSAPGLAGVSNNGN  
HGLPVTKGAQASAHQDQASAAGCMALRPDGEQRSLSAEERDQLEREKVSRLRKQKLOELEDYFRLVDPREV  
ADNLELVPVQVDFLYQFWKLRKSNFNRLVTLKRDEVDNLAQQEQDVLRYRRLKLFTHLRQDLERMKLRH  
EVIICPPGESPPVTIAPTRAAGFCLGPVEVRNLCYMVTRREKMKHTLCDLQEKIFHLQIQLLLEEDIAGG  
ETETNETPQLWLHGSSDGLRVLCERKEEKVVRVDEKQKEKSORGKRKQNGVKERKERRKSSPOKKEKEL  
SENGSLLKELGLSKSFLDKSLFDSWLAQSVQITADDMLSQWTLGAQHRDKSGSLLSDQLLOGEESLLNL  
MMENSMQSRWKTPLHGRKQRGSSKSRPRGSPQSPSPGLPPLLSAAATSAASRPSSTKNLWVNVQEKFSH  
LGQRMGSTRSSLLKALHHHFHQHQRNSDLRRDPPPQPPISKMDSCHISEDHDRWESVHSGGGVAAGTRSG  
FSTSSSLAPASSPGLDTGTLQSSVPLRVRVSRQAKSRGRSFGVEDLEAVRLPLPEKDRLEAAETDGYFS  
DGEQSDVDTRSGKRKRLRPLHRSRERGSAAKERASVLKHRDSGHALKSPCGGSKHTPLWSRFIAHLLSSW  
DDYECSCPLPGVRLKPLSTGPESPLASHTRTSSALFALMRQIGSPPGIGRTRPWRYRPGSGDKHFWALLFL  
L

Canonical Epc-N  
PHD 8.7e-16

>AgossypiiAAS51419

MSSGQTPVRAQEEGPKLREEKHYRDFYPLDNHVSLLPVFTASGEETALQDIEYKARINALRQLSRASGL  
KQIIYKKNVTVLRLGPKKTKCFKPKVKVTVQLNGKYHVPVAFHRYGYRSNVQTLNVDLARRAYMKKTD  
LLRNEFFVQVDSRYLRDFKQYDMDEQDDLYLQYLNKSGKARGSANALSALFEILITALEIEWFYLERK  
IPQRHPTNQSSTHESEAAIAHYELYGSDDGSGSSADQSCAICNGTSDNSNAIVFCDCDVAHVQECY  
VVFIPQWLCRRCMISKNRKINCLFCPSNTGAFKQTDGTSWGHVICGIWIPELFFANQHYMEPIEGIDM  
VPRSRWKLNCYICKQKCGACIQCSNKNCFVAYHVTCAKRAGLFMTFGGCTVPEAASKNFRPGVKLESFCD  
KHSPSGWGDQVQVILKTRRYFENIKEMVMRGNQRATSSEAOQPPTNRNWKTNRGTPPIAPQLFATILKQLL  
DKFGIAEAEQTAIDICKYWSMKRELKRGAPLVRIFDPTSFNSMDSADILKRVAFADVLLNDLAKLDELST  
LLVRRQAAQARLDAVDIINDLGFHPVRHLVQKNVTTWSTKEFIALMNFEPAFAGVLAKVDSQYDSIA  
SFSREVRTLFDQIAKEKDIPVELVSTITVQCRQFSKQIAKIEGLDVHKLMSRDFIFEGKKIREVDWHGPI  
LMKEEELSEVEDELTPAQERILKSFLRY

Canonical Epc-N  
PHD 2.3e-17

>AmelliferaXP\_396822 (misannotation?)

MAQRGKRINRNDNDLASCPGAIRKRCRLGPATGSSSLAATMGPSEEEETMASSSQGGASWTPRPLCDIK  
ISSIYNRSSAEAPAELFRKDLISAMKLPDSEPLSPNEYWVITDQWKQEWERGVQVPVNPDSLPEPTVTIT  
QATPIKQHFELPKKFFVIRSRDDYFNPEDEHLLSTTPARAEEKACAYDLDDTDIAWLDVNLGERAQAGQLP  
ITESQLERVIELEVRWCWERIQITIVKNEEGLGIEYDENVICDVCRSPDSEEGNEMVFCDCCNICVHQACY  
GITSIPDEVSIKVERMEPIKISSIPQSRWALICVLCRERVGACIQCSIKTCKTAYHVTCFAFKYGLEMK  
AIIEDEMADDGVKLSYQKHSRTNTKDKVQGTGSSIGSGGDKAGSDSEDAESRRRKRKDMTSEEKNQAR  
AAKLQEIIEAEFDKHVSLKDIASQQLDVPDGIYIYNYWKLKRRAGHNKPLLPAPRCGELSGSGSRNQQA  
ADLEKMRFTVQLRQDLERVRNLCYMVGRREKLCRSFLRLREQTFHKQALVMSGPPLPAAAAAVMEANHG  
PSIYDRLYSHPDSEHDTDFDTIVARIDFNGASSKLYFNGSVRRKNLYGSDLSSVSSSETDATKAKTEK  
SKNLKLETESSTEEETNVSATKLSRRKAKKAVQSVKHLSTVRENSENEKLVNSRSHTLEHMEKELGSA  
SGSEDELTLTSGGATKHFVASAIYSDTSDSDEHASHSAVLITKAAVKEFSAANLSKNSQKNFNKDSRH  
VESTYHNTGSKNKENQNKTSVKKKEYIPALIVPQRQAACKASEIMQRTQOGKKNVSPETMSEI IKSPV

EEIPKSSSSKQSKDKSPNKKQRENKQSKKEIKNNVDVYDFDKFEFGDGTEILAYVPPQROAAKKA AEHIKSGMG  
NKTTQOIEQETFDGRSKKESPETGKRKEFRKDDSSRKEELSSRKEEISSSSSSSSSSSSSSSSSSSSSSSS  
SSSSSRKEDLSSRKEELVSKKEESSRKEEISKESRRRPRKSNELIDGSSATTSSSDSGNRTKSKAIPS  
SANRKQQPSKTSPPERQEAERKISGRKLKKLPEKCLKTSDGRRGPEFQPPTEREERP RACKEQQQQQHQT  
QQEASVKKQDQORDKKQSTTTAGTEVDEDLLIGSGDNDGKLHLGKKKTDRLNGKSGQENAIHQQSVELQNI  
ESQTI SLGENVQKESNEDDNGK SILERVENSEKEHQKRRKSANRSIFSPQH GKDASVSELFDFDQDMLTE  
EIVNEDGFGISRDAEERGVPLSFSFNELWFKEDSKEDSARETLHLVEKLRMELSKKSNSSQIELEAVPV  
DEPVLNVKNAIEISEEEI STNETRPSSCKSTIEEKRKSCYSGGNDRYAAAYEEDRET NKVSLVERSKLDRAE  
TDERWVPPSINSFQLSDVQHLNALMETQNRRYGNHQFPNESIPENESIARTHLNAPITAPPTESIERTQQ  
QLQTQVADSPSLPMNFLT VAPENHTNDTVVESLQEALADGKSQHSGKSPSKPRTSARVTSLQKSPG  
KSPRQDTQKTIPGARGRGRGTKN SAQHSGYRGRGRGRGRGRSGQNSGLSLVSGGGIGQHDDSIQNKLV  
GTVYDFDSDEDSTSEANIADLRTMRERKSTDAATAGVERRDSTVMASGESIQSRLSSPGGTRKYLED RR  
LSCSPNHDDSAVVENQSNAGQSFDTVLP LIPGPVDMRTYNSTLDASSSSTLHGQTYENHFLGTFTGVSTN  
DPALPDIEEDLEKELRSALIKQGQEDCSKPSFDASIDASSSGFVD TNKVS LTDSRNQLKVKIKGPF LDAN  
YVATSSVPPLAQQAPV IITPAATSASIASGTSNLRRMRKKE LICLI VT CNKMKPTLVADEMFPEGAGSYI  
ELEEVGGSRLLVDLTASEKAVHADFFNDFDDLDYDDDDLE

Canonical Epc-N  
PHD 1.8e-09

>KlactisCAG99327  
MQTQEDGVRLREEVSKHFY PDL DVNDLVLF GKNNHDELNDRHRHDEEEVYPDDNLREHLKSWKQLIVND  
SITIEMLG P QIKNAEFKRC KIRISQLNPHGKVNKQLVKYGYRSHADRTCGLDQKSYCKKTDLLMKHSNEF  
FADVSPYQVNFKVEYDMDEQDDLFLRHLNTALTNSKHKLSHEVFEIVITILENEAFHLEKKIPRVSPSA  
TNNTHESHA AWKHHELYGSDDGTGYPMDQPCAVCGGIECDNSNAIVFCDGCDIAVHQECYGVVFIPEGQW  
LCRRCMISKNRKLECLFCPSTTGAFKQTDNGSWGHWLVCGIWIPELYFGNLHYMEPIGGIENIPKSRWKL T  
CYICKQEVGACIQCSNKNCF AAAYHTTCAK RAGLYMNFNGCTVQEAASKNFSTGAFLESFCHKHS PNGWSS  
CEDGIRKTRDYFNHINHVKVLQDSAVEENKQS AKKTIKNKWKTSRGT LIAPQAFADITMRV LNRFHV P NS  
EQISLDICKYWTMKRELKRGAPLVRKFSPSSLNTLDTEELNDRIVFSEVLLRDLNSLEGLASSLVAKQEC  
NVERVRNQRINDIAFHPIRYILKD VVWNNLTKTL SFKSFADLESSNFKVIPYISSRLENDEYLSVQEF  
KDFVGNIVKITSNERSPSRLVIMGSKLINDLNKLLSKIDELDVHTLLHDDFDIDERTHQVEEVNWKGRK  
ILAREGLADVEDLSIKQERQLKGLLRD

Canonical Epc-N  
PHD 3.1e-14

>CalbicansEAL04413  
MNSVSANSYDFSLKPREETDFKEIY PDLDETCQLPVFVIDRNTNSEESSNLRHAVNLSSELKAPTYRRVPO  
LSLTPTNLRFSKQLSEYGFQNP SKLTKNPNPD TYIRPFQLNASLRETTASIEKFIEKKNLVEYDMDEQD  
YLFLODRNNQ PENVIKITPEVFEIMMTSLENQWCALELKMNSITTNVGSSTSDPGSNHKLTTIGHNNAKY  
GNDDGIVPGSIYDQKCAICNDSDCDNANAIVFCDGCDIAVHQECYGVAFIPEGQWL CRKCMINKNRTTEC  
VFCPSTTGAFKQLDNLWSHVICGLWINELYFANPIYMEPIEGMEGIPKSRWKLTCYICKQRVGACIQCC  
NRSCFQAYHVTC AKRAGLYMSMTQGIKGAISNKLTLKSYCERHSPAEFDETKVLDGIRRTRLYYRDTKLL  
NEENARLSKDRETANKLNIFKWNT EANTPIAPKLFSDVLVQILYQLKVENQISLPEESTNEVLHLKVLPN  
RTKMEILQDLRSIADEVCRYWCLKRKSKRGASLIRKNNNLIATSSILYDSNSLENNNACESTKKEIFAES  
LVSDIDRLISMGEMLTDEQEANHEINSV SFDVDSVYFPLKQLIELTIMRLNNKFDNFNETLRTYKPKSDA  
VISLNSISGKNSQYGYQSIDQLEQDVENLREYIFQENKPS SAVYKMKMNWIAGFRKELPSLQVFEKDVIN  
DGNQKSSLSFPNRSAGTNTDLKLV DYRTILEENDLSEIDDDEIESVQNQKELEKFLQD

Canonical Epc-N  
PHD 2.3e-14

>CbriggsaeCAE69485  
MTPGSSEGPSFSGPGI IRRPPSEKRPRRNGYETFP TVQKPIDRRKSDVKHKTSKRPA P P P P P S D N D D V P S T  
SSAPVKPKK KKEKQEP RYDTSTSTIPFTQMASRYDMDADSDTELADCLPFAYIGDKWRTEYSRGVPIPC E  
TTLPRAVVMDDGFVLKPKDDYRHPVKRIACSDRAEYFDEERFELLEGE EEEKVHYEVT AHDLKWLERLNK  
ARKQSNKTYLPTTVFSKIMEILETQTYTAIHKQLLSNLHVCVSSPRDDDECDVCRD VDTDGSEEMIYCD  
SCNICVHETCGGVKT VPTGGWKCLKCRFSRQGPAPKCIFCPALGGSMTHSADKKLWAHHSALFVVKQIEF

EDAEDRAP IKFVEKVEEHQYREKCCVCDTKQGVCKCSDEECEMTFHVCCALRAGCQVVVKEKLDHSGMD  
YIHKCHRHSEPENNRRLAIEDEWLEYRNPWLAKLESFFYG FVNYVDVSI STSLPEFLIADAFEYWKQKRL  
DAGGPLIRNLSDLIPVPTTIEDVARRAMETQONRASISIGTVGMALKPSTSSDPSGPSTSTATTSSGPET  
SGSGLRGAHQENHPFRPAVLMVNELRHIHLKRAANAMKRDIMLSKMVMRREGLNVKLAEASLETIRIA  
QMMFETGEESLEEIQKAFDFESMSKNQLKRAAEPERFKAFLEIRIGGVQRPQKAPRTSGDHQNAQKATOKT  
SGGFQKQQLPKTSPEKSPLRRQNHNSPSPKPRSSEAVRPGTSGTFFRPTSSASDAQNRPTSSGTSSIAAS  
PDHPHNTRHKHNRITTPWNYDQNHNNNNKSMTSSGSHHRRSTSSKNQDFLASPASGPSTSSRFH

Canonical Epc-N  
PHD 3.8e-09

>CglabrataCAG61415  
MSRASNDVGPGLREEKHFNDYFPDLANDLIPILVSOETDQSQSVDSQDEIIRKQHYKQLIFNGSITVEP  
ITITKQATDVQOIPYPVNDFATFIDAKRYSKKS SVGNTLISKFYSDHIQGKTKRRQORI INAHDSKIYK  
DKFMTHSNQIKRDKAIQSHFEALSPNLSGFIPOYDMDEQDALYLEFLNQSLGEKYITA EVFEI IITILEL  
EWYHLDKHI PPKITDTNDSQLNSIQHHANKVRYELYGSDDGTGLTSDQACAVCDGTVSTTTNMIVFCDCG  
DIAVHQECYGI VFIPEGQWLCRRCFISRNKQVNCVTC PSTTGAFKQTHTGSWAHVLCALWIPELVFANLH  
YMEPIEGVENINKSRWKLVCYICKLRV GACIQCSNKNCF AAHYVTCAKRAGLC LDTHDTSIAEMASKHYQ  
MHVHTSYCDKHSPPGWPSCAEGIMKTRRYFANRDAISEVSKEKQLITKGVNSEDKNSAHWKTNKGTPIA  
PMYFTHIIQKVLVMFDISNEIPLSILLCKYWAMKRELKRGAPLVRVHTNLSYNSQNESYLNDRIOFIDSL  
LGDQLSLGNISRLIKERVNATKSF RATNKKINEVFTSPKEYFFRRNVLSKFLHFNAFTSL LALLDKHTIV  
DHSVNALRNSTSATFIENVEAFVNFAS TKLDETRLTSDYIHRISNYAKELSAQFDKVDYEREINMDFEVN  
KEHDKLSV SERLWKGPILOQEEGLSDVEELTPSESRI VNNLPIEKEKPTKVKRRKKWKSY

Canonical Epc-N  
PHD 1.1e-12

>SpombeCAA21075  
MQTFRILTSTGRNILRPDELAFQPREEIPYKSFHPDLQIDEPLEILEGDHTQYAGLRDSLVTYKSENSYVL  
KALLNAKIENVKPVGVQ TENINPQEKKFGYKTAKQLDWSPEYFKFVAIHPYSKTSFPVSYDLDELDTMW  
LTYYNFQLSSNSEWENVSKEFLEIVLTI IEREWLYLEAWMPKIEPVRVEDEL DGRVCVICNEAECENSNA  
IVFCDCNNTSVHQNCYGIPFVPEGQWFCCKCLLAPHEVICCAFCDPRDGAFCCTLDGRWCHTICAIAIPE  
ISFHDTSRLDLVRNIASIPKSRWKLVC CICKLRWGTVCQSDKNKYAAYHITCARRAGFFYKHSYHSASY  
DSVDMETYSYCDKHTPPDYLNGLMKRFLPLAELYKRMATDVPLNFQATKAPDFVPEGPWKSHPLPAFIVDK  
VTKVLLSYNVKRQDLPSIVTDICKFYHMKRRSRKDAPLLKSQLLMDSLENLPVRASKDRVRSLEVAKALQ  
DQYQSLTLTVESTAKRQLLKCQLSNLRKKFLNLNYFPAQRLLQD TLVKIIDLDVDGLFNMPLDNGWIGWV  
ELKRQVFSYQIGSIS SLEKKLEPIWDVDGVIQCIDDMEQLTAMVQFAQKTEGEVKKLF IKAKIYFESLSL  
DERGNLKVPSLGLINGLEYDNWPGLNELEMSQLDIPSQGNLKS LHD FIEGLDLNEKIGKFPISMFNQVAQ  
FSTIEIPKMSGRANGMHNHFS EDVGTQSNHALPNSVTKKNGTKQPYTKNSLPFNERITRSKAKKNYS

Canonical Epc-N  
PHD 1.6e-15

>EcunuculiCAD27158  
MYRKKKFSIPCGESWNPKMSTSGWLGGIPREEHSYKAIYRNLELSRMHRVVS DHVPMSEEKHEGKKTIDE  
EQPRGLFESVIYRLDGYDQRYLRESAIDVSEDAFELIVDRLEKEWFFFVHGLVDRHVKPIEPSSFC DICT  
KHTSTHNEALVVCQGCEICVHESCYGIQDLSSFWL CRKCIYGEYQIRCSFCISSDGIFKQTS DNRWGHVL  
CAMFNRFSLFSGHLLSKDPIDVSSYLEESGCLFCNEFGGTAIHCSYFMCTRKYHVG CALDKCYFDLNNGIS  
YCIDHDPLKRNYPYELGYGRMGLR YFGYEKLRNPPAIRRKVRMARPRATLFMKLCKLQPVATPSVLSRVE  
ACDLKEKDSVNIKFVSRYWELKRKEIGGPLVILPDIVYGRKTR EDWMSKRRM

Canonical Epc-N  
PHD 8.1e-07
